# Supplementary material for: Species Discrimination of Three Odontomachus (Formicidae: Ponerinae) Species in Thailand Using Outline Morphometrics
Source: MDPI journal article supplement (doi:10.3390/insects13030287), 2022-03-14
Supplement: s1 [file s1]

**Table S1.** Specimens used in this study.

| Species                        | Localities                                             | Date           |
|--------------------------------|--------------------------------------------------------|----------------|
| <i>Odontomachus monticola</i>  | N Thailand, Chiang Mai Prov., Doi Chiang Dao W.S.      | 26 AUG 2014    |
|                                | N Thailand, Chiang Mai Prov., Doi Chiang Dao W.S.      | 29 NOV 2013    |
|                                | N Thailand, Chiang Mai Prov., Mae Sala Luang           | 8 MAR 2008     |
|                                | N Thailand, Chiang Mai Prov., Doi Suthep-Pui N.P.      | 20-24 DEC 2004 |
|                                | W Thailand, Tak Prov., Thung Yai Naresuan East W.S.    | 19 FEB 2015    |
|                                | NE Thailand, Loei Prov., Phu Luang W.S.                | 14 APR 2010    |
|                                | NE Thailand, Loei Prov., Phu Luang W.S.                | 11 APR 2008    |
|                                | NE Thailand, Loei Prov., Phu Luang W.S.                | 9 APR 2008     |
|                                | Central Thailand, Uthai Thani Prov., Ban Rai District  | 23 OCT 2013    |
| <i>Odontomachus rixosus</i>    | N Thailand, Prayao Prov., Nammin Forest Park           | 29 JUL 2017    |
|                                | W Thailand, Kanchanaburi Prov., Thong Phaphum Dist.    | 21 DEC 2003    |
|                                | E Thailand, Chachoengsao Prov., Khao Ang Reu Nai W.S.  | 27 FEB 2003    |
|                                | E Thailand, Chachoengsao Prov., Khao Ang Reu Nai W.S.  | 21 AUG 2003    |
|                                | E Thailand, Chachoengsao Prov., Khao Ang Reu Nai W.S.  | 24 APR 2003    |
|                                | E Thailand, Chachoengsao Prov., Khao Ang Reu Nai W.S.  | 26 OCT 2002    |
|                                | E Thailand, Trat Prov., Koh Kud                        | 23 OCT 2016    |
|                                | E Thailand, Trat Prov., Koh Kud                        | 18 APR 2009    |
|                                | S Thailand, Nakhon Si Thammarat Prov., Khao Nan N.P.   | 16 APR 2007    |
|                                | S Thailand, Nakhon Si Thammarat Prov., Khao Nan N.P.   | 26 NOV 2006    |
|                                | S Thailand, Nakhon Si Thammarat Prov., Khao Luang N.P. | 20 MAY 2003    |
|                                | S Thailand, Trang Prov., Khao Chong B.G.               | 10 MAR 2007    |
|                                | S Thailand, Phuket Prov., Tha Lang Dist.               | 7 APR 2012     |
|                                | S Thailand, Songkhla Prov., Had Yai Dist.              | 19 OCT 2011    |
|                                | NE Thailand, Srisaket Prov., Phanom Dongrak            | 13 SEP 2018    |
| <i>Odontomachus simillimus</i> | Central Thailand, Uthai Thani Prov., Ban Rai           | 6 FEB 2014     |
|                                | Central Thailand, Bangkok, Bang Kean                   | 25 JUL 2003    |
|                                | S Thailand, Narathiwat Prov., Hala-Bala W.S.           | 6 NOV 2002     |

Remark: All colonies were collected from rotting logs in primary forest.

**Table S2.** Coordinates of head and pronotum of three *Odontomachus* species.

| HEAD <i>Monticola Rixosus Simillimus</i> 25 33 22 (80) |                     |                     |                     |                     |                    |
|--------------------------------------------------------|---------------------|---------------------|---------------------|---------------------|--------------------|
| 41                                                     | 2.2069087313708557  | 1.6041088987910737  | 1.3774656072195253  | 3.120381273497292   | 1.293130978206085  |
| 2.955727950185337                                      | 1.1766688714732387  | 2.819186169877862   | 1.0762705036000955  | 2.6665806507106846  |                    |
| 0.9758721357269523                                     | 2.505943262113655   | 0.935712788577695   | 2.31317839579722    | 1.0039836787314325  | 2.096317921191231  |
| 1.0762705036000955                                     | 1.87142557715539    | 1.1485573284687587  | 1.6385013636896977  | 1.1365095243239816  |                    |
| 1.4216408890837082                                     | 1.1204457854642786  | 1.2369078921971246  | 1.144541393753833   | 1.0762705036000955  |                    |
| 1.1887166756180159                                     | 0.8714578331388833  | 1.2409238269120504  | 0.6867248362522997  | 1.321242521210565   |                    |
| 0.5100237087955677                                     | 1.481879909807594   | 0.32529071190898406 | 1.6987403844135835  | 0.25300388704032095 |                    |
| 1.9196167937344988                                     | 0.26906762590002387 | 2.1003338559061566  | 0.29717916890450397 | 2.301130591652443   |                    |
| 0.3774978632030186                                     | 2.5742141522673925  | 0.32529071190898406 | 2.8392658434524907  | 0.32930664662390985 |                    |
| 2.995887297334594                                      | 0.39757753677764723 | 3.1123494040674404  | 0.5260874476552706  | 3.2127477719405837  |                    |
| 0.7549957264060372                                     | 3.236843380230138   | 0.9919358745866552  | 3.285034596809247   | 1.1847007409030903  | 3.285034596809247  |
| 1.4176249543687824                                     | 3.232827445515212   | 1.634485428974772   | 3.208731837225658   | 1.8232343605762813  | 3.2488911843749153 |
| 2.020015161607642                                      | 3.297082400954024   | 2.22884376678378    | 3.3372417481032812  | 2.393497090095735   | 3.3171620745286527 |
| 2.550118543977838                                      | 3.252907119089841   | 2.6505169118509815  | 3.148492816501772   | 2.819186169877862   | 3.028014775054     |
| 2.963759819615188                                      | 2.927616407180857   | 3.0561263180584803  | 2.8111543004480106  | 3.180620294221178   | 1.3774656072195253 |
| 3.120381273497292                                      |                     |                     |                     |                     |                    |
| 40                                                     | 1.9380242013482063  | 1.2176438611363627  | 1.4018270454223898  | 2.3071033060807045  | 1.3444028050074968 |
| 2.1753653427759496                                     | 1.293734357582591   | 2.1044295163810816  | 1.216042738197736   | 1.9862031390563017  |                    |
| 1.1653742907728302                                     | 1.878110451216503   | 1.0876826713879748  | 1.7463724879117484  | 1.1011942573679496  |                    |
| 1.621390317596981                                      | 1.1383511188128805  | 1.4727628718172578  | 1.1856416697427925  | 1.3444028050074968  |                    |
| 1.236310117167698                                      | 1.2565774961376603  | 1.2565774961376603  | 1.1923974627327798  | 1.2430659101576855  |                    |
| 1.0809268783979873                                     | 1.2430659101576855  | 0.9255436396282767  | 1.259955392632654   | 0.7431372288986163  |                    |
| 1.3038680470675723                                     | 0.5303297497140126  | 1.3376470120175095  | 0.3411675459943648  | 1.4491175963523018  |                    |
| 0.21956327217459118                                    | 1.6653029720318993  | 0.1317379633047547  | 1.8578430722465409  | 0.11822637732477986 |                    |
| 2.0267378969962264                                     | 0.1587611352647044  | 2.182121135765937   | 0.14862744577972326 | 2.3611496500006037  |                    |
| 0.17565061773967294                                    | 2.5131549922753207  | 0.24658644413454087 | 2.600980301145157   | 0.3546791319743396  |                    |
| 2.6516487485700626                                     | 0.513440267239044   | 2.675294024035019   | 0.7296256429186415  | 2.695561403004981   | 0.9356773291132578 |
| 2.682049817025006                                      | 1.1248395328329055  | 2.661782438055044   | 1.2498217031476728  | 2.719206678469937   | 1.4018270454223898 |
| 2.773253022389836                                      | 1.5808555596570566  | 2.800276194349786   | 1.7767735563666918  | 2.7800088153798237  |                    |
| 1.8612209687415344                                     | 2.7023171959949686  | 1.9625578635913459  | 2.6178697836201255  | 2.074028447926138   |                    |
| 2.546933957225258                                      | 2.1787432392709434  | 2.4591086483554214  | 2.263190651645786   | 2.4084402009305155  | 2.35777175350561   |
| 1.4018270454223898                                     | 2.3071033060807045  | NA                  | NA                  | NA                  | NA                 |
| 33                                                     | 1.9937354143352695  | 1.4092696240831764  | 1.3043376374217446  | 2.8932580320991423  | 1.1818089502700049 |
| 2.7667768066521856                                     | 1.0434701099373958  | 2.608675274843489   | 0.9486091908521779  | 2.375475515425662   |                    |
| 0.8616533483573949                                     | 2.197611292140879   | 0.8735109632430471  | 2.0316046837417474  | 0.940704114261743   |                    |
| 1.8063100009143553                                     | 1.0395175716421783  | 1.5612526266108762  | 1.0869480311847872  | 1.395246018211745   |                    |
| 1.0632328014134826                                     | 1.154141182203483   | 1.0711378780039176  | 0.8458431951765253  | 1.114615799251309   |                    |
| 0.6047383591682634                                     | 1.2094767183365267  | 0.32015560191261005 | 1.38734094162131    | 0.12648122544695706 |                    |
| 1.5968254712678327                                     | 0.06719315101869593 | 1.7509744647813117  | 0.08300330419956556 | 2.0474148369226173  |                    |
| 0.16600660839913112                                    | 2.335950132473488   | 0.11462361056130482 | 2.6719158875669677  | 0.14229137862782668 |                    |
| 2.877447878918273                                      | 0.2687726040747837  | 2.98811895118436    | 0.47825713372130635 | 3.0474070256126216  |                    |
| 0.8181754271100034                                     | 3.063217178793491   | 1.1027581843656569  | 3.043454487317404   | 1.3715307884404404  | 3.082979870269578  |
| 1.6719236988769635                                     | 3.1738882510595783  | 1.9604589944278343  | 3.2213187106021874  | 2.1501808325982696  |                    |
| 3.169935712764361                                      | 2.3201399792926183  | 3.051359563907839   | 2.5612448153008804  | 2.8458275725565336  |                    |
| 2.7667768066521856                                     | 2.7114412705191415  | 2.956498644822621   | 1.3043376374217446  | 2.8932580320991423  | NA NA NA NA        |
| NA                                                     | NA                  | NA                  | NA                  | NA                  | NA                 |
| 39                                                     | 2.06986980973503    | 1.5564828335892087  | 1.3550568918178194  | 3.1794858997773536  | 1.2611824685894766 |
| 3.016226033293279                                      | 1.0734336221327907  | 2.8366401801607966  | 0.9999666822149571  | 2.677461810338824   | 0.914255252310818  |

|                     |                     |                     |                     |                     |
|---------------------|---------------------|---------------------|---------------------|---------------------|
| 2.5590984071378697  | 0.8367068157308825  | 2.3999200373158973  | 0.8489513057171881  | 2.2652306474665354  |
| 0.9305812389592254  | 2.0489113243751365  | 0.9877221922286515  | 1.8611624779184508  | 1.0162926688633647  |
| 1.6244356715165427  | 0.9713962055802441  | 1.3917903617767362  | 0.9632332122560403  | 1.212204508644254   |
| 1.0244556621875682  | 0.8897662723382067  | 1.1305745754022167  | 0.5754910293563631  | 1.248937978603171   |
| 0.34284571961655674 | 1.4162793417493476  | 0.19999333644299142 | 1.64076165816495    | 0.1550968731598709  |
| 1.8325920012837378  | 0.15917836982197275 | 2.0203408477404237  | 0.18774884645668583 | 2.106052277644563   |
| 0.20815632976719517 | 2.3509420773706746  | 0.1673413631461765  | 2.5999133737588886  | 0.1550968731598709  |
| 2.8407216768228984  | 0.22448231641560262 | 2.9754110666722604  | 0.33876422295445485 | 3.1182634498458257  |
| 0.5550835460458537  | 3.2121378730741683  | 0.881603279014003   | 3.2733603230056962  | 1.1999600186579487  |
| 3.2366268530467797  | 1.4489313150461625  | 3.2039748797499645  | 1.6774951281238668  | 3.2529528396951872  |
| 1.975444384457303   | 3.342745766261428   | 2.2407416674939244  | 3.3509087595856317  | 2.42849051395061    |
| 2.6325653470557033  | 3.163159913128946   | 2.7713362335671667  | 3.04071501326589    | 2.918270113402834   |
| 2.950922086699649   | 3.0203075299553808  | 2.8407216768228984  | 3.163159913128946   | 1.3550568918178194  |
| 3.1794858997773536  | NA                  | NA                  | NA                  | NA                  |
| 40                  | 2.333254306938495   | 1.6647707753701744  | 1.6707253062028729  | 3.172732047001022   |
| 1.5719632191366932  | 3.016358742479571   | 1.4114748276541513  | 2.9381720902188455  | 1.3127127405879715  |
| 2.806489307463939   | 1.259216610093791   | 2.654231089903579   | 1.1604545230276113  | 2.514318133226491   |
| 1.1481092621443387  | 2.3867504374326756  | 1.2221808274439736  | 2.1892262633003163  | 1.2880222188214268  |
| 1.8888249151406864  | 1.3209429145101532  | 1.711876175813781   | 1.3456334362766982  | 1.5472726973701483  |
| 1.3003674797046991  | 1.349748523237789   | 1.2756769579381542  | 1.1275338273388846  | 1.3127127405879715  |
| 0.9217794792843437  | 1.3744390450043338  | 0.6707591746578037  | 1.4526256972650595  | 0.46088973964217184 |
| 1.6048839148254197  | 0.2715957394319941  | 1.8682494803352323  | 0.22221469589890427 | 2.102809437117409   |
| 0.2551353915876308  | 2.25918274163886    | 0.3086315220818115  | 2.5102030462654     | 0.23867504374326756 |
| 2.8517552640359383  | 0.20986943501563182 | 3.123351003467932   | 0.2757108263930849  | 3.3085299167170192  |
| 0.43208413091453607 | 3.3908316559388356  | 0.6542988268134404  | 3.3867165689777448  | 0.8806286096734355  |
| 3.419637264666471   | 1.209835566560701   | 3.374371308094472   | 1.4937765668759677  | 3.41140709074429    |
| 1.7036460018915995  | 3.477248482121743   | 1.9711266543625028  | 3.571895482226832   | 2.2427223937944967  |
| 3.571895482226832   | 2.3455995678217674  | 3.543089873499196   | 2.4937426984210367  | 3.477248482121743   |
| 2.6624612638257603  | 3.407292003783199   | 2.8229496553083027  | 3.2797243079893836  | 2.9381720902188455  |
| 3.176847133962113   | 3.0945453947402966  | 3.1192359165068417  | 3.176847133962113   | 1.6707253062028729  |
| 3.172732047001022   | NA                  | NA                  | NA                  | NA                  |
| 35                  | 2.034124075462336   | 1.6819459438213666  | 1.3809805109543645  | 3.0871337584997276  |
| 1.2846330334459204  | 2.9546559769256167  | 1.15215525187181    | 2.7980913259743954  | 1.0357353832157734  |
| 2.6415266750231736  | 0.9233299927892553  | 2.4849620240719523  | 0.8751562540350333  | 2.3444552860388046  |
| 0.9032576016416628  | 2.1878906350875833  | 0.9755182097729957  | 1.9189205937098435  | 1.0156629920681808  |
| 1.6820663781682519  | 1.0357353832157734  | 1.505429336069438   | 0.9835471662320328  | 1.3127343810525498  |
| 0.9795326880025143  | 1.0357353832157734  | 1.0196774702976994  | 0.8069101241332187  | 1.0798946437404768  |
| 0.5379400827554791  | 1.3809805109543645  | 0.24488317200062856 | 1.6539650305616225  | 0.22481078085303607 |
| 2.0072391147592508  | 0.24488317200062856 | 2.320368416661694   | 0.20875286793496206 | 2.633497718564137   |
| 0.2569266066891841  | 2.8181637171219878  | 0.42553469232896113 | 2.9385980640075426  | 0.730635037723673   |
| 3.010858672138876   | 1.0758801655109582  | 3.0148731503683943  | 1.3287922939706238  | 3.0028297156798387  |
| 1.569660987741734   | 3.0710758455816536  | 1.722211160463437   | 3.1272785407949124  | 1.882790289644177   |
| 3.235669452991912   | 2.1437313745628797  | 3.2557418441395045  | 2.324382894891212   | 3.167423323090097   |
| 2.4889765023014707  | 3.091148236729246   | 2.633497718564137   | 3.042974497975024   | 2.7499175872201733  |
| 2.930569107548506   | 2.858308499417173   | 2.778018934826803   | 3.091148236729246   | 1.3809805109543645  |
| 3.0871337584997276  | NA                  | NA                  | NA                  | NA                  |
| 40                  | 2.2928594840370415  | 1.4710170475484776  | 1.6732536554309578  | 2.9560814579280255  |
| 1.5417837253613826  | 2.784772155110094   | 1.4142977325666428  | 2.633382538666341   | 1.258924178848054   |
| 2.4620732358484094  | 1.1672936215268348  | 2.314667556679492   | 1.1593257469771636  | 2.187181563884752   |
| 1.1832293706261774  | 1.9959525746926425  | 1.2509563042983827  | 1.75293240092767    | 1.2668920533977253  |
| 1.6174785335832593  | 1.246972367023547   | 1.207132994275191   | 1.1155024369539719  | 1.2230687433745335  |
| 0.9680967577850542  | 1.2111169315500265  | 0.7210926467452461  | 1.3186832379705882  | 0.525879720278301   |
| 1.466088917139506   | 0.36253829201004084 | 1.621462470858095   | 0.24700411103980807 | 1.7808199618515195  |
| 0.20716473829145193 | 1.9879847001429714  | 0.21114867556628752 | 2.2668603093814643  | 0.25098804831464366 |
| 2.493944734047094   | 0.1991968637417807  | 2.673221911414697   | 0.2031808010166163  | 2.8285954651332856  |
| 0.28285954651332856 | 2.856483026057135   | 0.3226989192616847  | 2.995920830676382   | 0.525879720278301   |
| 3.1552783216698064  | 0.8485786395399858  |                     |                     |                     |

|                     |                     |                         |                     |                         |
|---------------------|---------------------|-------------------------|---------------------|-------------------------|
| 3.1951176944181623  | 1.0915988133049581  | 3.2070695062426693      | 1.3585226107189443  | 3.2030855689678335      |
| 1.4302334816659854  | 3.2827643144645458  | 1.5856070353845744      | 3.370410934510929   | 1.8087075227753686      |
| 3.4301699936334638  | 1.9999365119674781  | 3.4739933036566555      | 2.1314064420370533  | 3.4421218054579703      |
| 2.2668603093814643  | 3.374394871785765   | 2.3903623649013683      | 3.3465073108619157  | 2.49792867132193        |
| 2.6254146641166693  | 3.187149819868491   | 2.7210291587127244      | 3.055679889798916   | 2.920226022454505       |
| 2.9560814579280255  | NA NA               |                         |                     |                         |
| 38                  | 2.4958513585160333  | 1.4385185197600086      | 1.6947654492781108  | 3.020055966486112       |
| 1.5863325887792743  |                     |                         |                     |                         |
| 2.8393345323213848  | 1.493963855761747   | 2.74294976743353        | 1.393563059003565   | 2.5903405563610935      |
| 1.293162262245383   |                     |                         |                     |                         |
| 2.4136351540666934  | 1.2289057523201468  | 2.2690580067349115      | 1.2690660710234194  | 2.088336572570184       |
| 1.3574187721706195  | 1.8072143416472746  | 1.4297073458365106      | 1.6264929074825472  | 1.4377394095771652      |
| 1.4096271864848742  | 1.4297073458365106  | 1.0923606687290193      | 1.5019959195024015  | 0.7469819278808735      |
| 1.5863325887792743  | 0.5020039837909096  | 1.71082957675942        | 0.2891542946635639  | 1.899583074664802       |
| 0.16064127481309107 | 2.120464827532802   | 0.11646492423949102     | 2.3132343573085112  | 0.09638476488785465     |
| 2.5742764288797844  | 0.16867333855374564 | 2.7027894487302575      | 0.12851301985047286 | 2.8232704048400756      |
| 0.11646492423949102 | 3.032104062097094   | 0.14457714733178195     | 3.1445529544662576  | 0.20080159351636384     |
| 3.3453545479826214  | 0.35742683645912765 | 3.4578034403517854      | 0.5702765255864733  | 3.51001185466604        |
| 0.755013991621528   | 3.5501721733693126  | 0.9357354257862555      | 3.5622202689802944  | 1.2610340072827648      |
| 3.5180439184066943  | 1.5421562382056744  | 3.5341080458880034      | 1.7630379910736744  | 3.59836455581324        |
| 1.9999838714229838  | 3.654589001997822   | 2.2248816561613114      | 3.64254090638684    | 2.4578115046402935      |
| 3.558204237109967   |                     |                         |                     |                         |
| 2.598372620101748   | 3.449771376611131   | 2.7389337355632026      | 3.2971621655386945  | 2.91965516972793        |
| 3.148568986336585   |                     |                         |                     |                         |
| 3.0923445401520033  | 1.6947654492781108  | 3.020055966486112       | NA NA NA NA NA NA   |                         |
| 36                  | 2.2640934553001797  | 1.7859386093275267      | 1.4535188486428963  | 3.395948582738403       |
| 1.3345945792084775  |                     |                         |                     |                         |
| 3.206550672157662   | 1.1672196814859621  | 3.083221800151598       | 1.0967460403396398  | 2.8762054792842764      |
| 0.9910355786201565  | 2.7088305815617613  | 0.9822263734768663      | 2.4357452221197624  | 1.0306770017649627      |
| 2.290393337255473   | 1.101150642911285   | 2.0569494009582803      | 1.1451966686277364  | 1.8323146698043782      |
| 1.131982860912801   |                     |                         |                     |                         |
| 1.5239924897892185  | 1.10555524548293    | 1.1892426943441878      | 1.2244795149173489  | 0.819256078325996       |
| 1.2993577586353162  |                     |                         |                     |                         |
| 0.5593845265989328  | 1.4711372589294767  | 0.3832004237331272      | 1.700176592655024   | 0.2862991671569341      |
| 1.9468343366671519  | 0.2862991671569341  | 2.2507519141106664      | 0.33474979544503064 | 2.5899063121273422      |
| 0.26868075687035353 | 2.832159453567825   | 0.2995129748718695      | 3.052389582150082   | 0.41403264173464316     |
| 3.184527659299436   | 0.5770029368855133  | 3.2417874927308232      | 0.8236606808976412  | 3.294642723590565       |
| 1.1231736557695107  | 3.334284146735371   | 1.352212989495058       | 3.3078565313055     | 1.6297029515087018      |
| 3.334284146735371   |                     |                         |                     |                         |
| 1.9248113238089262  | 3.400353185310048   | 2.197896683250925       | 3.488445236742951   | 2.51943267098102        |
| 3.479636031599661   |                     |                         |                     |                         |
| 2.6956167738468255  | 3.3563071595935967  | 2.8453732612827602      | 3.3122611338771453  | 3.0083435564336307      |
| 3.2505966978741134  | 3.140481633582985   | 3.0964356078665336      | 3.2241690824442424  | 2.99072514614705        |
| 3.4091623904533384  |                     |                         |                     |                         |
| 1.4535188486428963  | 3.395948582738403   | NA NA NA NA NA NA NA NA |                     |                         |
| 37                  | 2.333820563938088   | 1.5534992484150338      | 1.5409706651085526  | 3.0040731317142795      |
| 1.4016275730508645  |                     |                         |                     |                         |
| 2.770468536205802   | 1.2581861547561854  | 2.5737488768302423      | 1.1598263250684053  | 2.3770292174546825      |
| 1.1229413889354878  | 2.196702863027086   | 1.168022977542387       | 1.9794915724665718  | 1.237694523571231       |
| 1.7827719130910118  |                     |                         |                     |                         |
| 1.2786777859411396  | 1.5450689913455435  | 1.2540878285191945      | 1.315562722074057   | 1.2540878285191945      |
| 1.049171516669653   | 1.2704811334671577  | 0.852451857294093       | 1.315562722074057   | 0.6311422404965881      |
| 1.4467091616577636  |                     |                         |                     |                         |
| 0.3729476875661657  | 1.631133842322351   | 0.25819455293042237     | 1.9139183526747183  | 0.18852300690157825     |
| 2.1598179268941684  | 0.2213096167975049  | 2.3524392600327375      | 0.25819455293042237 | 2.6393220966220956      |
| 0.21311296432352325 | 2.8852216708415455  | 0.27868618411537655     | 3.0286630891362245  | 0.43442258112102816     |
| 3.1311212450609953  | 0.6352405667335789  | 3.2253827485117847      | 0.9057300983749738  | 3.2458743796967386      |
| 1.2008095874383138  | 3.208989443563821   | 1.4262175304728095      | 3.184399486141876   | 1.4958890765016535      |
| 3.233579400985766   |                     |                         |                     |                         |
| 1.6885104096402226  | 3.311447599488592   | 1.9508032888076359      | 3.360627514332482   | 2.1557196006571773      |
| 3.409807429176372   |                     |                         |                     |                         |
| 2.3278493026107925  | 3.3278409044365556  | 2.4630940684314897      | 3.266366010881693   | 2.557355571882279       |
| 3.2540710321707205  | 2.651617075333068   | 3.168006181193913       | 2.7827635149167746  | 3.0614496990321514      |
| 2.852435060945619   |                     |                         |                     |                         |
| 2.9753848480553438  | 2.9753848480553438  | 1.5409706651085526      | 3.0040731317142795  | NA NA NA NA NA NA NA NA |
| 36                  | 2.357065234588299   | 1.8518851144391524      | 1.6695873238445955  | 3.431684763258416       |
| 1.4977828235017479  |                     |                         |                     |                         |
| 3.2510697757185     | 1.290736374370624   | 3.070454788178583       | 1.171794797210191   | 2.916271262229874       |
| 1.1101213868307072  |                     |                         |                     |                         |
| 2.7532772490840953  | 1.123337117626311   | 2.5550412871500403      | 1.1673895536116565  | 2.3391843508218475      |
| 1.1850105280057945  | 2.1277326580921887  | 1.1894157716043292      | 1.889849503771323   | 1.101310899633638       |
| 1.555050990282697   |                     |                         |                     |                         |

|                     |                     |                     |                     |                     |
|---------------------|---------------------|---------------------|---------------------|---------------------|
| 1.1189318740277763  | 1.3524097847501075  | 1.1497685792175183  | 1.0792846816409654  | 1.268710156377951   |
| 0.709244219364063   | 1.4757566055090752  | 0.5682764242109573  | 1.7092345162314064  | 0.47136106504319714 |
| 1.9735491321434795  | 0.48017155224026625 | 2.352400081617451   | 0.5550606934153536  | 2.6431461591207315  |
| 0.45814533424759346 | 2.8986502878357356  | 0.4405243598534552  | 3.167370147346343   | 0.5814921550065609  |
| 3.277501237309707   | 0.7709176297435467  | 3.3612008656818637  | 1.044042732852689   | 3.4228742760613473  |
| 1.3039521051662275  | 3.436090006856951   | 1.5594562338812317  | 3.4008480580686746  | 1.7885289010050283  |
| 3.405253301667209   | 1.9559281577493413  | 3.436090006856951   | 2.0308172989244286  | 3.506573904433504   |
| 2.286321427639433   | 3.629920725192471   | 2.471341658777884   | 3.603489263601264   | 2.6916038387046117  |
| 3.506573904433504   | 2.8810293134415974  | 3.4669267120466927  | 3.0484285701859104  | 3.3127431860979835  |
| 3.167370147346343   | 3.110101980565394   | 3.378821840076002   | 1.6695873238445955  | 3.431684763258416   |
| NA                  | NA                  | NA                  | NA                  | NA                  |
| 34                  | 2.2790567197925395  | 1.6804188997073883  | 1.5695503823916357  | 3.2173608946532144  |
| 1.4391168326083974  | 3.056492849920554   | 1.252162077919089   | 2.9086681601662168  | 1.2130320129841174  |
| 2.7695390403974294  | 1.1173807431430758  | 2.6173665656503178  | 1.0739028932153298  | 2.4521507359248824  |
| 1.1086851731575267  | 2.1956314213511803  | 1.182597518034695   | 1.960851031741351   | 1.2478142929263143  |
| 1.7652007070664935  | 1.260857647904638   | 1.4912902525216927  | 1.217379797976892   | 1.2434665079335396  |
| 1.2825965728685111  | 0.9825994083670628  | 1.3434655627673557  | 0.699993383836713   | 1.486942467528918   |
| 0.41738735930636295 | 1.747809567095395   | 0.29130159451589915 | 1.952155461755802   | 0.29999716450144837 |
| 2.2391092712789264  | 0.4217351442991376  | 2.5738887157225716  | 0.32608387445809606 | 2.93040708513009    |
| 0.29130159451589915 | 3.1434485497760463  | 0.40869178932081374 | 3.32605551947258    | 0.669558888872906   |
| 3.3651855844075516  | 0.9652082683959644  | 3.391272294364199   | 1.1782497330419204  | 3.417359004320847   |
| 1.3130310678179336  | 3.3651855844075516  | 1.6738972222182265  | 3.4347501442919453  | 1.9782421717124494  |
| 3.491271349198015   | 2.221718131307828   | 3.547792554104085   | 2.469541875895981   | 3.517358059154663   |
| 2.560845360744248   | 3.4086634343352977  | 2.717365620484134   | 3.247795389602637   | 2.9695371500650616  |
| 3.034753924956681   | 3.2390998196170875  | 1.5695503823916357  | 3.2173608946532144  | NA                  |
| NA                  | NA                  | NA                  | NA                  | NA                  |
| 36                  | 2.43543113652688    | 1.7037603505706327  | 1.6942585295389916  | 3.305550790878909   |
| 1.4890261818886497  | 3.100318443228567   | 1.3798600395214466  | 2.9736857180826113  | 1.3274602911851892  |
| 2.8033865359897745  | 1.2139275031232981  | 2.6898537479278835  | 1.1615277547870406  | 2.5457544400031753  |
| 1.174627691871105   | 2.3099555724900167  | 1.253227314375491   | 2.1090898705343633  | 1.3143603541011248  |
| 1.855824420242452   | 1.3492935196586298  | 1.641858781202734   | 1.3099937084064368  | 1.3230936454905011  |
| 1.2925271256276842  | 0.9912285726942038  | 1.384226685216135   | 0.6375302714244658  | 1.4890261818886497  |
| 0.35806494696442603 | 1.6898918838443033  | 0.1921324105662774  | 1.9693572083043431  | 0.14409930792470804 |
| 2.235722595680319   | 0.1921324105662774  | 2.4365882976359723  | 0.20959899334502988 | 2.895086095578225   |
| 0.13973266223001993 | 3.1658181286488887  | 0.1964990562609655  | 3.3666838306045426  | 0.3536983012697379  |
| 3.454016744498305   | 0.5894971687828965  | 3.5151497842239383  | 0.8383959733801195  | 3.576282823949572   |
| 1.1265945892295355  | 3.5544495954761315  | 1.4715595991098973  | 3.571916178254884   | 1.785958089127442   |
| 3.6636157378433345  | 2.0610567678927936  | 3.7553152974317854  | 2.344888738047522   | 3.7640485888211614  |
| 2.554487731392552   | 3.6636157378433345  | 2.711686976401324   | 3.5981160524230127  | 2.890719449883537   |
| 3.519516429918627   | 3.0173521750294925  | 3.357950539215166   | 3.1527181915648246  | 3.2182178769851464  |
| 3.309917436573597   | 1.6942585295389916  | 3.305550790878909   | NA                  | NA                  |
| NA                  | NA                  | NA                  | NA                  | NA                  |
| 37                  | 2.3098769057229416  | 1.824416662743451   | 1.6184054863255692  | 3.394704190829243   |
| 1.499985572691991   | 3.201723590833782   | 1.3464782772410564  | 3.0613740635643563  | 1.2719175908791738  |
| 2.890323077204743   | 1.1534976772455956  | 2.7061143226636215  | 1.1184102954282389  | 2.5833084863028737  |
| 1.1315680636097476  | 2.3947138090345823  | 1.188585059062952   | 2.2543642817651564  | 1.2412161317889867  |
| 2.0745414499512043  | 1.3113908954237     | 1.8552453135927258  | 1.3070049726965303  | 1.631563254507078   |
| 1.2938472045150216  | 1.3464782772410564  | 1.3245486636052086  | 1.078936990883713   | 1.3815656590584129  |
| 0.815781627253539   | 1.499985572691991   | 0.5263107272603478  | 1.6666506363244347  | 0.3859611999909217  |
| 1.9210341545002694  | 0.3333301272648869  | 2.1271725226772387  | 0.33771604999205646 | 2.3640123499443955  |
| 0.37718935453658253 | 2.6227817908474     | 0.33771604999205646 | 2.929796381749269   | 0.3596456636279043  |
| 3.201723590833782   | 0.5175388818060086  | 3.293827968104343   | 0.7192913272558086  | 3.394704190829243   |
| 0.986832613613152   | 3.412247881737921   | 1.1841991363357824  | 3.3990901135564124  | 1.7192817090504693  |
| 3.4385634181009386  | 2.0087526090436607  | 3.52628187264433    | 2.2806798181281738  | 3.596456636279043   |
| 2.4912041090323127  | 3.587684790824704   | 2.671026940846265   | 3.4999663362813127  | 2.802604622661352   |
| 3.4429493408281084  | 2.9341823044764386  | 3.377160499920565   | 3.0569881408371864  | 3.232425049923969   |
| 3.184179899925104   | 3.12277698174473    | 3.3508449635575475  | 1.6184054863255692  | 3.394704190829243   |
| NA                  | NA                  | NA                  | NA                  | NA                  |

|                     |                     |                     |                     |                     |                    |
|---------------------|---------------------|---------------------|---------------------|---------------------|--------------------|
| 41                  | 2.2046782842924655  | 1.8142734481583276  | 1.561163274366512   | 3.359132213945922   | 1.438375151663528  |
| 3.1924911902775865  | 1.2454223874159815  | 3.096014808153813   | 1.20156948645063    | 2.938144364678548   | 1.1796430359679544 |
| 2.872365013230521   | 1.074396073651111   | 2.749576890527537   | 1.074396073651111   | 2.639944638114158   | 1.0963225241337866 |
| 2.490844774831963   | 1.1621018755818138  | 2.3242037511636275  | 1.20156948645063    | 2.1093245364334052  | 1.232266517126376  |
| 1.9339129325719995  | 1.2673488378986573  | 1.7628866188071288  | 1.2366518072229111  | 1.5743191446561176  |                    |
| 1.2191106468367707  | 1.3243576091536142  | 1.2629635478021222  | 1.0261578825892241  | 1.319972319057079   |                    |
| 0.7454993164109749  | 1.4032928308912467  | 0.5218495214876824  | 1.5962455951387933  | 0.40783197897776857 |                    |
| 1.7848130692898045  | 0.4122172690743037  | 1.9602246731512103  | 0.4560701700396552  | 2.2014156284606434  |                    |
| 0.5437759719703581  | 2.429450713480471   | 0.4604554601361904  | 2.6531005084037633  | 0.4034466888812335  |                    |
| 2.9469149448716183  | 0.40783197897776857 | 3.1091706784434185  | 0.5613171323564987  | 3.205647060567192   |                    |
| 0.7893522173763263  | 3.245114671436008   | 1.017387302396154   | 3.29773815259443    | 1.232266517126376   | 3.2889675724013596 |
| 1.469072182339274   | 3.2582705417256137  | 1.6927219772625663  | 3.2845822823048243  | 1.9032159018962533  |                    |
| 3.363517504042457   | 2.188259758171038   | 3.455608596069695   | 2.4119095530943304  | 3.477535046552371   | 2.5741652866661306 |
| 3.4249115653939493  | 2.740806310334466   | 3.3372057634632464  | 2.8899061736166614  | 3.2801969922082894  |                    |
| 3.082858937864208   | 3.15302357940877    | 3.1574088695053053  | 3.0521619071884616  | 3.293352862497895   | 1.561163274366512  |
| 3.359132213945922   |                     |                     |                     |                     |                    |
| 35                  | 2.319016673994786   | 1.762120336974373   | 1.5477675713302808  | 3.243355641046038   | 1.4434236901170034 |
| 3.0303202169022634  | 1.3129938386004067  | 2.856413748213468   | 1.2303882659732288  | 2.682507279524672   |                    |
| 1.1477826933460509  | 2.5129484725530964  | 1.1477826933460509  | 2.36512797416762    | 1.18691164880103    | 2.2694794163887826 |
| 1.2521265745593284  | 2.1216589180033063  | 1.3260368237520666  | 1.865146876687333   | 1.3738611026414853  |                    |
| 1.612982497088579   | 1.3564704557726057  | 1.391251749510365   | 1.391251749510365   | 1.1521303550632709  | 1.4955956307236422 |
| 0.8347510497062188  | 1.612982497088579   | 0.6217156255624443  | 1.8347132446667935  | 0.4434614951564288  |                    |
| 2.139049564872186   | 0.4217231865703293  | 2.3520849890159603  | 0.4391138334392089  | 2.4738195170981174  |                    |
| 0.46519980374252823 | 2.695550264676332   | 0.46085214202530833 | 2.9477146442750852  | 0.49128577404584756 |                    |
| 3.1390117598327607  | 0.591281993541905   | 3.2694416113493574  | 0.7651884622307007  | 3.360742507410975   |                    |
| 0.9999621949605747  | 3.4085667863003937  | 1.2521265745593284  | 3.399871462865954   | 1.5564628947647206  |                    |
| 3.365090169128195   | 1.9955767282039296  | 3.4259574331692733  | 2.291217724974882   | 3.491172358927572   | 2.5129484725530964 |
| 3.4868246972103516  | 2.6694642943730127  | 3.4085667863003937  | 2.8129371310412687  | 3.317265890238776   |                    |
| 2.973800614578405   | 3.204226685591059   | 3.112925789529441   | 2.9824959380128444  | 3.3346565371076555  | 1.5477675713302808 |
| 3.243355641046038   | NA                  | NA                  | NA                  | NA                  | NA                 |
| 37                  | 2.3311330196982385  | 1.6984265316047762  | 1.6429193285750614  | 3.1858726662579895  | 1.5820704645537629 |
| 3.0467895484950214  | 1.5212216005324644  | 2.964208947323259   | 1.3908311776296818  | 2.8468575667107547  |                    |
| 1.329982313608383   | 2.7121207963778793  | 1.2734797970171774  | 2.6078084580556533  | 1.1691674586949512  |                    |
| 2.364413001970459   | 1.225669975286157   | 2.2122908419172123  | 1.2995578815977338  | 1.990627122982482   | 1.3169432713181048 |
| 1.7993878360584006  | 1.3430213558986615  | 1.5864168119838558  | 1.334328661038476   | 1.3212896187481975  |                    |
| 1.3256359661782904  | 1.0213916460717976  | 1.3821384827694962  | 0.7432254105458611  | 1.5386069902528354  |                    |
| 0.408556658428719   | 1.742885319467195   | 0.26947354066575085 | 1.9732417332621108  | 0.2347027612250088  |                    |
| 2.168827367616285   | 0.2347027612250088  | 2.3687593494005514  | 0.26947354066575085 | 2.6251938477760244  |                    |
| 0.21731737150463776 | 2.890321041011682   | 0.25643449837547255 | 3.1337164970968767  | 0.3694395315578842  |                    |
| 3.268453267429752   | 0.5519861236217799  | 3.355380216031607   | 0.8518840962981801  | 3.4162290800529056  |                    |
| 1.1517820689745801  | 3.4162290800529056  | 1.3821384827694962  | 3.390150995472349   | 1.6429193285750614  |                    |
| 3.450998594936477   | 1.9645490384019253  | 3.568351240106152   | 2.25575431621814    | 3.572697587536245   | 2.468725340292685  |
| 3.48577063893439    | 2.6382328900663023  | 3.446653512063555   | 2.7295061860982504  | 3.3249557840209576  | 2.9250918204524243 |
| 3.1945653611181752  | 3.055482243355207   | 3.1206774548065983  | 3.1641409291075258  | 1.6429193285750614  |                    |
| 3.1858726662579895  | NA                  | NA                  | NA                  | NA                  | NA                 |
| 36                  | 1.9062061855670103  | 1.3386907216494845  | 1.4192439862542956  | 2.5670103092783507  | 1.3127147766323024 |
| 2.457044673539519   | 1.2199312714776633  | 2.3539518900343643  | 1.1134020618556701  | 2.3024054982817868  |                    |
| 1.092783505154639   | 2.2061855670103094  | 1.0206185567010309  | 2.0859106529209623  | 0.9759450171821306  |                    |
| 1.9828178694158076  | 0.9862542955326461  | 1.8144329896907216  | 1.0309278350515463  | 1.6460481099656357  |                    |
| 1.0756013745704467  | 1.443298969072165   | 1.0996563573883162  | 1.2852233676975946  | 1.0756013745704467  |                    |
| 1.0515463917525774  | 1.0687285223367697  | 0.7972508591065293  | 1.1134020618556701  | 0.5463917525773195  |                    |
| 1.1890034364261168  | 0.3436426116838488  | 1.388316151202749   | 0.19243986254295534 | 1.5910652920962198  |                    |
| 0.14432989690721648 | 1.8041237113402062  | 0.15807560137457044 | 1.9518900343642611  | 0.1958762886597938  |                    |

|                     |                     |                     |                     |                     |
|---------------------|---------------------|---------------------|---------------------|---------------------|
| 2.1718213058419242  | 0.140893470790378   | 2.529209621993127   | 0.15807560137457044 | 2.6597938144329896  |
| 0.2920962199312715  | 2.745704467353952   | 0.5017182130584192  | 2.8247422680412373  | 0.7285223367697594  |
| 2.845360824742268   | 0.9896907216494846  | 2.821305841924399   | 1.1821305841924399  | 2.8350515463917527  |
| 1.3402061855670102  | 2.8969072164948453  | 1.5326460481099657  | 2.9587628865979383  | 1.7766323024054982  |
| 2.9690721649484537  | 2.0034364261168385  | 2.8900343642611683  | 2.1305841924398625  | 2.8419243986254297  |
| 2.2646048109965635  | 2.70446735395189    | 2.3848797250859106  | 2.5876288659793816  | 2.515463917525773   |
| 2.5670103092783507  | NA                  | NA                  | NA                  | NA                  |
| 39                  | 2.4437948955741717  | 1.7139589501929264  | 1.736154493919108   | 3.3446505691676935  |
| 3.1744393442736634  | 1.4382848503545551  | 3.021249241869036   | 1.3276475541734356  | 2.8255063332409014  |
| 1.2212655386146667  | 2.655295108346871   | 1.195733854880562   | 2.451041638474035   | 1.246797222348771   |
| 1.3063711510616818  | 2.02976885686131    | 1.35317923790754    | 1.7829625807649663  | 1.3148817123063832  |
| 1.3148817123063832  | 1.2978605898169802  | 1.3616897991522416  | 0.9957356656300766  | 1.4084978859980999  |
| 0.7957374763795911  | 1.5319010240462718  | 0.5787181646397027  | 1.7574308970308619  | 0.399996378500971   |
| 1.910620999435489   | 0.36595413352216494 | 2.0893427855742206  | 0.38297525601156795 | 2.327638500425863   |
| 0.4042516591233217  | 2.557423654032804   | 0.3702094141445157  | 2.7829535270173937  | 0.3616988528998142  |
| 2.9276330681773195  | 0.37446469476686645 | 3.0638020480925436  | 0.4553150265915308  | 3.2425238342312754  |
| 0.625526251485561   | 3.365926972279447   | 0.9148853338054123  | 3.434011462237059   | 1.12764936492295    |
| 1.4170084472428013  | 3.434011462237059   | 1.6382830396050407  | 3.434011462237059   | 1.7616861776532124  |
| 3.4808195490829177  | 1.961684366903698   | 3.5531593196628806  | 2.170193117398885   | 3.625499090242843   |
| 3.629754370865194   | 2.5744447765222067  | 3.5659251615299326  | 2.693592633948028   | 3.510606513439373   |
| 3.4127350591253056  | 2.9957175581349316  | 3.3063530435665367  | 3.123375976805454   | 3.1872051861407154  |
| 3.2765660792100815  | 1.736154493919108   | 3.3446505691676935  | NA                  | NA                  |
| 39                  | 2.166531498633876   | 1.636506423963107   | 1.3546884845286409  | 3.196552007657487   |
| 3.0085195366188113  | 1.1367417567338123  | 2.8717686485906837  | 1.0598193822179904  | 2.713650434308161   |
| 0.9615296814477735  | 2.542711824273001   | 0.8846073069319517  | 2.380320144739599   | 0.9615296814477735  |
| 2.1580999516938917  | 1.0854601737232643  | 1.893145106139394   | 1.1239213609811753  | 1.6751983783445654  |
| 1.0854601737232643  | 1.4743455115532527  | 1.0555459169671113  | 1.2093906659987552  | 1.0555459169671113  |
| 1.0042643339565636  | 1.0854601737232643  | 0.6837544401406389  | 1.1581090829882073  | 0.4615342470949313  |
| 1.311953832019851   | 0.2777752413071346  | 1.5256270945638006  | 0.17948554053691773 | 1.7264799613551134  |
| 0.16666514478428074 | 1.901692036641152   | 0.18375900578779672 | 2.162373416944771   | 0.1923059362895547  |
| 2.4572425192554213  | 0.15384474903164377 | 2.773478947820467   | 0.17948554053691773 | 2.9828787451135375  |
| 0.35897108107383546 | 3.1409969593960603  | 0.67948097488976    | 3.2008254729083663  | 0.9487092856951366  |
| 3.235013194915398   | 1.205117200747876   | 3.209372403410124   | 1.3974231370374308  | 3.153817355148697   |
| 3.1751846814030924  | 1.7991288706200563  | 3.277747847424188   | 2.046989855171038   | 3.358943687190889   |
| 3.3888579439470417  | 2.452969054004542   | 3.3333028956856148  | 2.572626081029154   | 3.273474382173309   |
| 3.243560125417156   | 2.816213600329257   | 3.123903098392544   | 2.9230502316012315  | 3.0256133976223274  |
| 2.9059563705977154  | 3.2179193339118823  | 1.3546884845286409  | 3.196552007657487   | NA                  |
| 38                  | 2.2716633227117096  | 1.628327277323524   | 1.6539937155160862  | 3.1307738186554492  |
| 3.004192666957789   | 1.4725607314161073  | 2.8987083738764063  | 1.4092701555672775  | 2.7805659656252573  |
| 1.350198951441703   | 2.632887955311321   | 1.257372773530086   | 2.476771201550874   | 1.2531534018068307  |
| 1.30800523420915    | 2.0885890030113843  | 1.3712958100579797  | 1.9113753906346609  | 1.3966120403975117  |
| 1.6961874327486395  | 1.3670764383347245  | 1.455683244523086   | 1.3333214645486817  | 1.2278371714672986  |
| 1.388173296951001   | 0.9367005225626815  | 1.4345863859068095  | 0.654002617104575   | 1.5485094224347031  |
| 0.4430340309418088  | 1.6835293175788735  | 0.367085339923213   | 1.8438654430625758  | 0.33754973786042575 |
| 2.021079055439299   | 0.33333036613717043 | 2.2067314112625334  | 0.3628659681999577  | 2.3037769608974057  |
| 0.37130471164646833 | 2.5611586360159806  | 0.33754973786042575 | 2.894489002153151   | 0.37130471164646833 |
| 3.0463863841903427  | 0.49366649162087267 | 3.1476513055484703  | 0.7046350777836388  | 3.1982837662275343  |
| 0.9071649204998943  | 3.248916226906598   | 1.1054753914928943  | 3.2446968551833426  | 1.350198951441703   |
| 1.5949225113905119  | 3.2446968551833426  | 1.873401045125363   | 3.3333036613717044  | 2.1392214636904483  |
| 3.4008136089437895  | 2.3797256519160017  | 3.350181148264726   | 2.527403662229938   | 3.282671200692641   |
| 3.248916226906598   | 2.7847853373485125  | 3.143431933825215   | 2.907147117322917   | 3.0168507821275554  |
| 1.6539937155160862  | 3.1307738186554492  | NA                  | NA                  | NA                  |
| 38                  | 1.9837083034681176  | 1.4465727128509673  | 1.4322248237597477  | 2.7948530448304028  |
|                     |                     |                     |                     | 1.3479763047150566  |

|                     |                               |                     |                     |                     |                    |
|---------------------|-------------------------------|---------------------|---------------------|---------------------|--------------------|
| 2.659322818541117   | 1.2490758693147672            | 2.53844450860743    | 1.1721533084478752  | 2.4871628013628353  | 1.1428494757366785 |
| 2.3662844914291483  | 1.0512749985141883            | 2.2051134115175652  | 0.996330312180694   | 2.0842351015838783  |                    |
| 1.0329601030696902  | 1.9413789171167934            | 1.0512749985141883  | 1.8314895444498052  | 1.117208622114381   |                    |
| 1.6446776109159251  | 1.1648273502700761            | 1.4065839701374503  | 1.1245345802921805  | 1.2087830993368713  |                    |
| 1.1208716012032807  | 0.9853413749139952            | 1.1684903293589757  | 0.7875405041134163  | 1.2161090575146707  |                    |
| 0.6117175078462349  | 1.3113465138260605            | 0.4249055743123548  | 1.4725175937376433  | 0.3076902434675673  |                    |
| 1.6483405900048247  | 0.2490825780451735            | 1.8021857117386082  | 0.2490825780451735  | 2.0659202061393804  |                    |
| 0.30036428528976805 | 2.3516325750735496            | 0.26373449440077196 | 2.5714113204075266  | 0.2783864107563704  |                    |
| 2.6776377139856153  | 0.3223421598231657            | 2.8058419820971015  | 0.40292769977895715 | 2.8937534802306923  |                    |
| 0.5934026124017369  | 2.9670130620086845            | 0.8534741277136092  | 3.00730583198658    | 1.1062196848476824  | 2.981664978364283  |
| 1.3186724720038596  | 2.963350082919785             | 1.494495468271041   | 3.025620727431078   | 1.758229962671813   | 3.113532225564669  |
| 2.0549312688726813  | 3.0732394555867732            | 2.1758095788063687  | 2.9670130620086845  | 2.3662844914291483  |                    |
| 2.8937534802306923  | 2.5237925922518314            | 2.754560274852507   | 2.6849636721634145  | 2.6776377139856153  |                    |
| 2.7948530448304028  | 1.4322248237597477            | 2.7948530448304028  | NA NA NA NA NA NA   |                     |                    |
| 36                  | 2.159268813712979             | 1.6563664347600522  | 1.4748847791272701  | 3.1997500292930607  | 1.337395520056084  |
| 3.0205973583821213  | 1.2249043080887498            | 2.891440781678886   | 1.116579437305391   | 2.687290063664094   | 1.0374189548098596 |
| 2.5747988516967597  | 0.9915892017861309            | 2.478973004465327   | 1.0082545665220322  | 2.291487651186437   |                    |
| 1.0832487078335882  | 2.0706715684357437            | 1.1457438255932184  | 1.8081920738452975  | 1.1624091903291198  |                    |
| 1.5123818497830483  | 1.154076507961169             | 1.2290706492727252  | 1.1624091903291198  | 0.9957555429701062  |                    |
| 1.2082389433528484  | 0.7707731190354378            | 1.2998984494003059  | 0.5166263068129421  | 1.5248808733349744  |                    |
| 0.32497461235007646 | 1.7123662266138646            | 0.2541468122224957  | 1.9665130388363603  | 0.26664583577442175 |                    |
| 2.224826192242831   | 0.27081217695839704           | 2.478973004465327   | 0.24998047103852036 | 2.6456266518243408  |                    |
| 0.24998047103852036 | 2.8372783462872064            | 0.28747754169429846 | 3.0122646760141705  | 0.4791292361571641  |                    |
| 3.166419299821258   | 0.7957711661392899            | 3.2497461235007647  | 1.0832487078335882  | 3.2455797823167893  |                    |
| 1.3123974729522319  | 3.2080827116610116            | 1.6123740381984564  | 3.2664114882366664  | 1.9206832858126315  |                    |
| 3.3580709942841236  | 2.183162780403078             | 3.4163997708597784  | 2.4123115455217214  | 3.3580709942841236  |                    |
| 2.5747988516967597  | 3.2580788058687156            | 2.7664505461596254  | 3.116423205613554   | 2.9497695582545402  |                    |
| 3.0247636995660967  | 3.0705934525898253            | 2.9372705347026145  | 3.203916370477036   | 1.4748847791272701  |                    |
| 3.1997500292930607  | NA |                     |                     |                     |                    |
| 43                  | 2.30047652217684              | 1.587538131548079   | 1.5141722029234126  | 3.0650763460794685  | 1.4529523025356734 |
| 2.9344738919189584  | 1.3713257686853548            | 2.840603377991092   | 1.2733739280649723  | 2.7508141907557415  |                    |
| 1.2529672946023926  | 2.6161304099027154            | 1.15501545398201    | 2.477365302357174   | 1.085632900209239   | 2.3508441748891795 |
| 1.1142021870568508  | 2.175347127110994             | 1.1795034141371057  | 1.987606099255261   | 1.2529672946023926  |                    |
| 1.7794584379369485  | 1.3019432149125838            | 1.5794734300036675  | 1.3141871949901316  | 1.420301688995546   |                    |
| 1.3060245416050997  | 1.2448046412173608            | 1.3223498483751635  | 0.9795184062038248  | 1.363163115300323   |                    |
| 0.7672894181929961  | 1.41622036230303              | 0.5509791034896514  | 1.5223348563084445  | 0.387726035789014   | 1.7019132307791456 |
| 0.2693675617060518  | 1.869247625172299             | 0.23671694816592434 | 2.0937205932606755  | 0.22447296808837652 |                    |
| 2.277380294423893   | 0.2693675617060518            | 2.4569586688945937  | 0.33058746209379086 | 2.705919597138066   |                    |
| 0.2856928684761156  | 2.958961852074054             | 0.2775302150910837  | 3.1344588998522394  | 0.3714007290189502  |                    |
| 3.2364920671651376  | 0.5305724700270718            | 3.301793294245393   | 0.8040213584256395  | 3.346687887863068   |                    |
| 1.0162503464364683  | 3.3875011547882274            | 1.2121540276772331  | 3.3793385014031956  | 1.4039763822254823  |                    |
| 3.3140372743229407  | 1.5835547566961834            | 3.293630640860361   | 1.673343943931534   | 3.3221999277079726  | 1.861084971787267  |
| 3.3834198280957115  | 2.0814766131831277            | 3.4323957484059027  | 2.2447296808837653  | 3.4528023818684823  |                    |
| 2.3630881549667273  | 3.424233095020871             | 2.530422549359881   | 3.342606561170552   | 2.6732689835979384  | 3.2773053340902973 |
| 2.8120340911434805  | 3.089564306234564             | 2.9712058321516017  | 2.9385552186114743  | 3.154865533314819   |                    |
| 1.5141722029234126  | 3.0650763460794685            |                     |                     |                     |                    |
| 41                  | 2.373276859504132             | 1.608285123966942   | 1.7231404958677685  | 3.0289256198347108  | 1.615702479338843  |
| 2.9132231404958677  | 1.524793388429752             | 2.8388429752066116  | 1.43801652892562    | 2.760330578512397   | 1.3677685950413223 |
| 2.603305785123967   | 1.2520661157024793            | 2.3925619834710745  | 1.2479338842975207  | 2.2231404958677685  |                    |
| 1.3016528925619835  | 2.0702479338842976            | 1.359504132231405   | 1.859504132231405   | 1.4090909090909092  |                    |
| 1.6446280991735538  | 1.4049586776859504            | 1.4504132231404958  | 1.3760330578512396  | 1.2355371900826446  |                    |
| 1.4132231404958677  | 0.9958677685950413            | 1.43801652892562    | 0.8264462809917356  | 1.5082644628099173  |                    |
| 0.5619834710743802  | 1.6239669421487604            | 0.4214876033057851  | 1.8305785123966942  | 0.30578512396694213 |                    |



|                     |                     |                     |                     |                     |
|---------------------|---------------------|---------------------|---------------------|---------------------|
| 1.975206611570248   | 0.30165289256198347 | 2.190082644628099   | 0.34710743801652894 | 2.384297520661157   |
| 0.40082644628099173 | 2.5702479338842976  | 0.3347107438016529  | 2.8801652892561984  | 0.30991735537190085 |
| 3.0991735537190084  | 0.4214876033057851  | 3.1735537190082646  | 0.5867768595041323  | 3.2231404958677685  |
| 0.743801652892562   | 3.293388429752066   | 0.9380165289256198  | 3.322314049586777   | 1.1239669421487604  |
| 3.3181818181818183  | 1.322314049586777   | 3.28099173553719    | 1.487603305785124   | 3.3057851239669422  |
| 1.6735537190082646  | 3.347107438016529   | 1.884297520661157   | 3.4214876033057853  | 2.12396694214876    |
| 3.458677685950413   | 2.268595041322314   | 3.446280991735537   | 2.396694214876033   | 3.355371900826446   |
| 2.553719008264463   | 3.3181818181818183  | 2.677685950413223   | 3.206611570247934   | 2.7975206611570247  |
| 3.1115702479338845  | 2.9008264462809916  | 3.041322314049587   | 2.9958677685950414  | 1.7231404958677685  |
| 3.0289256198347108  | 36                  | 1.720221535803051   | 1.3054074100914579  | 1.190304292927946   |
| 2.6332022294132758  | 1.0380560694139063  | 2.3875289596519846  | 0.9480912100647011  | 2.2698826051184087  |
| 0.8858078458998667  | 2.1418556898906935  | 0.8166041079389397  | 2.0172889615610248  | 0.8062235472448006  |
| 1.8650407380469851  | 0.8546661638174495  | 1.7024119538388063  | 0.9100291541861912  | 1.4809599923638397  |
| 0.9446310231666548  | 1.2871895260732438  | 0.9204097148803303  | 1.103799620476787   | 0.9134893410842376  |
| 0.8996485934920522  | 0.9584717707588402  | 0.7197188747936417  | 0.9896134528412573  | 0.5259484085030459  |
| 1.0311356956178137  | 0.3702399980909599  | 1.1384014894572505  | 0.2352927090671521  | 1.2802691522771512  |
| 0.14186766281990054 | 1.4671192447716543  | 0.09342504624725156 | 1.7335536359212236  | 0.10380560694139063 |
| 1.961925971192283   | 0.07958429865506615 | 2.176457558871157   | 0.1141861676355297  | 2.3460067168754284  |
| 0.22491214837301304 | 2.491334566593375   | 0.44290392294993336 | 2.563998491452349   | 0.6781966320170855  |
| 2.595140173534766   | 0.9619319576568865  | 2.5536179307582096  | 1.1972246667240387  | 2.563998491452349   |
| 1.3806145723204954  | 2.615901294923044   | 1.5986063468974157  | 2.692025406680064   | 1.8373592428626142  |
| 2.712786528068342   | 1.9446250367020512  | 2.6470429770054613  | 2.0934130733180445  | 2.570918865248441   |
| 2.2525816706281767  | 2.4671132583070507  | 2.422130828632448   | 2.373688212059799   | 2.5536179307582096  |
| 2.3287057823851964  | 2.6228216687191366  | 1.190304292927946   | 2.6332022294132758  | NA                  |
| NA                  | NA                  | NA                  | NA                  | NA                  |
| 42                  | 1.8597166519318544  | 1.4330143320152555  | 1.3081884928422216  | 2.6608964893675555  |
| 1.2396969487143568  | 2.5376117099373987  | 1.1506579413481322  | 2.407477776094455   | 1.092440128839447   |
| 2.3013158826962643  | 1.0410714707435482  | 2.1814556804725007  | 0.9554570405837168  | 2.06502005545513    |
| 0.9588816177901102  | 1.9622827392633324  | 0.9999765442668291  | 1.7842047245308834  | 1.065043511188301   |
| 1.599277555385648   | 1.1027138604586266  | 1.448596158304345   | 1.1129875920778063  | 1.287641029603862   |
| 1.092440128839447   | 1.1438087869353457  | 1.092440128839447   | 1.0034011214732224  | 1.109563014871413   |
| 0.8492951471855261  | 1.1677808273800985  | 0.6575188236275041  | 1.215724908269604   | 0.4862899633078416  |
| 1.3047639156358284  | 0.35615602946489805 | 1.438322426685165   | 0.26711702209867355 | 1.5958529781792548  |
| 0.21917294120916803 | 1.7259869120221982  | 0.21574836400277478 | 1.873243731897108   | 0.2362958272411343  |
| 2.1129641363446354  | 0.22602209562195452 | 2.34925996358577    | 0.2910890625434263  | 2.5136396694926457  |
| 0.4280721507991563  | 2.575282059207724   | 0.5856027022932458  | 2.616376985684443   | 0.7568315626129083  |
| 2.6643210665739487  | 0.9314850001389641  | 2.6745947981931284  | 1.1677808273800985  | 2.626650717303623   |
| 1.3492834193189407  | 2.6300752945100165  | 1.5068139708130301  | 2.667745643780342   | 1.708864025990232   |
| 2.7191143018762407  | 1.8903666179290743  | 2.74993549673378    | 2.732812610701814   | 2.1163887135510286  |
| 2.671170220986735   | 2.20200314371086    | 2.61295240847805    | 2.2910421510770846  | 2.554734595969365   |
| 2.4143269305072415  | 2.4828184746351067  | 2.503365937873466   | 2.424600662126421   | 2.599254099652477   |
| 2.366382849617736   | 2.6882931070187017  | 1.3081884928422216  | 2.6608964893675555  | 40                  |
| 1.8257748210822227  | 1.2953612892401112  | 1.3448742637535887  | 2.6130976627336566  | 1.2508027478951769  |
| 2.4632800634035936  | 1.1462788413858307  | 2.3517878964602907  | 1.0731121068292884  | 2.2124226877811624  |
| 0.9999453722727459  | 2.118351171922751   | 0.9651040701029638  | 2.0068590049794484  | 0.9720723305369202  |
| 1.8640096660833416  | 1.034786674442528   | 1.6270888113288235  | 1.0661438463953319  | 1.4737870817817822  |
| 1.0591755859613754  | 1.3309377428856757  | 1.06962797661231    | 1.202024924857482   | 1.0487231953104408  |
| 0.9651040701029638  | 1.0765962370462665  | 0.8118023405559226  | 1.1288581903009396  | 0.616691048405143   |
| 1.1567312320367653  | 0.41461149582040685 | 1.2368662270272641  | 0.28569867779221314 | 1.3831996961403488  |
| 0.19511129215077969 | 1.515966443855209   | 0.16723825041495402 | 1.6375412019797582  | 0.18465890149984507 |
| 1.836136624347516   | 0.20904781301869252 | 1.9824700934606008  | 0.18117477128286685 | 2.170613125177424   |
| 0.1637541201979758  | 2.3273989849414436  | 0.21601607345264895 | 2.456311802969637   | 0.33796063104688623 |
| 2.5259944073092013  | 0.5191354023297531  | 2.5782563605638744  | 0.7037943038295982  | 2.6235500533845912  |
| 0.9093579866313125  | 2.6235500533845912  | 1.1149216694330268  | 2.6130976627336566  | 1.2926123104989153  |
| 2.640970704469482   | 1.4981759933006298  | 2.693232657724155   | 1.686319025017453   | 2.721105699459981   |
| 1.801295322177734   | 2.7420104807618504  |                     |                     |                     |

|                     |                     |                     |                     |                     |                    |
|---------------------|---------------------|---------------------|---------------------|---------------------|--------------------|
| 1.9406605308568623  | 2.700200918158112   | 2.069573348885056   | 2.602645272082722   | 2.205454427347206   | 2.5294785375261797 |
| 2.3831450684130946  | 2.456311802969637   | 2.491153105139419   | 2.3901133288470513  | 2.5956770116487653  |                    |
| 1.3448742637535887  | 2.6130976627336566  |                     |                     |                     |                    |
| 41                  | 1.8571944444444444  | 1.3279930555555555  | 1.2951388888888888  | 2.6423611111111111  | 1.2222222222222223 |
| 2.5069444444444446  | 1.1215277777777777  | 2.375               | 1.0486111111111112  | 2.2534722222222223  | 1.0                |
| 0.9236111111111112  | 2.0381944444444446  | 0.9131944444444444  | 1.8958333333333333  | 0.9548611111111112  |                    |
| 1.7326388888888888  | 1.0069444444444444  | 1.5729166666666667  | 1.0347222222222223  | 1.3680555555555556  | 1.03125            |
| 1.1666666666666667  | 1.0138888888888888  | 0.9930555555555556  | 1.0416666666666667  | 0.7847222222222222  |                    |
| 1.1076388888888888  | 0.5798611111111112  | 1.1597222222222223  | 0.40625             | 1.2326388888888888  | 0.28125            |
| 0.1909722222222222  | 1.4791666666666667  | 0.1180555555555555  | 1.6215277777777777  | 0.125               | 1.9097222222222223 |
| 0.1527777777777778  | 2.1423611111111111  | 0.1319444444444445  | 2.3541666666666665  | 0.1840277777777778  |                    |
| 2.4895833333333335  | 0.2916666666666667  | 2.5520833333333335  | 0.4027777777777778  | 2.5833333333333335  |                    |
| 0.5520833333333334  | 2.6284722222222223  | 0.7083333333333334  | 2.6909722222222223  | 0.8611111111111112  |                    |
| 2.6944444444444446  | 0.9722222222222222  | 2.670138888888889   | 1.1527777777777777  | 2.6597222222222223  |                    |
| 1.3993055555555556  | 2.6944444444444446  | 1.5868055555555556  | 2.7465277777777777  | 1.7743055555555556  | 2.78125            |
| 1.9444444444444444  | 2.7465277777777777  | 2.0798611111111111  | 2.6666666666666665  | 2.2152777777777777  |                    |
| 2.5798611111111111  | 2.4027777777777777  | 2.5                 | 2.5                 | 2.4270833333333335  | 2.6145833333333335 |
| 2.6840277777777777  | 1.2951388888888888  | 2.6423611111111111  |                     |                     |                    |
| 37                  | 1.8772110726643598  | 1.4523979238754325  | 1.4152249134948096  | 2.612456747404844   | 1.3460207612456747 |
| 2.4844290657439445  | 1.2629757785467128  | 2.3529411764705883  | 1.1833910034602075  | 2.2422145328719725  |                    |
| 1.1038062283737025  | 2.141868512110727   | 1.0311418685121108  | 2.0207612456747404  | 1.055363321799308   |                    |
| 1.8823529411764706  | 1.0830449826989619  | 1.7647058823529411  | 1.1280276816608996  | 1.5916955017301038  |                    |
| 1.1487889273356402  | 1.439446366782007   | 1.1453287197231834  | 1.301038062283737   | 1.1211072664359862  |                    |
| 1.0865051903114187  | 1.1384083044982698  | 0.903114186851211   | 1.193771626297578   | 0.6920415224913494  | 1.273356401384083  |
| 0.4844290657439446  | 1.356401384083045   | 0.36678200692041524 | 1.560553633217993   | 0.25259515570934254 |                    |
| 1.6955017301038062  | 0.2422145328719723  | 1.8996539792387543  | 0.2422145328719723  | 2.1557093425605536  |                    |
| 0.23875432525951557 | 2.3771626297577853  | 0.3391003460207612  | 2.519031141868512   | 0.5224913494809689  |                    |
| 2.612456747404844   | 0.7820069204152249  | 2.667820069204152   | 1.0311418685121108  | 2.643598615916955   | 1.245674740484429  |
| 2.6539792387543253  | 1.3944636678200693  | 2.7024221453287196  | 1.5916955017301038  | 2.7474048442906573  |                    |
| 1.7750865051903115  | 2.792387543252595   | 1.9169550173010381  | 2.7750865051903113  | 2.0346020761245676  |                    |
| 2.7335640138408306  | 2.110726643598616   | 2.671280276816609   | 2.2422145328719725  | 2.57439446366782    | 2.3806228373702423 |
| 2.4982698961937717  | 2.508650519031142   | 2.43598615916955    | 2.615916955017301   | 1.4152249134948096  | 2.612456747404844  |
| NA                  | NA                  |                     |                     |                     |                    |
| 38                  | 1.8934259042591524  | 1.5350050490001226  | 1.3878212659699134  | 2.640418921409425   | 1.3024168803717648 |
| 2.5478975036780973  | 1.249039139372922   | 2.4447005377470012  | 1.2134539787070269  | 2.3486206039490845  |                    |
| 1.1707517859079526  | 2.23118957375163    | 1.1031399806427518  | 2.127992607820534   | 1.0675548199768565  | 2.039029706155796  |
| 1.063996303910267   | 1.882454999225857   | 1.0960229485095727  | 1.7579069368952236  | 1.1351666252420574  |                    |
| 1.5977737138986952  | 1.1636347537747735  | 1.4056138463028611  | 1.1565177216415945  | 1.1885443662409003  |                    |
| 1.152959205575005   | 1.0355281753775507  | 1.2098954626404372  | 0.7793150185831053  | 1.2703902357724592  |                    |
| 0.5480114742547864  | 1.398496814169682   | 0.40211231552461596 | 1.5657470692993896  | 0.3024738656601093  |                    |
| 1.7294388083625074  | 0.28823980139375127 | 1.8788964831592674  | 0.30603238172669883 | 2.1173170596207656  |                    |
| 0.2775642531939827  | 2.3699717003486214  | 0.3665271548587207  | 2.5265464072785604  | 0.5942721831204502  |                    |
| 2.6083922768101195  | 0.8469268238483061  | 2.6439774374760145  | 1.1209325609756993  | 2.6297433732096565  |                    |
| 1.2846243000388173  | 2.6297433732096565  | 1.4340819748355773  | 2.6795625981419096  | 1.6048907460318742  |                    |
| 2.729381823074163   | 1.7579069368952236  | 2.7614084676734687  | 1.8504283546265512  | 2.7507329194737     | 1.9429497723578788 |
| 2.7080307266746257  | 2.120875575687355   | 2.647535953542604   | 2.2276310576850404  | 2.587041180410582   | 2.3592961521488527 |
| 2.519429375145381   | 2.4482590538135907  | 2.490961246612665   | 2.537221955478329   | 2.4482590538135907  | 2.611950792876709  |
| 1.3878212659699134  | 2.640418921409425   |                     |                     |                     |                    |
| 41                  | 1.7450714285714288  | 1.282921768707483   | 1.2993197278911566  | 2.496598639455782   | 1.2142857142857142 |
| 2.360544217687075   | 1.119047619047619   | 2.2346938775510203  | 1.0748299319727892  | 2.13265306122449    | 1.0034013605442176 |
| 2.0170068027210886  | 0.9591836734693877  | 1.9149659863945578  | 0.9625850340136054  | 1.816326530612245   |                    |
| 0.9727891156462585  | 1.7040816326530612  | 1.0068027210884354  | 1.6054421768707483  | 1.0204081632653061  |                    |
| 1.510204081632653   | 1.0680272108843538  | 1.3639455782312926  | 1.0816326530612246  | 1.2380952380952381  |                    |

|                                                                                                                |                     |                     |                       |                     |
|----------------------------------------------------------------------------------------------------------------|---------------------|---------------------|-----------------------|---------------------|
| 1.0816326530612246                                                                                             | 1.1360544217687074  | 1.0680272108843538  | 0.9931972789115646    | 1.0714285714285714  |
| 0.8197278911564626                                                                                             | 1.1224489795918366  | 0.673469387755102   | 1.1666666666666667    | 0.5272108843537415  |
| 1.227891156462585                                                                                              | 0.36054421768707484 | 1.3129251700680271  | 0.24149659863945577   | 1.4761904761904763  |
| 0.1598639455782313                                                                                             | 1.6428571428571428  | 0.15306122448979592 | 1.8401360544217686    | 0.1836734693877551  |
| 2.0170068027210886                                                                                             | 0.1564625850340136  | 2.1904761904761907  | 0.15306122448979592   | 2.3469387755102042  |
| 0.23809523809523808                                                                                            | 2.4489795918367347  | 0.36054421768707484 | 2.506802721088435     | 0.54421768707483    |
| 2.574829931972789                                                                                              | 0.7551020408163265  | 2.5884353741496597  | 0.9863945578231292    | 2.574829931972789   |
| 1.1394557823129252                                                                                             | 2.574829931972789   | 1.3503401360544218  | 2.622448979591837     | 1.5476190476190477  |
| 2.6802721088435373                                                                                             | 1.7755102040816326  | 2.6904761904761907  | 1.9217687074829932    | 2.639455782312925   |
| 2.0306122448979593                                                                                             | 2.568027210884354   | 2.1666666666666665  | 2.5 2.295918367346939 | 2.4183673469387754  |
| 2.4183673469387754 2.32312925170068 2.5510204081632653 1.2993197278911566 2.496598639455782                    |                     |                     |                       |                     |
| 44                                                                                                             | 1.8503523489932885  | 1.3396442953020133  | 1.342281879194631     | 2.51006711409396    |
| 2.365771812080537                                                                                              | 1.2046979865771812  | 2.2818791946308723  | 1.1711409395973154    | 2.1711409395973154  |
| 1.1140939597315436                                                                                             | 2.0704697986577183  | 1.0536912751677852  | 1.9697986577181208    | 1.0503355704697988  |
| 1.8624161073825503                                                                                             | 1.080536912751678   | 1.7315436241610738  | 1.1140939597315436    | 1.5939597315436242  |
| 1.157718120805369                                                                                              | 1.4664429530201342  | 1.1711409395973154  | 1.2986577181208054    | 1.1711409395973154  |
| 1.151006711409396                                                                                              | 1.1644295302013423  | 0.959731543624161   | 1.1946308724832215    | 0.8120805369127517  |
| 1.2281879194630871                                                                                             | 0.6677852348993288  | 1.238255033557047   | 0.5805369127516778    | 1.2852348993288591  |
| 0.48322147651006714                                                                                            | 1.3389261744966443  | 0.40939597315436244 | 1.4328859060402686    | 0.3422818791946309  |
| 1.5570469798657718                                                                                             | 0.2953020134228188  | 1.6778523489932886  | 0.28523489932885904   | 1.8724832214765101  |
| 0.2953020134228188                                                                                             | 2.063758389261745   | 0.2751677852348993  | 2.2449664429530203    | 0.32550335570469796 |
| 2.37248322147651                                                                                               | 0.40604026845637586 | 2.4328859060402683  | 0.5134228187919463    | 2.4731543624161074  |
| 0.6610738255033557                                                                                             | 2.51006711409396    | 0.8221476510067114  | 2.5503355704697985    | 0.9765100671140939  |
| 2.5503355704697985                                                                                             | 1.1275167785234899  | 2.540268456375839   | 1.2751677852348993    | 2.5503355704697985  |
| 1.4060402684563758                                                                                             | 2.587248322147651   | 1.5469798657718121  | 2.6308724832214767    | 1.6979865771812082  |
| 2.6711409395973154                                                                                             | 1.8389261744966443  | 2.684563758389262   | 1.9328859060402686    | 2.640939597315436   |
| 2.0503355704697985                                                                                             | 2.5805369127516777  | 2.164429530201342   | 2.530201342281879     | 2.2751677852348995  |
| 2.4496644295302015 2.3691275167785233 2.402684563758389 2.4563758389261743 2.348993288590604 2.540268456375839 |                     |                     |                       |                     |
| 1.342281879194631 2.51006711409396                                                                             |                     |                     |                       |                     |
| 47                                                                                                             | 1.798342372881356   | 1.240528813559322   | 1.240677966101695     | 2.5762711864406778  |
| 2.450847457627119                                                                                              | 1.0915254237288134  | 2.3220338983050848  | 1.047457627118644     | 2.1932203389830507  |
| 0.9898305084745763                                                                                             | 2.064406779661017   | 0.9254237288135593  | 1.9627118644067796    | 0.9084745762711864  |
| 1.847457627118644                                                                                              | 0.9288135593220339  | 1.7322033898305085  | 0.9423728813559322    | 1.6372881355932203  |
| 1.488135593220339                                                                                              | 1.0372881355932204  | 1.3864406779661016  | 1.0745762711864406    | 1.2813559322033898  |
| 1.0610169491525423                                                                                             | 1.152542372881356   | 1.0508474576271187  | 1.006779661016949     | 1.0677966101694916  |
| 0.8338983050847457                                                                                             | 1.0983050847457627  | 0.6711864406779661  | 1.1288135593220339    | 0.5423728813559322  |
| 1.1796610169491526                                                                                             | 0.3864406779661017  | 1.2338983050847459  | 0.27796610169491526   | 1.3423728813559321  |
| 0.19322033898305085                                                                                            | 1.4542372881355932  | 0.14576271186440679 | 1.5796610169491525    | 0.13220338983050847 |
| 1.7050847457627119                                                                                             | 0.15932203389830507 | 1.8711864406779661  | 0.2 2.016949152542373 | 0.16610169491525423 |
| 2.1932203389830507                                                                                             | 0.15593220338983052 | 2.335593220338983   | 0.1864406779661017    | 2.461016949152542   |
| 0.30847457627118646                                                                                            | 2.522033898305085   | 0.43728813559322033 | 2.545762711864407     | 0.5525423728813559  |
| 2.5796610169491525                                                                                             | 0.6677966101694915  | 2.610169491525424   | 0.7593220338983051    | 2.623728813559322   |
| 0.9796610169491525                                                                                             | 2.610169491525424   | 1.0745762711864406  | 2.5830508474576273    | 1.2576271186440677  |
| 2.606779661016949                                                                                              | 1.4338983050847458  | 2.6338983050847458  | 1.5694915254237287    | 2.6847457627118643  |
| 1.7423728813559323 2.711864406779661 1.911864406779661 2.694915254237288 2.0203389830508476 2.613559322033898  |                     |                     |                       |                     |
| 2.142372881355932 2.5627118644067797 2.288135593220339 2.48135593220339 2.4033898305084747 2.389830508474576   |                     |                     |                       |                     |
| 2.5152542372881355 2.328813559322034 2.606779661016949 1.240677966101695 2.5762711864406778                    |                     |                     |                       |                     |
| 44                                                                                                             | 1.7910945084836225  | 1.389552881043895   | 1.2905331758497676    | 2.520255887916038   |
| 2.4189051149435437                                                                                             | 1.1824256846791066  | 2.3344461374664647  | 1.1148585026974434    | 2.2466088008903022  |
| 1.0945883481029444                                                                                             | 2.1486363870168907  | 1.0371562434185306  | 2.0607990504407283    | 0.9763457796350337  |
| 1.949313200170984                                                                                              | 0.9797241387341168  | 1.8209355544058239  | 1.003372652427699     | 1.7432332951269112  |
| 1.0439129616166969                                                                                             | 1.5844504174700027  | 1.0810749117066116  | 1.4695862081011752    | 1.1081017844992769  |
| 1.3310734850387655                                                                                             | 1.0945883481029444  | 1.172290607381857   | 1.0776965526075284    | 1.0135077297249484  |

|                     |                     |                     |                     |                     |
|---------------------|---------------------|---------------------|---------------------|---------------------|
| 1.0709398344093621  | 0.8445897747707903  | 1.0979667072020274  | 0.6587800243212165  | 1.131750298192859   |
| 0.5304023785560563  | 1.1858040437781896  | 0.39864637369181305 | 1.317560048642433   | 0.314187396214734   |
| 1.4797212853984247  | 0.2432418551339876  | 1.6216123675599174  | 0.21621498234132233 | 1.7803952452168261  |
| 0.22972841873765498 | 1.9932318684590653  | 0.21283662324223918 | 2.2060684917013043  | 0.24999857333215394 |
| 2.3580946511600467  | 0.35134934630464876 | 2.432418551339876   | 0.5033755057633911  | 2.4864722969252067  |
| 0.6689151016184659  | 2.5236342470151216  | 0.8513464929689567  | 2.516877528816955   | 1.0067510115267821  |
| 2.5033640924206226  | 1.1824256846791066  | 2.510120810618789   | 1.3344518441378488  | 2.5472827607087036  |
| 1.4830996444975078  | 2.5912014289967846  | 1.631747444857167   | 2.6317417381857826  | 1.7635034497214102  |
| 2.6486335336811986  | 1.8817460181893209  | 2.621606660888533   | 1.9864751502608988  | 2.560796197105036   |
| 2.0945826414315603  | 2.5270126061142046  | 2.1790416189086392  | 2.456067065033458   | 2.304040905574716   |
| 2.3986349603490447  | 2.3986349603490447  | 2.3614730102591297  | 2.48985065602429    | 2.3344461374664647  |
| 1.2905331758497676  | 2.520255887916038   |                     |                     |                     |
| 44                  | 1.9167686844460394  | 1.3448863908957756  | 1.403317267860458   | 2.57274832441084    |
| 2.4507207359012346  | 1.2440034717506958  | 2.31174487120974    | 1.1863793327322714  | 2.176158661754623   |
| 2.0507414180086405  | 1.0745207099318     | 1.9592207266264365  | 1.0507931232771546  | 1.8812586561897444  |
| 1.813465551462186   | 1.0982482965864453  | 1.694827618188959   | 1.1355345041866025  | 1.5626310639702201  |
| 1.1694310565503816  | 1.4134862335695917  | 1.1863793327322714  | 1.2643414031689633  | 1.1762103670231374  |
| 1.1219758832410909  | 1.15587243560487    | 0.949103466185817   | 1.1592620908412479  | 0.7558931177122757  |
| 0.616917253020781   | 1.2507827822234516  | 0.43048621501999557 | 1.3117965764782542  | 0.2847310398557451  |
| 1.447382785933371   | 0.18304138276440757 | 1.5761896849157317  | 0.15592414087338421 | 1.7422827914982497  |
| 0.1728724170552738  | 1.9354931399717912  | 0.19660000370991923 | 2.1219241779725766  | 0.16270345134614006 |
| 2.3185241816824957  | 0.16270345134614006 | 2.4913965987377695  | 0.24066552178283218 | 2.606644876774619   |
| 0.42370690454723975 | 2.633762118665642   | 0.5626827692387344  | 2.6846069472113108  | 0.783010359603299   |
| 2.7015552233932008  | 0.9694413976040845  | 2.6913862576840666  | 1.1829896774958932  | 2.698165568156823   |
| 1.3253551974237658  | 2.7185034995750903  | 1.4609414068788826  | 2.765958672884381   | 1.6270345134614006  |
| 1.7422827914982497  | 2.810024190957294   | 1.8643103800078549  | 2.7862966043026485  | 1.9863379685174598  |
| 2.7049448786295787  | 2.104975901790687   | 2.677827636738555   | 2.2100552141184027  | 2.6608793605566654  |
| 2.5896966005927293  | 2.3761483207009206  | 2.535462116810683   | 2.4608897016103684  | 2.4880069435013916  |
| 2.5558000482289502  | 1.403317267860458   | 2.57274832441084    |                     |                     |
| 43                  | 1.826290253577871   | 1.294323694758939   | 1.3243167668405993  | 2.5506611198077866  |
| 2.4628237832316247  | 1.2195876347690213  | 2.3614730102591297  | 1.1418853754901086  | 2.2297170053948867  |
| 1.0810749117066116  | 2.0844475641343108  | 1.0067510115267821  | 2.006745304855398   | 0.9797241387341168  |
| 1.9155296091801526  | 0.9966159342295327  | 1.7837736043159091  | 1.0303995252203642  | 1.6486392403525827  |
| 1.0641831162111959  | 1.50674815819109    | 1.0912099890038611  | 1.3952623079213455  | 1.1148585026974434  |
| 1.2263443529671876  | 1.0844532708056949  | 1.0709398344093621  | 1.0776965526075284  | 0.858103211167123   |
| 1.0979667072020274  | 0.7162121290056302  | 1.1655338891836906  | 0.5304023785560563  | 1.2263443529671876  |
| 0.33783590990831613 | 1.320938407741516   | 0.209458264143156   | 1.4391809762094268  | 0.14526944126057595 |
| 1.5979638538663352  | 0.11148585026974432 | 1.7297198587305787  | 0.1216209275669938  | 1.8412057090003229  |
| 0.14189108216149277 | 1.9729617138645663  | 0.11824256846791065 | 2.1520147461159738  | 0.12499928666607697 |
| 2.3378244965655477  | 0.18918810954865703 | 2.472958860528874   | 0.3040523189174845  | 2.540526042510537   |
| 0.4527001192771436  | 2.601336506294034   | 0.6655367425193828  | 2.635120097284866   | 0.8310763383744577  |
| 1.0439129616166969  | 2.6114715835912836  | 1.2128309165708548  | 2.635120097284866   | 1.4121541034167615  |
| 2.6959305610683626  | 1.6249907266590007  | 2.743227588455527   | 1.7668818088204934  | 2.763497743050026   |
| 1.9189079682792356  | 2.7094439974646956  | 2.0135020230535643  | 2.635120097284866   | 2.1385013097196413  |
| 2.560796197105036   | 2.283770750980217   | 2.496607374222456   | 2.4053916785472107  | 2.4391752695380426  |
| 2.5236342470151216  |                     |                     |                     |                     |
| 2.3344461374664647  | 2.621606660888533   | 1.3243167668405993  | 2.5506611198077866  |                     |
| 48                  | 1.8015988826886384  | 1.3242999402571758  | 1.1952590949779505  | 2.6161023008390636  |
| 2.4847921467428944  | 1.0336465976288192  | 2.360215846702939   | 0.9865096192353225  | 2.2794095980283733  |
| 0.9158041516450776  | 2.148099443932204   | 0.8349979029705119  | 2.0403577790327834  | 0.8114294137737637  |
| 1.942716895217683   | 0.831630975942405   | 1.8248744492339415  | 0.8585663921672603  | 1.6699958059410238  |
| 0.90233644353265    |                     |                     |                     |                     |
| 1.4915486734513579  | 0.9461064948980398  | 1.3400369571865474  | 0.9393726408418259  | 1.1649567517249884  |
| 0.9225380057012914  | 0.9865096192353225  | 0.9124372246169707  | 0.8215301948580843  | 0.9393726408418259  |
| 0.7070546759024496  | 0.9797757651791088  | 0.555542959637639   | 1.003344254375857   | 0.40739817040093523 |

|                     |                     |                      |                      |                     |
|---------------------|---------------------|----------------------|----------------------|---------------------|
| 1.0605820138536743  | 0.2727210892766591  | 1.148122116584454    | 0.15824557032102443  | 1.2996338328492645  |
| 0.08754010273077947 | 1.4679801842546096  | 0.030302343252962126 | 1.6228588275475273   | 0.04377005136538974 |
| 1.797939033009086   | 0.07407239461835187 | 1.9999546546955003   | 0.037036197309175935 | 2.1750348601570595  |
| 0.07407239461835187 | 2.3736835548153667  | 0.18181405951777277  | 2.4881590737710013   | 0.3400596298387972  |
| 2.525195271080177   | 0.49493827313171473 | 2.575699176501781    | 0.6733854056213806   | 2.6295700089514913  |
| 0.8484656110829395  | 2.6228361548952774  | 0.9999773273477501   | 2.592533811642315    | 1.1716906057812022  |
| 2.606001519754743   | 1.323202322046013   | 2.632936935979598    | 1.4646132572265027   | 2.659872352204453   |
| 1.5790887761821375  | 2.7002754765417363  | 1.7238666383907344   | 2.730577819794698    | 1.8248744492339415  |
| 2.740678600879019   | 1.9225153330490417  | 2.7272108927665912   | 2.020156216864142    | 2.66323927923256    |
| 2.114430173651135   | 2.2120710574662352  | 2.579066103529888    | 2.313078868309442    | 2.51172756296775    |
| 2.393885116984008   | 2.451122876461825   | 2.4814252197147875   | 2.4006189710402217   | 2.56559839541746    |
| 2.3467481385905113  | 2.6497715711201324  | 1.1952590949779505   | 2.6161023008390636   |                     |
| 47                  | 1.864893525422625   | 1.3241531627839689   | 1.2943991050491228   | 2.5922225463549893  |
| 1.2087906986305301  | 2.441551751058266   | 1.1437283097523996   | 2.3285486545857235   | 1.0957876021579875  |
| 2.215545558113181   | 1.0375738857933445  | 2.1162398066676134   | 0.9793601694287014   | 2.003236710195071   |
| 0.9622384881449828  | 1.9313256488034531  | 0.9793601694287014   | 1.8525659148983478   | 1.0238765407663697  |
| 1.719016800885343   | 1.0649685758472942  | 1.5751946781021071   | 1.1060606109282187   | 1.4074022015216652  |
| 1.11633361969845    | 1.256731406224942   | 1.1094849471849624   | 1.11633361969845     | 1.112909283441706   |
| 0.9759358331719576  | 1.1334553009821684  | 0.8218407016184907   | 1.1676986635496054   | 0.6780185788352548  |
| 1.2087906986305301  | 0.5239234472817877  | 1.2738530875086604   | 0.3664039794715771   | 1.3731588389542282  |
| 0.2807955730529843  | 1.5238296342509514  | 0.2225818566883412   | 1.6813491020611622   | 0.22943052920182863 |
| 1.8080495435606794  | 0.2397035379720598  | 1.9039309587495035   | 0.2534008829990346   | 2.0648747628164577  |
| 0.23285486545857237 | 2.2189698943699248  | 0.23627920171531608  | 2.3422459996126985   | 0.29106858182321543 |
| 2.44497608731501    | 0.37667698824180823 | 2.513462812449884    | 0.49995309348458183  | 2.53743316624709    |
| 0.5958345086734057  | 2.5751008650712706  | 0.7567783127403601   | 2.6230415726656826   | 0.9040247717803397  |
| 2.6230415726656826  | 1.0512712308203194  | 2.6127685638954516   | 1.1882446810900678   | 2.5887982100982456  |
| 1.3320668038733037  | 2.6059198913819643  | 1.4964349441970017   | 2.6367389176926577   | 1.6197110494397753  |
| 2.6744066165168383  | 1.7498358271960364  | 2.7052256428275316   | 1.862838923668579    | 2.6983769703140443  |
| 2.0306314002490207  | 2.6812552890303256  | 2.1128154704108697   | 2.6161929001521953   | 2.2121212218564374  |
| 2.5751008650712706  | 2.321699982072236   | 2.486068122395934    | 2.431278742288035    | 2.5237358212201153  |
| 2.355943344639673   | 2.6230415726656826  | 1.2943991050491228   | 2.5922225463549893   |                     |
| 46                  | 1.666915206290393   | 1.342452932188943    | 1.177467544967815    | 2.5631250036835627  |
| 1.1160344556651465  | 2.4539106227010405  | 1.0443625181453664   | 2.334457393501407    | 0.9692776312198825  |
| 2.2423077595474044  | 0.941974035974252   | 2.1467451761876974   | 0.8771279972658795   | 2.0784861880736214  |
| 0.8225208067746186  | 1.9624459082796917  | 0.8395855538031376   | 1.866883324919985    | 0.8498244020202491  |
| 1.7576689439374629  | 0.8907797948886949  | 1.6006732712750877   | 0.9351481371628444   | 1.4470905480184162  |
| 0.9487999347856596  | 1.3139855211959675  | 0.9351481371628444   | 1.1808804943735187   | 0.9146704407286215  |
| 1.0546013663624778  | 0.9146704407286215  | 0.9010186431058063   | 0.9556258335970672   | 0.7542618186605423  |
| 0.9999941758712168  | 0.6245697412437975  | 1.0204718723054396   | 0.5051165120441641   | 1.0819049616081082  |
| 0.37201148522171545 | 1.2081840896191494  | 0.2730359524563049   | 1.3447020658473017   | 0.22184171137074776 |
| 1.467568244452639   | 0.19112516671941346 | 1.6552804617663486   | 0.22525466077645157  | 1.812276134428724   |
| 0.18429926790800583 | 1.9999883517424335  | 0.2047769643422287   | 2.1467451761876974   | 0.2696230030506011  |
| 2.2593725065759234  | 0.37542443462741926 | 2.3242185452842956   | 0.5187683096669794   | 2.378825735775557   |
| 0.6450474376780204  | 2.412955229832595   | 0.7849783633118766   | 2.4504976732953367   | 1.0034071252769206  |
| 2.4334329262668177  | 1.1262733038822579  | 2.430019976861114    | 1.3071596223845598   | 2.464149470918152   |
| 1.4402646492070086  | 2.494866015569486   | 1.5836085242465685   | 2.532408459032228    | 1.7337782980975363  |
| 2.5870156495234893  | 1.8737092237313926  | 2.5631250036835627   | 1.9795106553082107   | 2.5016919143808938  |
| 2.071660289262214   | 2.4573235721067443  | 2.1774617208390317   | 2.3890645839926683   | 2.286676101821554   |
| 2.3071537982557766  | 2.3890645839926683  | 2.262785455981627    | 2.4880401167580786   | 2.2252430125188853  |
| 2.5528861554664513  | 1.177467544967815   | 2.5631250036835627   |                      |                     |
| 49                  | 1.8702140660901891  | 1.2930279169749952   | 1.3276723964288837   | 2.4898080309620543  |
| 1.2769978774812165  | 2.412107101908964   | 1.192540345901771    | 2.3073797627504518   | 1.1452441282172814  |
| 2.1992741223287617  | 1.094569609269614   | 2.0877901806438937   | 1.0134903789533463   | 1.9796845402222032  |
| 0.9999771739006351  | 1.8850921048532243  |                      |                      |                     |

|                     |                     |                     |                     |                     |
|---------------------|---------------------|---------------------|---------------------|---------------------|
| 1.020246981479702   | 1.7769864644315339  | 1.0540299941114801  | 1.6722591252730215  | 1.0844347054800807  |
| 1.5607751835881534  | 1.1080828143223254  | 1.4391563381137518  | 1.13173092316457    | 1.2938893837971055  |
| 1.1283526219013922  | 1.1486224294804592  | 1.1114611155855032  | 0.9932205713742794  | 1.1283526219013922  |
| 0.8479536170576332  | 1.1587573332699928  | 0.7398479766359428  | 1.192540345901771   | 0.6249857336878969  |
| 1.2161884547440156  | 0.4932319844239619  | 1.2736195762180387  | 0.35472163263367124 | 1.3378073002184172  |
| 0.26012919726469225 | 1.469561049482352   | 0.19594147326431363 | 1.624962907588532   | 0.18580656947478016 |
| 1.7533383555892892  | 0.18918487073795798 | 1.8749572010636908  | 0.21283297958020272 | 2.023602456643515   |
| 0.18580656947478016 | 2.189139218539228   | 0.18918487073795798 | 2.327649570329519   | 0.24323769094880313 |
| 2.4289986082248536  | 0.32431692126507083 | 2.5066995372779433  | 0.4628272730553615  | 2.5472391524360773  |
| 0.6114725286351856  | 2.5844004663310334  | 0.7432262778991207  | 2.6215617802259894  | 0.8986281360053004  |
| 2.6215617802259894  | 1.0303818852692355  | 2.6012919726469224  | 1.1621356345331706  | 2.5979136713837443  |
| 1.2533497686389716  | 2.6181834789628113  | 1.418886530534685   | 2.662101395384123   | 1.567531786114509   |
| 2.678992901700012   | 1.6688808240098436  | 2.716154215594968   | 1.7803647656947117  | 2.7330457219108575  |
| 1.9121185149586468  | 2.6958844080159015  | 2.003332649064448   | 2.6350749852787003  | 2.0945467831702493  |
| 2.6046702739101     | 2.5371042486465436  | 2.287109955171385   | 2.4627816208566315  | 2.3918372943298976  |
| 2.4087288006457865  | 2.476294825909343   | 2.378324089277186   | 2.533725947383366   | 1.3276723964288837  |
| 2.4898080309620543  | 47                  | 1.7776925579375598  | 1.1651588913236925  | 1.2939115349488508  |
| 2.4189051149435437  | 2.3141759828719657  | 1.1858040437781896  | 2.2364737235930527  | 1.1081017844992769  |
| 2.1418796688187243  | 1.0776965526075284  | 2.0405288958462293  | 1.003372652427699   | 1.929043045576485   |
| 0.9594539841396178  | 1.7905303225140756  | 0.9932375751304494  | 1.6418825221544164  | 1.0303995252203642  |
| 1.5101265172901732  | 1.0641831162111959  | 1.402019026119512   | 1.0945883481029444  | 1.2635063030571023  |
| 1.0945883481029444  | 1.1249935799946926  | 1.0844532708056949  | 1.003372652427699   | 1.0709398344093621  |
| 0.8648599293652893  | 1.0878316299047779  | 0.7162121290056302  | 1.131750298192859   | 0.5776994059432206  |
| 1.1655338891836906  | 0.4729702738716426  | 1.2026958392736053  | 0.3412142690073993  | 1.280398098552518   |
| 0.2263500596385718  | 1.3783705124259298  | 0.1655395958550749  | 1.4695862081011752  | 0.1317560048642433  |
| 1.5945854947672522  | 0.1385127230624096  | 1.6993146268388302  | 0.15202615945874226 | 1.7939086816131586  |
| 0.16216123675599176 | 1.8749892999911546  | 0.14189108216149277 | 1.9594482774682336  | 0.1317560048642433  |
| 2.1080960778278928  | 0.1317560048642433  | 2.263500596385718   | 0.18918810954865703 | 2.388499883051795   |
| 0.3074306780165677  | 2.4594454241325416  | 0.4898620693670584  | 2.4999857333215396  | 0.648644947023967   |
| 2.533769324312371   | 0.8040494655817924  | 2.520255887916038   | 0.9695890614368673  | 2.516877528816955   |
| 1.0878316299047779  | 2.5270126061142046  | 1.2229659938681043  | 2.557417838005953   | 1.3918839488222625  |
| 2.61822830178945    | 2.6520118927802816  | 1.7094497041360797  | 2.638498456383949   | 1.8074221180094914  |
| 2.6080932244922006  | 1.9121512500810693  | 2.5506611198077866  | 1.9864751502608988  | 2.496607374222456   |
| 2.1317445915214748  | 2.429040192240793   | 2.2330953644939697  | 2.364851369358213   | 2.344581214763714   |
| 2.3209327010701317  | 1.2939115349488508  | 2.4189051149435437  | 2.530187096414725   | 1.1040206296027115  |
| 2.087236570251935   | 2.4093824074612367  | 0.9765045690406963  | 2.224819688226741   | 0.9093908529554251  |
| 0.8422771368701538  | 0.8456328226744174  | 1.9697875671027103  | 0.8120759646317818  | 1.8523385639534857  |
| 1.4932801828972846  | 1.7617350472383695  | 0.8926124239341072  | 1.6308633008720907  | 0.9261692819767429  |
| 0.9395920251937971  | 0.9429477109980606  | 1.291939034641471   | 0.9362363393895335  | 1.1140876870155023  |
| 0.5570438435077512  | 0.9093908529554251  | 0.9798602548449599  | 0.7516736201550377  | 1.0134171128875955  |
| 0.191274090843023   | 1.100664943798448   | 0.359058381056201   | 1.244959433381781   | 0.23825369210271283 |
| 1.429522152616277   | 1.57381664219961    | 0.19462977664728653 | 1.6845542737403076  | 0.2147638914728679  |
| 1.8858954219961213  | 0.18456271923449585 | 2.0905922560561985  | 0.23154232049418572 | 2.26173223207364    |
| 0.36241406686046457 | 2.345624377180229   | 0.5603995293120146  | 2.3825369210271283  | 0.711405390503875   |
| 2.432872208091082   | 2.439583579699609   | 1.0805308289728666  | 2.4295165222868182  | 1.2986504062499982  |
| 2.4630733803294538  | 1.4798574396802304  | 2.5268314106104617  | 1.6677758447189899  | 2.563743954457361   |
| 1.8187817059108502  | 1.9697875671027103  | 2.489918866763562   | 2.087236570251935   | 2.4429392655038726  |
| 2.208041259205423   | 2.30871183333333    | 2.30871183333333    | 2.3993153500484463  | 2.244953803052322   |
| 2.5268314106104617  | 2.530187096414725   | 1.778772082474612   | 1.276557230813143   | 1.0982041341075683  |
| 2.5997610211743982  | 2.454011707079875   | 0.9321177064184608  | 2.3184309497826443  | 0.8880539602968609  |
| 2.1964082682151367  | 0.8338216573779687  | 2.1015017381070753  | 0.7490836840671994  | 1.94558386721526    |
| 0.7660312787293533  |                     |                     |                     |                     |

|                     |                     |                     |                     |                    |
|---------------------|---------------------|---------------------|---------------------|--------------------|
| 1.7930555152558756  | 0.8372111763103993  | 1.5930738982424604  | 0.9083910738914455  | 1.4269874705533527 |
| 0.9490653010806147  | 1.264290561796676   | 0.9558443389454762  | 1.10498317197243    | 0.9456757821481839 |
| 0.8982225170941531  | 0.9863500093373531  | 0.7287465704726148  | 1.0405823122562454  | 0.5457125481213534 |
| 1.1015936530399992  | 0.362678525770092   | 1.1829421074183375  | 0.24065584420258443 | 1.335470459377722  |
| 0.12880171943236912 | 1.4269874705533527  | 0.10507508690535376 | 1.5591787089181526  | 0.1220226815675076 |
| 1.6676433147559373  | 0.1525283519593845  | 1.7998345531207371  | 0.1728654655539691  | 1.9659209808098448 |
| 0.16608642768910756 | 2.138786446363814   | 0.1525283519593845  | 2.338768063377229   | 0.2338768063377229 |
| 2.470959301742029   | 2.5082440099987675  | 0.5050383209321843  | 2.5319706425257826  | 0.6711247486212918 |
| 2.559086793985229   | 0.8304321384455379  | 2.5828134265122444  | 0.9829604904049224  | 2.5760343886473827 |
| 1.0880355773102761  | 2.5489182371879364  | 1.19311066421563    | 2.542139199323075   | 1.450714103080368  |
| 2.5692553507825213  | 2.6065400590392596  | 1.7625498448639987  | 2.643824767295998   | 1.9218572346882448 |
| 2.640435248363567   | 2.5794239075798133  | 2.179460673552983   | 2.4946859342690444  | 2.25403009006646   |
| 2.467569782809598   | 2.4133374798907057  | 2.4336745934852906  | 2.3082623929853523  | 2.5218020857284906 |
| 2.2167453818097216  | 2.6675513998230134  | 1.0982041341075683  | 2.5997610211743982  |                    |
| 43                  | 1.718439988991761   | 1.3002040887773723  | 1.0973092579941846  | 2.583878069282942  |
| 1.0301955419089133  | 2.4462949513081362  | 0.9295249677810065  | 2.3120675191375937  | 0.8859010523255801 |
| 2.201329887596896   | 0.8322100794573631  | 2.0973036276647257  | 0.7583849917635648  | 1.9832103103197647 |
| 0.7281838195251927  | 1.872472678779067   | 0.7617406775678284  | 1.751667989825579   | 0.8154316504360454 |
| 1.597306442829455   | 1.4060323519864322  | 0.9194579103682158  | 1.2181139469476727  | 0.8993237955426344 |
| 1.0402625993217038  | 0.8758339949127895  | 0.8389214510658902  | 0.9228135961724793  | 0.6375803028100766 |
| 0.9731488832364327  | 0.4228164113372087  | 1.0503296567344946  | 0.2516764353197671  | 1.2114025753391455 |
| 0.11073763154069752 | 1.3590527507267423  | 0.06711371608527122 | 1.5603938989825559  | 0.0771807734980619 |
| 1.6979770169573618  | 0.11073763154069752 | 1.8825397361918577  | 0.0771807734980619  | 2.057035398013563  |
| 0.07382508769379835 | 2.2147526308139502  | 0.15100586119186024 | 2.2952890901162757  | 0.191274090843023  |
| 2.3959596642441827  | 0.31543446560077476 | 2.4462949513081362  | 0.47650738420542565 | 2.469784751937981  |
| 0.6308689312015495  | 2.5033416099806165  | 0.825498707848836   | 2.4932745525678257  | 1.023484170300386  |
| 2.476496123546508   | 2.4966302383720893  | 1.4127437235949591  | 2.5771666976744148  | 1.6644201589147263 |
| 2.6174349273255775  | 1.812070334302323   | 2.630857670542632   | 1.9630761954941833  | 2.5771666976744148 |
| 2.06374676962209    | 2.140927543120152   | 2.4496506371123994  | 2.2583765462693766  | 2.3825369210271283 |
| 2.369114177810074   | 2.45971769452519    | 2.26173223207364    | 2.5503212112403064  | 2.2214640024224774 |
| 2.6040121841085235  | 2.583878069282942   |                     |                     |                    |
| 1.0973092579941846  | 47                  | 1.7640272563749153  | 1.341060705652492   | 1.1423466283596204 |
| 2.610109506934444   | 2.5016374235293766  | 1.0169257819225108  | 2.3796063296986754  | 0.9559102350071602 |
| 2.321980535389733   | 2.220287957197482   | 0.8982844406982179  | 2.1355441420372725  | 0.7999816151123752 |
| 2.027072058632205   | 0.7830328520803334  | 1.854194675705378   | 0.8474381516020923  | 1.6813172927785511 |
| 0.9016741933046263  | 1.5186091676709494  | 0.9626897402199769  | 1.3389522795313058  | 0.9592999876135685 |
| 1.1491261335724372  | 0.9491307297943434  | 0.9864180084648355  | 0.9660794928263853  | 0.8203201307508254 |
| 1.0338745449545526  | 0.62371447957914    | 1.0711618236250446  | 0.46100635447153826 | 1.1084491022955367 |
| 0.3288060028216118  | 1.1694646492108873  | 0.24067243505499422 | 1.2779367326159552  | 0.155928619894785  |
| 1.4575936207555988  | 0.11864134122429293 | 1.5931837250119336  | 0.14914911468196826 | 1.7389430870874936 |
| 0.19660565117168544 | 1.918599975227137   | 0.15253886728837662 | 2.091477358153964   | 0.1423696094691515 |
| 2.220287957197482   | 0.16948763032041847 | 2.3423190510281833  | 0.24406218766140259 | 2.4270628661883924 |
| 0.34236501324724533 | 2.4609603922524763  | 0.49490388053562195 | 2.481298907890926   | 0.6982890369201241 |
| 2.5118066813486015  | 0.881335677666176   | 2.5185861865614183  | 1.064382318412228   | 2.5016374235293766 |
| 1.2101416804877878  | 2.5016374235293766  | 1.3321727743184892  | 2.5185861865614183  | 1.5186091676709494 |
| 2.566042723051136   | 1.7152148188426348  | 2.606719754328036   | 1.8202971496412943  | 2.6270582699664864 |
| 1.9457179960784041  | 2.603330001721628   | 2.05757983208988    | 2.552483712625502   | 2.1524929050693147 |
| 2.481298907890926   | 2.467739897465293   | 2.284693256719241   | 2.433842371401209   | 2.3829960823050835 |
| 2.3457088036345914  | 2.311811277570508   | 2.559263217838319   | 2.227067462410299   | 2.6575660434241617 |
| 1.1423466283596204  | 2.610109506934444   |                     |                     |                    |
| 1.1672083030738314  | 42                  | 1.7900606870240483  | 1.2924613578188886  | 1.235466098575225  |
| 2.5357771028767737  | 2.4095001811991956  | 1.0682344995968105  | 2.25592014132106    | 0.9999767040954168 |
| 2.1057529912179938  | 0.9078286801685355  | 1.976063179765346   | 0.901002900618396   | 1.8224831398872103 |
| 0.9624349165696504  | 1.6245355329331688  | 1.0068024836455562  | 1.4777812726051724  | 1.0375184916211835 |
| 1.2832465554262005  |                     |                     |                     |                    |

|                     |                     |                     |                     |                     |
|---------------------|---------------------|---------------------|---------------------|---------------------|
| 1.0341056018461137  | 1.1637954132987616  | 1.0136282631956957  | 1.030692712071044   | 1.0272798222959743  |
| 0.856635335424902   | 1.064821609821741   | 0.7235326323147726  | 1.085298948472159   | 0.5972557106371944  |
| 1.1194278462228557  | 0.4470885605341284  | 1.1842727519491798  | 0.31398585930641076 | 1.3446785713774547  |
| 0.20818627627925063 | 1.5221488396810783  | 0.19794760695404157 | 1.7337480057353984  | 0.19794760695404157 |
| 1.9043924944888826  | 0.18770893762883253 | 2.0852756525675757  | 0.19794760695404157 | 2.242268582220781   |
| 0.290095630880923   | 2.3310037163725927  | 0.4061338832332922  | 2.3651326141232896  | 0.5563010333363582  |
| 2.4095001811991956  | 0.7371841914150513  | 2.4538677482751017  | 0.8702868926427689  | 2.4538677482751017  |
| 0.9931509245452775  | 2.4333904096246832  | 1.085298948472159   | 2.4299775198496136  | 1.2149887599248068  |
| 2.4504548585000316  | 1.3685687998029425  | 2.4982353153510073  | 1.546039068106566   | 2.546015772201983   |
| 1.6723159897841442  | 2.5801446699526798  | 1.795180021686653   | 2.5835575597277494  | 1.911218274039022   |
| 2.552841551752122   |                     |                     |                     |                     |
| 1.9999534081908337  | 2.481170866475659   | 2.1194045503182726  | 2.4538677482751017  | 2.2115525742451543  |
| 2.3583068345731504  | 2.341242385697802   | 2.3139392674972443  | 2.4368032993997533  | 2.2593330310961295  |
| 2.5289513233266345  | 1.235466098575225   | 2.5357771028767737  |                     |                     |
| 44                  | 1.7545251980727794  | 1.3140310726908222  | 1.1835023287801578  | 2.6322724209075923  |
| 1.1120840848020448  |                     |                     |                     |                     |
| 2.499638539233954   | 1.0134588907370317  | 2.326194232429965   | 0.9386397779980562  | 2.1799568757128767  |
| 0.8706224027808057  | 2.0847325504087264  | 0.8230102401287304  | 1.9963099626263006  | 0.8264111088895929  |
| 1.8466717371483496  | 0.8740232715416683  | 1.7140378554747113  | 0.9148336966720185  | 1.5780031050402104  |
| 0.9522432530415063  | 1.438567485844847   | 0.9658467280849563  | 1.2787266540843083  | 0.9522432530415063  |
| 1.0950797409977322  | 0.9454415155197812  | 1.0270623657804818  | 0.9522432530415063  | 0.8298119776504554  |
| 0.9964545469327191  | 0.690376358455092   | 1.0304632345413443  | 0.5509407392597286  | 1.067872790910832   |
| 0.39790164502091513 | 1.1562953786932575  | 0.2550651570646892  | 1.2923301291277585  | 0.1360347504345009  |
| 1.4691753046926097  | 0.0918234565432881  | 1.6154126614096982  | 0.0918234565432881  | 1.8126630495397245  |
| 0.12243127539105081 | 2.033719518995788   | 0.10882780034760071 | 2.193560350756327   | 0.16324170052140108 |
| 2.3091898886256526  | 0.2550651570646892  | 2.411215951451528   | 0.4013025137817776  | 2.475832457907916   |
| 0.5883502956292164  | 2.5472507018860293  | 0.7413893898680298  | 2.5880611270163794  | 0.8876267465851183  |
| 2.5676559144512043  | 1.0984806097585946  | 2.5506515706468917  | 1.2719249165625834  | 2.574457651972929   |
| 1.4317657483231219  | 2.6118672083424173  | 1.5814039738010728  | 2.6526776334727673  | 1.7344430680398863  |
| 2.68328545232053    | 1.850072605909212   | 2.6968889273639802  | 1.979305618821988   | 2.6900871898422554  |
| 2.043922125278376   |                     |                     |                     |                     |
| 2.5914619957772422  | 2.2173664320823647  | 2.5370480956034416  | 2.3534011825168655  | 2.479233326668779   |
| 2.435022032777566   | 2.4044142139298033  | 2.5370480956034416  | 2.326194232429965   | 2.6458758959510424  |
| 1.1835023287801578  | 2.6322724209075923  |                     |                     |                     |
| 39                  | 1.7485545800889497  | 1.1875303023077768  | 1.2449384053784351  | 2.483165552506852   |
| 1.154336419003185   |                     |                     |                     |                     |
| 2.359007274881509   | 1.0301781413778426  | 2.204648335131083   | 0.9630655588776573  | 2.060356282755685   |
| 0.8959529763774722  |                     |                     |                     |                     |
| 1.9361980051303425  | 0.8791748307524259  | 1.7583496615048517  | 0.9227980093775462  | 1.6039907217544258  |
| 0.9630655588776573  | 1.463054298504037   | 1.0066887375027778  | 1.3019841005035926  | 1.023466883127824   |
| 1.1342026442531297  | 1.0066887375027778  | 0.9798437045027036  | 1.0133999957527962  | 0.7986397317522037  |
| 1.0536675452529074  | 0.6140801298766944  | 1.1040019821280462  | 0.3422741707509444  | 1.1845370811282685  |
| 0.23153840962563887 | 1.281850325753537   | 0.1644258271254537  | 1.3825191995038146  | 0.12751390675035185 |
| 1.5167443645041851  | 0.15435893975042592 | 1.671103304254611   | 0.20133774750055555 | 1.8086840983799906  |
| 0.2214715222506111  | 2.0234443623805833  | 0.16107019800044445 | 2.187870189506037   | 0.12751390675035185 |
| 2.318739725381398   | 0.2046933766255648  | 2.409341711756648   | 0.35569668725098147 | 2.4428980030067406  |
| 0.5469675473765092  | 2.5066549563819165  | 0.7281715201270093  | 2.536855618507      | 0.9060198637525     |
| 2.510010585506926   |                     |                     |                     |                     |
| 1.0972907238780276  | 2.5167218437569443  | 1.3187622461286388  | 2.5603450223820645  | 1.54023376837925    |
| 2.644235750507296   |                     |                     |                     |                     |
| 1.7516384032548333  | 2.6475913796323054  | 1.8825079391301944  | 2.6207463466322314  | 1.9865324420054813  |
| 2.5435668767570183  | 2.097268203130787   | 2.4965880690068887  | 2.2214264807561297  | 2.3556516457564998  |
| 2.385852307881583   | 2.2684052885062593  | 2.486521181631861   | 1.2449384053784351  | 2.483165552506852   |
| 39                  | 1.7949027496235854  | 1.2848504397301646  | 1.2941098998693366  | 2.5986003604328123  |
| 1.2179857881123168  |                     |                     |                     |                     |
| 2.470573445205097   | 1.1280209287631116  | 2.3667678382637063  | 1.0657375645982772  | 2.2525816706281767  |
| 1.0345958825158599  | 2.1556964374828786  | 0.9446310231666548  | 2.0380500829493027  | 0.927330088676423   |
| 1.8927222332313558  | 0.9550115838607939  | 1.7439341966153628  | 1.0311356956178137  | 1.5467035434267205  |
| 1.0657375645982772  | 1.3806145723204954  | 1.07265793839437    | 1.2145256012142704  | 1.0484366301080454  |
| 1.0207551349236745  | 1.0518968170060918  | 0.8235244817350323  | 1.1107199942728798  | 0.6159132678522511  |
| 1.1453218632533433  | 0.439443736051887   | 1.259508030888873   | 0.27681495184370836 | 1.3633136378302637  |



|                     |                     |                     |                     |                     |
|---------------------|---------------------|---------------------|---------------------|---------------------|
| 0.22145196147496668 | 1.512101674446257   | 0.20069084008668855 | 1.650509150368111   | 0.20415102698473492 |
| 1.8235184952704289  | 0.24913345665933753 | 1.9584657842942366  | 0.21107140078082762 | 2.1522362505848323  |
| 0.19377046629059586 | 2.3217854085891036  | 0.22491214837301304 | 2.4359715762246337  | 0.2802751387417547  |
| 2.529396622471885   | 0.42560298845970157 | 2.567458678350395   | 0.5986123333620194  | 2.61936148182109    |
| 0.8062235472448006  | 2.6401226032093685  | 0.9965338266373501  | 2.6089809211269515  | 1.2249061619084094  |
| 2.6228216687191366  | 1.474039618567747   | 2.69548559357811    | 1.7058721407368527  | 2.7577689577429445  |
| 1.9204037284157267  | 2.7266272756605274  | 2.0553510174395346  | 2.6574235376996     | 2.1937584933613885  |
| 2.5743790521464875  | 2.3702280251617527  | 2.4671132583070507  | 2.519016061777746   | 2.373688212059799   |
| 2.626281855617183   | 1.2941098998693366  | 2.5986003604328123  | 32                  | 1.8325375178333774  |
| 1.5547338791128371  | 1.2926123104989153  | 2.6827802670732206  | 1.2229297061593511  | 2.5399309281771143  |
| 1.118405799650005   | 2.369208547545182   | 1.0765962370462665  | 2.205454427347206   | 1.0103977629236804  |
| 2.093962260403903   | 1.0069136327067023  | 1.9336922704229058  | 1.0765962370462665  | 1.7769064106588863  |
| 1.1497629716028088  | 1.5957316393760195  | 1.1985407946405038  | 1.4006203472252399  | 1.2055090550744603  |
| 1.1985407946405038  | 1.2229297061593511  | 1.0313025442255497  | 1.2960964407158937  | 0.8257388614238355  |
| 1.351842524187545   | 0.6306275692730557  | 1.4737870817817822  | 0.5017147512448621  | 1.651477722847671   |
| 0.4424845375562325  | 1.9441446610738404  | 0.4703575792920582  | 2.08699399969947    | 0.45990518864112356 |
| 2.268168771252814   | 0.46338931885810175 | 2.407533979931942   | 0.5365560534146442  | 2.5294785375261797  |
| 0.7769610383861405  | 2.571288100129918   | 1.0731121068292884  | 2.5643198396959614  | 1.404104477442218   |
| 2.5782563605638744  | 1.6898031552344313  | 2.640970704469482   | 1.9162716193380147  | 2.6758120066392643  |
| 2.1427400834415984  | 2.6235500533845912  | 2.2472639899509446  | 2.5399309281771143  | 2.3587561568942474  |
| 2.487668974922441   | 2.5085737562243104  | 2.3901133288470513  | 2.6235500533845912  | 2.3134624640735306  |
| 2.7420104807618504  | 1.2926123104989153  | 2.6827802670732206  | NA                  | NA                  |
| NA                  | NA                  | NA                  | NA                  | NA                  |
| 36                  | 1.8728428768974725  | 1.3135129152864806  | 1.3298530945632818  | 2.5972065658833805  |
| 1.2465202635723711  | 2.440957507775423   | 1.1492986274163088  | 2.274291845793602   | 1.0729101990079741  |
| 2.1284593915595087  | 0.9895773680170635  | 1.9930435411992788  | 0.9965217705996394  | 1.8263778792174576  |
| 1.0555491925515343  | 1.6354068081966207  | 1.1006878093382777  | 1.496518756545103   | 1.138882023542445   |
| 1.3298530945632818  | 1.1597152312901726  | 1.1562430299988846  | 1.1458264261250208  | 0.9965217705996394  |
| 1.1597152312901726  | 0.7986062969962267  | 1.2083260493682038  | 0.6145796285579658  | 1.2916588803591145  |
| 0.4270807588284169  | 1.4027693216803285  | 0.2638872981378836  | 1.5312407694579824  | 0.16319346069053328 |
| 1.6249902043227569  | 0.1319436490689418  | 1.8090168727610179  | 0.1319436490689418  | 1.975682534742839   |
| 0.1562490581079574  | 2.215264423841707   | 0.15277685681666944 | 2.4305409039015595  | 0.22569308393371623 |
| 2.6215119749223965  | 0.4062475510806892  | 2.6979004033307312  | 0.6354128363056935  | 2.7360946175348984  |
| 0.8576337189481217  | 2.7291502149523224  | 1.1145766145034295  | 2.694428202039443   | 1.2916588803591145  |
| 2.7256780136610343  | 1.5312407694579824  | 2.809010844651945   | 1.795128067595866   | 2.812483045943233   |
| 2.0104045476557184  | 2.1562370018898123  | 2.642345182670124   | 2.3159582612890572  | 2.5555401503879254  |
| 2.4340131051928475  | 2.4860961245621667  | 2.520818137475046   | 2.4201243000276955  | 2.6492895852526996  |
| 1.3298530945632818  | 2.5972065658833805  | NA                  | NA                  | NA                  |
| 39                  | 1.993031860059195   | 1.2119778986509275  | 1.4186511503893575  | 2.4566885775035217  |
| 1.3494486552484133  | 2.32174371197868    | 1.262945536322233   | 2.204099470239075   | 1.2006632906953831  |
| 2.0587742304430923  | 1.9411299887034867  | 1.0830190489557778  | 1.8027249984215983  | 1.1141601717692027  |
| 1.6124181367840016  | 1.1764424173960526  | 1.4151910256323104  | 1.2179639144806191  | 1.2491050372940442  |
| 1.231804413508808   | 1.0553380508994001  | 1.2248841639947137  | 0.8615710645047562  | 1.2491050372940442  |
| 0.6643439533530651  | 1.297546783892705   | 0.47403709171546826 | 1.3632891542766021  | 0.26988973104968267 |
| 1.4497922732027826  | 0.1799264873664551  | 1.6089580120269542  | 0.11764424173960526 | 1.730062378523607   |
| 0.10034361795436919 | 1.9826514857880533  | 0.13840499028188855 | 2.1764184721826974  | 0.10034361795436919 |
| 2.32174371197868    | 0.11072399222551084 | 2.460148702260569   | 0.15916573882417182 | 2.512050573616277   |
| 0.2076074854228328  | 2.605473942056552   | 0.32525172716243805 | 2.6642960629263546  | 0.5363193373423181  |
| 2.6815966867115906  | 0.7093255751946788  | 2.702357435253874   | 0.9584545577020782  | 2.685056811468638   |
| 1.1280006707973915  | 2.6919770609827323  | 1.2837062848645162  | 2.7611795561236763  | 1.5016941445584906  |
| 2.8130814274793847  | 1.6920010061960875  | 2.8303820512646207  | 1.8442464955061648  | 2.7992409284511957  |
| 1.9238293649182507  | 2.7161979342820626  | 2.0518539809289975  | 2.6573758134122603  | 2.204099470239075   |
| 2.5743328192431267  | 2.304443088193444   | 2.5328113221585604  | 2.4013265813907663  | 2.463608827017616   |
| 2.477449326045805   | 2.4566885775035217  | 1.4186511503893575  | 2.5173611111111111  | 1.722916666666667   |
| 1.3579375           | 1.1597222222222223  | 2.6805555555555554  | 1.0833333333333333  | 2.5173611111111111  |

|                     |                           |                           |                           |                                       |
|---------------------|---------------------------|---------------------------|---------------------------|---------------------------------------|
| 1.003472222222223   | 2.409722222222223         | 0.944444444444444         | 2.288194444444446         | 0.899305555555555                     |
| 2.177083333333333   | 0.815972222222222         | 2.034722222222223         | 0.829861111111112         | 1.864583333333333                     |
| 0.888888888888888   | 1.670138888888888         | 0.940972222222222         | 1.538194444444444         | 0.979166666666666                     |
| 1.354166666666667   | 0.96875 1.184027777777777 | 0.961805555555555         | 1.0 0.993055555555555     | 0.791666666666666                     |
| 1.055555555555555   | 0.559027777777778         | 1.142361111111112         | 0.347222222222222         | 1.319444444444444                     |
| 0.211805555555555   | 1.489583333333333         | 0.159722222222222         | 1.611111111111112         | 0.163194444444444                     |
| 1.809027777777777   | 0.184027777777778         | 1.996527777777777         | 0.1875 2.194444444444446  | 0.21875 2.3125                        |
| 0.277777777777778   | 2.409722222222223         | 0.336805555555555         | 2.538194444444446         | 0.597222222222222                     |
| 2.565972222222223   | 0.802083333333334         | 2.604166666666665         | 1.03125 2.569444444444446 | 1.333333333333333                     |
| 2.600694444444446   | 1.534722222222223         | 2.659722222222223         | 1.802083333333333         | 2.680555555555554                     |
| 2.041666666666665   | 2.625 2.177083333333335   | 2.53125 2.329861111111111 | 2.454861111111111         | 2.472222222222223                     |
| 2.371527777777777   | 2.555555555555554         | 2.291666666666665         | 2.694444444444446         | 1.159722222222223                     |
| 2.680555555555554   | NA NA                     |                           |                           |                                       |
| 37                  | 1.7759823496757043        | 1.4958243162868454        | 1.2152704519507798        | 2.63192857879626 1.142354224833733    |
| 2.4791517219795907  | 1.0520769912602466        | 2.357624676784513         | 1.013882777056079         | 2.2534586380458745                    |
| 0.9444387512303203  | 2.163181404472388         | 0.9027723357348649        | 2.0138767489470064        | 0.9201333421913047                    |
| 1.8749886972954888  | 0.9791607641431996        | 1.7013786327310916        | 1.0277715822212308        | 1.5520739772057102                    |
| 1.0659657964253981  | 1.427074730719344         | 1.0590213938428223        | 1.2499924648636591        | 1.0624935951341103                    |
| 1.0069383744735032  | 1.135409822251157         | 0.7673564853746352        | 1.2256870558246435        | 0.5763854143537984                    |
| 1.3437418997284336  | 0.42360855753712895       | 1.5277685681666946        | 0.38194214204167365       | 1.7117952366049554                    |
| 0.36110893429394597 | 1.798600268887154         | 0.3645811355852339        | 1.9999879437818546        | 0.3715255381678098                    |
| 2.1840146122201154  | 0.4409695639935686        | 2.347208072910649         | 0.5659688104799345        | 2.451374111649287                     |
| 0.7604120827920593  | 2.4895683258534547        | 0.9131889396087288        | 2.520818137475046         | 1.0972156080469897                    |
| 2.5034571310186062  | 1.2881866790678265        | 2.4965127284360302        | 1.4617967436322237        | 2.4965127284360302                    |
| 1.5972125939924533  | 2.538179143931486         | 1.7708226585568505        | 2.6006787671746685        | 1.9965157424905666                    |
| 2.5972065658833805  | 2.1145705863943567        | 2.5173459361837582        | 2.2395698328807225        | 2.4340131051928475                    |
| 2.3715134819496644  | 2.3367914690367853        | 2.4965127284360302        | 2.281236248376178         | 2.6041509684659565                    |
| 2.2360976315894345  | 2.677067195583003         | 1.2152704519507798        | 2.63192857879626          | NA NA                                 |
| 39                  | 1.7881607315303831        | 1.4446191273137365        | 1.3296936038777876        | 2.6804377661283105 1.2700503551550373 |
| 2.5506259894964423  | 1.1893565480595514        | 2.445373197632765         | 1.1191880201504334        | 2.336611979373632                     |
| 1.0630531978231388  | 2.234867613905411         | 0.9683256851458294        | 2.1015474108780863        | 0.9542919795640058                    |
| 1.933142943896203   | 0.9893762435185649        | 1.8349070048234377        | 1.0279689338685798        | 1.7331626393552164                    |
| 1.0805953298004183  | 1.5928255835369802        | 1.0946290353822419        | 1.4384548221369207        | 1.091120608986786                     |
| 1.2735587815504932  | 1.0630531978231388        | 1.136730152127713         | 1.091120608986786         | 0.9332414211912704                    |
| 1.1507638577095365  | 0.7051937054866366        | 1.1823396952686396        | 0.543806091295665         | 1.2875924871323168                    |
| 0.3754016243137817  | 1.3963537053914497        | 0.29119939082284          | 1.5226570556278622        | 0.27014883245010457                   |
| 1.641943553073363   | 0.23857299489100145       | 1.8419238576143495        | 0.26313197965919277       | 2.013836750991689                     |
| 0.21752243651826603 | 2.2489013194872345        | 0.26664040605464867       | 2.445373197632765         | 0.3929437562910612                    |
| 2.56115126868281    | 0.6209914719956949        | 2.634828222987384         | 0.8104464973503138        | 2.6488619285692074 1.0665616242185947 |
| 2.631319796591928   | 1.3577610150414348        | 2.6488619285692074        | 1.5787918779551566        | 2.726047309269237                     |
| 1.7787721824961433  | 2.7821821315965316        | 1.971735634246218         | 2.77516527880562          | 2.1225979692508217 2.6909630453146782 |
| 2.2173254819281314  | 2.6137776646146484        | 2.368187816932735         | 2.5190501519373387        | 2.4839658879827797                    |
| 2.4488816240282207  | 2.6032523854282807        | 2.4173057864691176        | 2.6804377661283105        | 1.3296936038777876                    |
| 2.6804377661283105  |                           |                           |                           |                                       |
| 37                  | 1.8723136125344095        | 1.4473122148545685        | 1.4275098261312074        | 2.689511266624014 1.3309632678421401  |
| 2.541243337822946   | 1.234416709553073         | 2.403319683124279         | 1.1930396131434728        | 2.3067731248352117 1.1171816030592057 |
| 2.1998822924437444  | 1.0413235929749387        | 2.086095277317344         | 1.0240831361376053        | 1.9861006276608102                    |
| 1.0413235929749387  | 1.9412754398837433        | 1.0861487807520056        | 1.7964556024501426        | 1.1275258771616057                    |
| 1.6033624858720081  | 1.1620067908362726        | 1.4344060088661406        | 1.1654548822037394        | 1.2482090750229398                    |
| 1.148214425366406   | 1.0482197757098721        | 1.1551106081013391        | 0.851678567764271         | 1.1964877045109394                    |
| 0.6723778166560035  | 1.2551052577578732        | 0.42756332956586884       | 1.3930289124565405        | 0.2655030352949347                    |
| 1.5481930239925412  | 0.18274884247573428       | 1.7205975923658754        | 0.18274884247573428       | 1.9481716226186767                    |
| 0.2172297561504011  | 2.1550571046666778        | 0.16206029427093416       | 2.392975409021879         | 0.18964502521066764                   |

|                     |                     |                     |                     |                     |
|---------------------|---------------------|---------------------|---------------------|---------------------|
| 2.6033089824373468  | 0.3896343245237353  | 2.6998555407264138  | 0.6585854511861367  | 2.7688173680757475  |
| 0.9033999382762713  | 2.7584730939733473  | 1.1757991563061394  | 2.7619211853408143  | 1.4378541002336074  |
| 2.8239868299552144  | 1.6516357650165419  | 2.9101891141418816  | 1.879209795269343   | 2.9136372055093482  |
| 2.030925815437877   | 2.8032982817504144  | 2.1998822924437444  | 2.7619211853408143  | 2.3102212162026783  |
| 2.717095997563747   | 2.3964235003893455  | 2.59986089106988    | 2.54813952055788    | 2.544691429190413   |
| 1.4275098261312074  | 2.689511266624014   | NA                  | NA                  | 2.6377898961120136  |
| 38                  | 1.7385678437120404  | 1.3744585556800302  | 1.2055675948236897  | 2.616708854660667   |
| 2.4877897766014865  | 1.104522912020548   | 2.4111351896473794  | 1.0069625286244113  | 2.2787318121811935  |
| 0.9790881333683722  | 2.153297033529018   | 0.8884963487862452  | 2.0417994525048617  | 0.8606219535302062  |
| 1.9128803744456808  | 0.8989492470072599  | 1.79092989520051    | 0.9407608398913184  | 1.6585265177343245  |
| 1.4947644456050948  | 1.0174154268454259  | 1.3275180740688606  | 1.0243840256594356  | 1.0975543132065382  |
| 1.0313526244734454  | 0.8153260612391426  | 1.0836171155785186  | 0.6202052944468692  | 1.19163039719567    |
| 0.4390217252826153  | 1.3031279782198264  | 0.31707124603744435 | 1.4982487450120998  | 0.24041665908333695 |
| 1.6271678230712805  | 0.23693235967633205 | 1.7735083981654856  | 0.2508695573043516  | 1.9477233685157298  |
| 0.23344806026932718 | 2.0243779554698373  | 0.23693235967633205 | 2.1637499317500324  | 0.28222825196739554 |
| 2.362354997949311   | 0.39024153358454694 | 2.4668839801594573  | 0.5644565039347911  | 2.4982426748225013  |
| 0.7491243725060499  | 2.53308566889255    | 0.9930253309963917  | 2.5296013694855453  | 1.2613163853357678  |
| 2.5226327706715357  | 1.4355313556860119  | 2.553991465334579   | 1.6201992242572707  | 2.595803058218638   |
| 1.7978984940145197  | 2.6341303516956915  | 1.9755977637717688  | 2.606255956439653   | 2.094063943609935   |
| 2.5191484712645305  | 2.1916243270060716  | 2.439009584903418   | 2.3484178003212914  | 2.355386399135301   |
| 2.2647946145531743  | 2.6341303516956915  | 1.2055675948236897  | 2.616708854660667   | 2.480821177787477   |
| 44                  | 1.7407196829870777  | 1.3076219297062075  | 1.2041450405201313  | 2.6781846590878784  |
| 2.5432373700640705  | 1.0103745742295356  | 2.4082900810402625  | 0.927330088676423   | 1.1107199942728798  |
| 0.8339050424291714  | 2.1729973719731106  | 0.7577809306721516  | 2.058811204337581   | 2.2975641003027794  |
| 1.8858018594352632  | 0.8339050424291714  | 1.7300934490231772  | 0.8927282196959595  | 0.7785420520604297  |
| 0.9238699017783767  | 1.4705794316697007  | 0.9342504624725158  | 1.3598534509322173  | 1.5501637303247668  |
| 1.2525876570927803  | 0.868506911409635   | 1.1141801811709262  | 0.868506911409635   | 0.8892680327979131  |
| 0.9169495279822839  | 0.761241117570198   | 0.9342504624725158  | 0.6020725202600656  | 0.9584717707588402  |
| 0.42560298845970157 | 1.07265793839437    | 0.2525936435573839  | 1.179923732233807   | 0.9792328921471183  |
| 0.16262878420817867 | 1.5640044779169522  | 0.1972306531886422  | 0.20761121388278125 | 1.40483588060682    |
| 1.844279616658707   | 0.32871775531440367 | 1.982687092580561   | 1.7058721407368527  | 0.24567326976129117 |
| 0.1972306531886422  | 2.404829894142216   | 0.2283723352710594  | 0.2525936435573839  | 2.214519614749667   |
| 2.605520734228905   | 0.3944613063772844  | 2.667804098393739   | 2.5328568093699313  | 0.31487700772221827 |
| 2.730087462558574   | 1.0138347611275818  | 0.5259484085030459  | 2.730087462558574   | 0.878887472103774   |
| 2.674724472189832   | 1.5363229827325813  | 2.737007836354666   | 2.667804098393739   | 1.3702340116263563  |
| 2.7750698922331765  | 2.128014942298508   | 2.69548559357811    | 1.73701382281927    | 2.7785300791312224  |
| 2.47749381900119    | 2.5155558748797     | 2.3771483989578455  | 2.7785300791312224  | 1.934244476007912   |
| 1.2041450405201313  | 2.6781846590878784  | 1.2278840536321542  | 2.3148650347930113  | 2.7162467149663883  |
| 39                  | 1.7814760894133412  | 1.361822054363254   | 2.479577493345819   | 1.139449191043689   |
| 2.367333244675843   | 1.1020344414870304  | 2.278898382087378   | 1.0067968971609909  | 2.2176742464492096  |
| 0.9319673980476739  | 2.102028656910447   | 0.8333285128528471  | 1.9829817265028975  | 0.8095191267713372  |
| 1.8571321143577737  | 0.8639405806719314  | 1.6734597074432684  | 0.9013553302285897  | 1.530603390954209   |
| 0.9557767841291839  | 1.3571350066460652  | 0.9183620345725254  | 1.1734625997315602  | 0.9183620345725254  |
| 0.9455727615228224  | 0.9523754432603967  | 0.7584990137395302  | 0.9897901928170552  | 0.5680239250874509  |
| 1.0986331006182433  | 0.3673448138290102  | 1.2618974623200256  | 0.23809386081509917 | 1.452372550972105   |
| 0.1972777703896536  | 1.6394462987553973  | 0.22448849733995066 | 1.8469280917514121  | 0.3163247007972032  |
| 2.0408045212722787  | 0.24489654255267343 | 2.2278782690555707  | 0.24829788342146059 | 2.380938608150992   |
| 0.32312738253477746 | 2.510189561164903   | 0.4829904033677726  | 2.56120967419671    | 0.6564587876759163  |
| 0.8129204676401244  | 2.6394405141788138  | 0.9353687389164611  | 2.6564472185227492  | 2.602025764622155   |
| 2.625835150703665   | 1.5442087544293575  | 2.646243195916388   | 1.6734597074432684  | 2.693861968079408   |
| 2.7108686724233437  | 1.945566976946239   | 2.666651241129111   | 2.071416589091363   | 1.8231187056699023  |
| 2.510189561164903   | 2.275497041218591   | 2.3911426307573533  | 2.5850190602782197  | 2.1870621786301254  |
| 2.275497041218591   | 2.5408016289839868  | 1.2278840536321542  | 2.340122517725546   | 2.46597212987067    |
| 2.479577493345819   |                     |                     |                     |                     |

|                     |                    |                     |                     |                     |                    |
|---------------------|--------------------|---------------------|---------------------|---------------------|--------------------|
| 41                  | 1.888452380952381  | 1.5284319727891156  | 1.316326530612245   | 2.697278911564626   | 1.2312925170068028 |
| 2.5714285714285716  | 1.1938775510204083 | 2.5170068027210886  | 1.08843537414966    | 2.4081632653061225  |                    |
| 1.0034013605442176  | 2.2687074829931975 | 0.9319727891156463  | 2.1258503401360542  | 0.9659863945578231  | 2.0                |
| 1.030612244897959   | 1.8129251700680271 | 1.0748299319727892  | 1.6360544217687074  | 1.08843537414966    | 1.4727891156462585 |
| 1.0816326530612246  | 1.2585034013605443 | 1.1258503401360545  | 1.0170068027210883  | 1.1564625850340136  |                    |
| 0.8605442176870748  | 1.1870748299319729 | 0.7142857142857143  | 1.2585034013605443  | 0.5816326530612245  |                    |
| 1.3979591836734695  | 0.5034013605442177 | 1.5578231292517006  | 0.4965986394557823  | 1.7142857142857142  |                    |
| 0.5306122448979592  | 1.8605442176870748 | 0.6224489795918368  | 1.9591836734693877  | 0.6904761904761905  |                    |
| 2.1258503401360542  | 0.5918367346938775 | 2.261904761904762   | 0.54421768707483    | 2.391156462585034   | 0.5340136054421769 |
| 2.5170068027210886  | 0.6054421768707483 | 2.622448979591837   | 0.7448979591836735  | 2.6598639455782314  |                    |
| 0.8809523809523809  | 2.697278911564626  | 1.0816326530612246  | 2.7108843537414966  | 1.3639455782312926  |                    |
| 2.683673469387755   | 1.564625850340136  | 2.663265306122449   | 1.6870748299319729  | 2.683673469387755   | 1.836734693877551  |
| 2.7244897959183674  | 2.0170068027210886 | 2.7312925170068025  | 2.1904761904761907  | 2.6904761904761907  |                    |
| 2.292517006802721   | 2.6156462585034013 | 2.3741496598639458  | 2.554421768707483   | 2.4829931972789114  | 2.442176870748299  |
| 2.5884353741496597  | 2.3639455782312924 | 2.6802721088435373  | 2.2857142857142856  | 2.761904761904762   |                    |
| 1.316326530612245   | 2.697278911564626  |                     |                     |                     |                    |
| 38                  | 1.8467606847908704 | 1.5091415352030884  | 1.3597280815728094  | 2.619476157147618   | 1.3130707454404091 |
| 2.5228288180162175  | 1.2497500749750088 | 2.442844813217817   | 1.143104735243808   | 2.3661934752860168  |                    |
| 1.0931147322448076  | 2.2462174680884157 | 1.0097980605798071  | 2.156235462690215   | 0.9798040587804069  |                    |
| 2.012930787426414   | 1.016463394313007  | 1.8229687760302127  | 1.0564553967122075  | 1.692994768232812   | 1.0964473991114077 |
| 1.5030327568366106  | 1.0464573961124073 | 1.143104735243808   | 1.0764513979118076  | 1.003132726846607   |                    |
| 1.1164434003110077  | 0.7598480455848053 | 1.1864294045096082  | 0.5932147022548041  | 1.309738078573809   |                    |
| 0.45990802759080324 | 1.4730387550372104 | 0.4665733613240033  | 1.6496700989670117  | 0.5332266986560037  |                    |
| 1.7529827718316122  | 0.6032127028546043 | 1.8063054416972126  | 0.6398720383872045  | 1.9596081175608138  |                    |
| 0.5398920323892038  | 2.2128907994224156 | 0.4532426938576032  | 2.426181478884817   | 0.5032326968566035  |                    |
| 2.559488153548818   | 0.6632007064534047 | 2.592814822214818   | 0.853162717849606   | 2.6261414908808183  | 1.0397920623792072 |
| 2.6528028258136187  | 1.2297540737754087 | 2.6428048252138185  | 1.3597280815728094  | 2.619476157147618   |                    |
| 1.6829967676330118  | 2.6661334932800185 | 1.876291445895813   | 2.722788830012219   | 2.0229287880262143  | 2.716123496279019  |
| 2.142904795223815   | 2.622808824014218  | 2.2762114698878158  | 2.5261614848828176  | 2.402852810818617   | 2.442844813217817  |
| 2.4961674830834175  | 2.399520143952017  | 2.559488153548818   | 2.3595281415528166  | 2.6394721583472185  |                    |
| 1.3597280815728094  | 2.619476157147618  |                     |                     |                     |                    |
| 39                  | 2.0375927182081854 | 1.3411216355105107  | 1.4980606703215347  | 2.6387857679058224  | 1.3743675874509491 |
| 2.480733495348963   | 1.2506745045803638 | 2.3364248986666136  | 1.1544687734587973  | 2.1989881399215188  |                    |
| 1.0616989613058583  | 2.082166894988188  | 1.0479552854313487  | 1.8863195137764277  | 1.1063659078980141  |                    |
| 1.6732925377215306  | 1.1544687734587973 | 1.4774451565097704  | 1.1647765303646793  | 1.3090851270470292  |                    |
| 1.123545502741151   | 1.133853259647033  | 1.1544687734587973  | 0.9380058784352728  | 1.1682124493333068  |                    |
| 0.8211846335019422  | 1.254110423548991  | 0.580670305698026   | 1.3331365598274207  | 0.40543843829803    | 1.4946247513529072 |
| 0.27143759852156246 | 1.632061510098002  | 0.2508220847097982  | 1.7488827550313328  | 0.27487351749018984 |                    |
| 1.8382166482156446  | 0.3264123020196004 | 1.9756534069607394  | 0.41574619520391215 | 2.1440134364234806  |                    |
| 0.2954890313019541  | 2.3707840883528872 | 0.26112984161568037 | 2.6387857679058224  | 0.32297638305097304 |                    |
| 2.755607012839153   | 0.4432335469529311 | 2.8311972301489554  | 0.6734401178509651  | 2.865556419835229   | 0.893338931843117  |
| 2.9274029612705217  | 1.1201095837725237 | 2.8999156095215026  | 1.233494909737227   | 2.8793000957097385  |                    |
| 1.4430859668234965  | 2.9067874474587576 | 1.611445996286238   | 2.9583262319881682  | 1.8038574585293707  |                    |
| 3.002993178580324   | 1.9584738121176026 | 2.9961213406430693  | 2.064987300145051   | 2.923967042301894   | 2.1818085450783817 |
| 2.8243253922117004  | 2.2917579520744575 | 2.7349914990273887  | 2.3982714401019063  | 2.645657605843077   |                    |
| 2.4944771712234726  | 2.5494518747215107 | 2.6284780109999404  | 1.4980606703215347  | 2.6387857679058224  |                    |
| 39                  | 2.0535194266876307 | 1.6844990791948997  | 1.5153734070428782  | 3.0076700616942404  | 1.3999896450852987 |
| 2.846132794953629   | 1.2961442593234769 | 2.7422874091918072  | 1.1769143719673114  | 2.6038268948427117  |                    |
| 1.0961457385970057  | 2.4961353836823044 | 1.030761606821044   | 2.3769054963261387  | 1.023069356023872   | 2.226906605781285  |
| 1.061530610009732   | 2.111522843823706  | 1.1307608671842797  | 1.8884475707057187  | 1.1884527481630693  |                    |
| 1.7692176833495532  | 1.1615298703729675 | 1.6346032943990436  | 1.1230686163871075  | 1.4346047736725724  |                    |
| 1.1307608671842797  | 1.2192217513517574 | 1.1884527481630693  | 0.9307623464578084  | 1.2499907545404452  |                    |
| 0.6692258193539614  | 1.3807590180923686 | 0.503842427214764   | 1.6115265420075278  | 0.4307660446416303  |                    |

|                     |                     |                     |                     |                     |
|---------------------|---------------------|---------------------|---------------------|---------------------|
| 1.803832811936827   | 0.4653811732289042  | 2.007677458061884   | 0.5499959319977958  | 2.2615217343685594  |
| 0.4576889224317322  | 2.55767339005968    | 0.4307660446416303  | 2.7422874091918072  | 0.52691917960628    |
| 2.861517296547973   | 0.6923025717454773  | 2.8961324251352467  | 0.8769165908776045  | 2.9269014283239345  |
| 1.0346077322196299  | 2.9461320553168644  | 1.1192224909885216  | 2.9730549331069667  | 1.530757908637222   |
| 2.9499781807154504  | 1.6384494197976296  | 2.9461320553168644  | 1.8192173135311709  | 3.0384390648829283  |
| 2.08844609143219    | 3.080746444267374   | 2.238444981977043   | 3.080746444267374   | 2.357674869333209   |
| 2.9999778108970685  | 2.4769047566893745  | 2.9269014283239345  | 2.619211396437056   | 2.826902167960699   |
| 2.7076722806045335  | 2.746133534590393   | 2.823056042562113   | 2.642288148828572   | 2.9807471839041386  |
| 1.5153734070428782  | 3.0076700616942404  | 37                  | 2.173590486618477   | 1.45456972450769    |
| 1.551314279461674   | 2.880465032481923   | 1.4555541387541633  | 2.734909618606507   | 1.309998724878747   |
| 2.558710959704687   | 1.1721041222599315  | 2.3825123008028672  | 1.0801743871807212  | 2.210144047529348   |
| 1.0993264153222233  | 1.9726588985747213  | 1.1567824997467298  | 1.7849690227880002  | 1.2180689897995367  |
| 1.5628054963465754  | 1.24871223482594    | 1.3789460261881548  | 1.1874257447731331  | 1.1606129053750303  |
| 1.2372210179410388  | 0.9307885676770045  | 1.283185885480644   | 0.7507595031468842  | 1.363624403674953   |
| 0.48646151479415456 | 1.4747061668956654  | 0.3638885346885408  | 1.685378476452189   | 0.2796196108659314  |
| 1.8462555128408071  | 0.2834500164942318  | 2.0262845773709275  | 0.3217540727772361  | 2.148857557476541   |
| 0.39070137408664385 | 2.397833923316069   | 0.2949412333791331  | 2.646810289155597   | 0.2719587996093305  |
| 2.895786654995125   | 0.3638885346885408  | 3.0260204463573395  | 0.5094439485639571  | 3.0987981532950477  |
| 0.7086250412355795  | 3.1102893701799488  | 0.900145322650601   | 3.1294413983214513  | 1.0610223590392192  |
| 3.1332718039497514  | 1.3866068374447555  | 3.0911373420384467  | 1.5972791470012793  | 3.1141197758082493  |
| 1.8117818621861033  | 3.171575860232756   | 2.0569278223973306  | 3.2060495108874596  | 2.2331264812991507  |
| 3.1332718039497514  | 2.3825123008028672  | 3.022190040729039   | 2.558710959704687   | 2.868973815597022   |
| 2.6774535341820003  | 2.7847048917744126  | 2.7847048917744126  | 2.700435967951803   | 2.876634626853623   |
| 1.551314279461674   | 2.880465032481923   | 37                  | 1.9812623016012767  | 1.4799666554655444  |
| 1.4999892390965144  | 2.9014943362321466  | 1.3674144326107114  | 2.742404568449183   | 1.2234760712832682  |
| 2.5984662071217395  | 1.1174162260946257  | 2.450739994180416   | 1.0227199357476235  | 2.306801632852973   |
| 1.007568529292103   | 2.140136161842249   | 1.0302956389753837  | 1.9772585424454054  | 1.1022648196391054  |
| 1.7537752972264802  | 1.136355484164026   | 1.5568070133047158  | 1.132567632550146   | 1.4052929487495123  |
| 1.0833255615697048  | 1.2234760712832682  | 1.1174162260946257  | 1.0340834905892637  | 1.1855975551444673  |
| 0.8522666131230195  | 1.2348396261249084  | 0.6060562582208139  | 1.3371116196996706  | 0.42423938075456974 |
| 1.5037770907103944  | 0.31060383233816713 | 1.6704425617211183  | 0.3143916839520472  | 1.8030173682069215  |
| 0.3522702000908481  | 1.9507435811482448  | 0.43181508398232993 | 2.136348310228369   | 0.34090664524920783 |
| 2.3408922973778936  | 0.30681598072428706 | 2.5946783555078596  | 0.30681598072428706 | 2.7651316781324633  |
| 0.39393656784352904 | 2.890130781390506   | 0.5454506323987325  | 2.9431607039848275  | 0.8219638002119789  |
| 2.996190626579149   | 1.1818097035305872  | 2.973463516895868   | 1.4848378326409941  | 2.988614923351389   |
| 1.7348360391570798  | 3.0605841040151103  | 1.9961978005148058  | 3.087099065312271   | 2.2007417876643305  |
| 3.0302812911040697  | 2.3371044457640138  | 2.912857891073787   | 2.5075577683886174  | 2.784070936201864   |
| 2.6401325748744204  | 2.696950349082622   | 2.7764952329741037  | 2.61740546519114    | 2.840888710410065   |
| 1.4999892390965144  | 2.9014943362321466  | 34                  | 1.9544445349937594  | 1.3161720863532294  |
| 1.5286907512129575  | 2.5286613929838397  | 1.4444020381134963  | 2.4137222387573014  | 1.3409567993096119  |
| 2.3141083050943014  | 1.2298489502239582  | 2.176181320022456   | 1.1149097959974201  | 2.0305917246688407  |
| 1.0995845754338818  | 1.8811708241743412  | 1.1187411011383048  | 1.7317499236798417  | 1.1685480679698046  |
| 1.5363533614947267  | 1.1723793731106893  | 1.2643306964919199  | 1.1570541525471507  | 1.0651028291659204  |
| 1.1800419833924585  | 0.8390558258537286  | 1.2145237296604199  | 0.6398279585277291  | 1.2758246119145735  |
| 0.44826270148349884 | 1.448233432543808   | 0.32182963183430685 | 1.601485548889765   | 0.2950104958481146  |
| 1.758569059666034   | 0.3294922421160761  | 1.9156525704423026  | 0.40228703979288355 | 2.183843930304225   |
| 0.2950104958481146  | 2.4252161541799553  | 0.31033571641165303 | 2.582299664956224   | 0.39462442951111437 |
| 2.658925767773916   | 0.544045330005614   | 2.685744903760108   | 0.7011288407818828  | 2.7010701243236466  |
| 0.8313932155719593  | 2.7393831757324927  | 1.1608854576880354  | 2.72022665002807    | 1.3639446301549194  |
| 2.7623710065778004  | 1.5478472769173806  | 2.8313344991137233  | 1.7432438391024954  | 2.854322329959031   |
| 1.9156525704423026  | 2.796852752845762   | 2.068904776077687   | 2.7010701243236466  | 2.1991691508677635  |
| 2.612950106083301   | 2.337096135939609   | 2.517167477561186   | 2.4865170364341087  | 1.5286907512129575  |
| 2.5286613929838397  | NA                  | NA                  | NA                  | NA                  |
| NA                  | NA                  | NA                  | NA                  | NA                  |
| 33                  | 1.799290851987643   | 1.3860960821337966  | 1.334418308444367   | 2.662147803312572   |
| 1.2273972912257713  |                     |                     |                     |                     |

|                     |                     |                     |                     |                     |
|---------------------|---------------------|---------------------|---------------------|---------------------|
| 2.5116494978489214  | 1.0969654264906075  | 2.384562039901839   | 0.9799111889077683  | 2.2374081412262696  |
| 0.8963010192057403  | 2.100287462914944   | 0.8829233920534159  | 1.9631667846036178  | 0.9230562735103893  |
| 1.7792244112591562  | 0.9665335617554438  | 1.585248817550451   | 1.0033220364243363  | 1.4180284781463952  |
| 0.9464671210269572  | 1.110343053642932   | 0.9799111889077683  | 0.8695457649010914  | 1.023388477152823   |
| 0.6153708490069262  | 1.1203762740071754  | 0.3812623738412477  | 1.307663054139718   | 0.277585763410733   |
| 1.5016386478484232  | 0.26086372947032743 | 1.665514580464398   | 0.3110298312915442  | 1.8227016995042107  |
| 0.3912955942054911  | 2.026710513577159   | 0.277585763410733   | 2.2842298362594056  | 0.24748610231800292 |
| 2.501616277484678   | 0.3578515263246799  | 2.635392549007923   | 0.5685491539737905  | 2.668836616888734   |
| 0.7625247476824955  | 2.7256915322861133  | 1.0300772907289852  | 2.6922474644053023  | 1.3912732238417462  |
| 2.7390691594384378  | 1.6120040718551     | 2.8360569562927904  | 1.9029674624181576  | 2.8260237359285467  |
| 2.0768766153983758  | 2.722347125498032   | 2.247441361590513   | 2.555126786093976   | 2.4313837349349745  |
| 2.471516616391948   | 2.571848820034382   | 2.4146617009945692  | 2.632048142219842   | 1.334418308444367   |
| 2.662147803312572   | NA                  | NA                  | NA                  | NA                  |
| NA                  | NA                  | NA                  | NA                  | NA                  |
| 36                  | 1.8297071148481736  | 1.3969282709666044  | 1.3590297956287498  | 2.44625363213175    |
| 1.2684278092535     | 2.2952503215063333  | 1.1476251607531667  | 2.1643807856309722  | 1.0570231743779166  |
| 2.0133774750055555  | 1.010044366627787   | 1.8959304556302314  | 1.0637344326279352  | 1.748282774129824   |
| 1.0939350947530184  | 1.5771456887543518  | 1.140913902503148   | 1.439564894628972   | 1.1610476772532037  |
| 1.2852059548785462  | 1.1342026442531297  | 1.1442695316281573  | 1.154336419003185   | 0.9630655588776573  |
| 1.1845370811282685  | 0.8221291356272684  | 1.2214490015033703  | 0.6979708580019259  | 1.2852059548785462  |
| 0.5402562891264907  | 1.4462761528789907  | 0.4328761571261944  | 1.6006350926294166  | 0.43958741537621293 |
| 1.7315046285047777  | 0.48656622312634257 | 1.8724410517551666  | 0.5436119182515     | 2.046933766255648   |
| 0.4764993357513148  | 2.26504965938125    | 0.466432448376287   | 2.432831115631713   | 0.5603900638765462  |
| 2.5200774728819537  | 0.7885728443771759  | 2.5569893932570555  | 0.9429317841276018  | 2.5871900553821385  |
| 1.140913902503148   | 2.526788731131972   | 1.4563430402540185  | 2.5569893932570555  | 1.5469450266292684  |
| 2.5939013136321574  | 1.7180821120047407  | 2.634168863132268   | 1.8959304556302314  | 2.6207463466322314  |
| 2.0301556206306017  | 2.526788731131972   | 2.124113236130861   | 2.4663874068818052  | 2.228137739006148   |
| 2.382496678756574   | 2.305317208881361   | 2.3019615797563517  | 2.405986082631639   | 2.2583384011312315  |
| 2.473098665131824   | 1.3590297956287498  | 2.44625363213175    | NA                  | NA                  |
| 42                  | 1.9058999520971311  | 1.3344638392530241  | 1.410826537778409   | 2.7463176779084564  |
| 1.304672113819354   | 2.6367389176926577  | 1.2087906986305301  | 2.527160157476859   | 1.0957876021579875  |
| 2.4004597159773415  | 1.0204522045096258  | 2.29772962827503    | 0.9382681343477769  | 2.208696885599694   |
| 0.9279951255775457  | 2.0717234353299454  | 0.9553898156314954  | 1.8868092774657848  | 1.006754859482651   |
| 1.6813491020611622  | 1.054695567077063   | 1.469040254143052   | 0.9930575144556762  | 1.338915476386791   |
| 0.9793601694287014  | 1.1711229998063493  | 1.0033305232259073  | 0.9382681343477769  | 1.0512712308203194  |
| 0.7362322951998979  | 1.0889389296445002  | 0.5273477835385315  | 1.160849991036118   | 0.3698283157283208  |
| 1.2875504325356353  | 0.2705225642827532  | 1.4484942366025897  | 0.23285486545857237 | 1.6060137044128004  |
| 0.2465522104855472  | 1.7395628184258052  | 0.284219909309728   | 1.8902336137225286  | 0.34928229818785855 |
| 2.0546017540462267  | 0.24997654674229092 | 2.2463645844238744  | 0.20546017540462266 | 2.4175813972610602  |
| 0.2191575204315975  | 2.5751008650712706  | 0.29449291807995914 | 2.6744066165168383  | 0.4074960145525016  |
| 2.7291959966247377  | 0.5444694648222501  | 2.7565906866786873  | 0.6814429150919985  | 2.783985376732637   |
| 0.8423867191589529  | 2.845623429354024   | 1.1300309647254247  | 2.8285017480703054  | 1.314945122589585   |
| 2.797682721759612   | 1.4313725553188712  | 2.845623429354024   | 2.903837145718667   | 1.8080495435606794  |
| 2.965475198340054   | 2.027207063992277   | 2.931231835772617   | 2.1710291867755127  | 2.845623429354024   |
| 2.308002637045261   | 2.7223473241112504  | 2.455249096085241   | 2.62989024517917    | 2.5785252013280147  |
| 2.5100384761931402  | 2.7086499790842753  | 1.410826537778409   | 2.7463176779084564  | 34                  |
| 1.7419419334703061  | 1.2359910610010814  | 1.254969965071793   | 2.3589408701750547  | 1.1878592717524457  |
| 2.2280750182023272  | 1.0670600237776207  | 2.103920235561535   | 0.9462607758027957  | 1.9562767102589713  |
| 0.8892166864813505  | 1.7314558876391581  | 0.9261275678069916  | 1.5200572036832143  | 0.9831716571284367  |
| 1.0804821624414902  | 1.348924935718879   | 1.0267936077860123  | 1.2482588957398582  | 0.9630384491326325  |
| 1.0603489544456859  | 0.9764605877965019  | 0.8657279438195791  | 1.013371469122143   | 0.7113733491850804  |
| 0.26508723861142147 | 0.5234634078909083  | 1.1576594597587395  | 0.3389090012627034  | 1.3287917277230747  |
| 0.26508723861142147 | 1.5502570156769206  | 0.26508723861142147 | 1.6811228676496477  | 0.31877579326689925 |
| 1.7650112342988318  | 0.37917541725431175 | 1.9596322449249386  | 0.26508723861142147 | 2.197875206208621   |
| 0.25837616927948676 | 2.3690074741729568  | 0.3925975559181812  | 2.4361181674923036  | 0.5838630318783208  |
| 2.499873326145684   | 0.8120393891641012  | 2.5267176034734224  | 1.013371469122143   | 2.4830956528158468  |
| 1.191214806418413   | 2.5367842074713245  | 1.4495909756978997  | 2.587117227460835   | 1.6442119863240068  |
| 2.6072504354566393  |                     |                     |                     |                     |

|                     |                     |                     |                     |                     |                    |
|---------------------|---------------------|---------------------|---------------------|---------------------|--------------------|
| 1.8388329969501136  | 2.53007313813939    | 1.9596322449249386  | 2.446184771490206   | 2.083787027565731   | 2.325385523515381  |
| 2.1844530675447515  | 2.2549192955300663  | 2.2851191075237725  | 2.204586275540556   | 2.345518731511185   | 1.254969965071793  |
| 2.3589408701750547  | NA                  | NA                  | NA                  | NA                  | NA                 |
| 43                  | 1.749594874481706   | 1.4040545796719412  | 1.322853800620002   | 2.67291282079003    | 1.2378374895261715 |
| 2.5742938999211864  | 1.166423788207354   | 2.479075631496096   | 1.057602910007251   | 2.3906586679585127  | 0.9895898611321866 |
| 2.268235179983397   | 0.918176159813369   | 2.1798182164458133  | 0.8671663731570707  | 2.067596685801957   | 0.870567025600824  |
| 1.9247692831643217  | 0.8909709402633432  | 1.8567562342892574  | 0.9283781171446287  | 1.618710563226532   |                    |
| 0.9725865989134205  | 1.4826844654764033  | 0.9657852940259141  | 1.3160524957324955  | 0.9249774647008755  |                    |
| 1.152821178432341   | 0.9487820318071479  | 1.0031924709071995  | 0.9793879038009269  | 0.8399611536070449  |                    |
| 0.9997918184634462  | 0.6903324460819034  | 1.026997038013472   | 0.5407037385567618  | 1.1018113917760428  |                    |
| 0.4012769883628798  | 1.2378374895261715  | 0.3332639394878154  | 1.3772642397200534  | 0.31966132971280253 |                    |
| 1.526892947245195   | 0.35366785415033475 | 1.6595183925515706  | 0.41487959813789266 | 1.7649386183079203  |                    |
| 0.46929003723794416 | 1.9519745027143474  | 0.36046915903784116 | 2.213824740883345   | 0.2890554577190236  |                    |
| 2.400860625289772   | 0.3468665492628283  | 2.5436880279274074  | 0.4760913421254506  | 2.587896509696199   |                    |
| 0.5951141776568133  | 2.6219030341337315  | 0.7957526718382532  | 2.6695121683462766  | 0.9929905135759398  |                    |
| 2.67291282079003    | 1.2412381419699248  | 2.6559095585712638  | 1.445277288595118   | 2.696717387896302   | 1.649316435220311  |
| 2.7307239123338345  | 1.7819418805266865  | 2.771531741658873   | 1.9689777649331135  | 2.7783330465463796  |                    |
| 2.0777986431332165  | 2.706919345227562   | 2.2036227835520856  | 2.6389062963524976  | 2.3294469239709548  |                    |
| 2.523284113264888   | 2.4484697595023173  | 2.441668454614811   | 2.553889985258667   | 2.3906586679585127  | 2.659310211015017  |
| 1.322853800620002   | 2.67291282079003    |                     |                     |                     |                    |
| 35                  | 1.78705061264202    | 1.3631172210935694  | 1.317560048642433   | 2.5709312744022856  | 1.2331010711653538 |
| 2.4425536286371257  | 1.0912099890038611  | 2.2939058282774667  | 0.9999942933286158  | 2.1655281825123063  |                    |
| 0.9121569567524536  | 2.0337721776480633  | 0.9155353158515367  | 1.8479624271984894  | 0.9763457796350337  |                    |
| 1.7229631405324124  | 1.0135077297249484  | 1.5236399536865057  | 1.0337778843194474  | 1.317560048642433   |                    |
| 1.0202644479231147  | 1.0168860888240316  | 1.023642807022198   | 0.8276979792753746  | 1.0337778843194474  |                    |
| 0.6587800243212165  | 1.1418853754901086  | 0.4695919147725594  | 1.300668253147017   | 0.37499785999823093 |                    |
| 1.4560727717048425  | 0.37161950089914775 | 1.6385041630553332  | 0.42567324648447835 | 1.7871519634149924  |                    |
| 0.5067538648624742  | 2.0135020230535643  | 0.38175457819639724 | 2.1790416189086392  | 0.36824114180006456 |                    |
| 2.3344461374664647  | 0.42229488738539517 | 2.432418551339876   | 0.5506725331505553  | 2.4662021423307077  |                    |
| 0.6858068971138818  | 2.48985065602429    | 0.8175629019781251  | 2.540526042510537   | 0.9493189068423683  | 2.5236342470151216 |
| 1.3344518441378488  | 2.5641745562041196  | 1.527018312785589   | 2.6486335336811986  | 1.7871519634149924  |                    |
| 2.6722820473747806  | 1.9526915592700673  | 2.614849942690367   | 2.1047177187288097  | 2.5303909652132877  |                    |
| 2.2229602871967202  | 2.4189051149435437  | 2.347959573862797   | 2.35133793296188    | 2.4459319877362087  | 2.2972841873765497 |
| 2.513499169717872   | 1.317560048642433   | 2.5709312744022856  | NA                  | NA                  | NA                 |
| 37                  | 1.9566972324526781  | 1.3119551740798323  | 1.298297625430073   | 2.586425817762783   | 1.1999931054888926 |
| 2.4474435654321485  | 1.0474516090284403  | 2.2847326358743323  | 0.9559267111521688  | 2.1220217063165165  |                    |
| 0.8508425691460793  | 1.983039453985882   | 0.8576221912109883  | 1.833887768557884   | 0.8881304905030788  | 1.671176839000068  |
| 0.9186387897951692  | 1.583041752156251   | 0.9932146325091682  | 1.3932123343387992  | 0.9966044435416227  |                    |
| 1.1864338613590746  | 0.9830451994118048  | 0.9389776559898962  | 1.0508414200608946  | 0.7016908837180813  |                    |
| 1.1186376407099847  | 0.4135569459594489  | 1.2474504599432557  | 0.21016828401217894 | 1.5084659094422521  |                    |
| 0.09491470890872597 | 1.7186341934544311  | 0.12542300820081648 | 1.942361721596428   | 0.22372752814199695 |                    |
| 2.206766982127879   | 0.14237206336308897 | 2.4406639433672392  | 0.16610074059027047 | 2.6135443060224186  |                    |
| 0.21355809504463344 | 2.766085802482871   | 0.3932180797647219  | 2.8203227790021432  | 0.5423697651927198  |                    |
| 2.84066164519687    | 0.7491482381724444  | 2.857610700359143   | 0.9660961442495323  | 2.857610700359143   | 1.1220274517424391 |
| 2.8338820231319612  | 1.291518003365164   | 2.793204290742507   | 1.3966021453712536  | 2.8338820231319612  |                    |
| 1.5999908073185236  | 2.881339377586324   | 1.840667390622793   | 2.9152374879108693  | 1.9796496429534274  | 2.884729188618779  |
| 2.071174540829699   | 2.779645046612689   | 2.206766982127879   | 2.661001660476782   | 2.3423594234260587  | 2.5254092191786017 |
| 2.4745620536917845  | 2.396596399945331   | 2.620323928087328   | 1.298297625430073   | 2.586425817762783   |                    |
| 37                  | 2.0041828665620436  | 1.3194462402450937  | 1.4778070926697504  | 2.4573235721067443  | 1.3993092563385627 |
| 2.3242185452842956  | 1.3139855211959675  | 2.2423077595474044  | 1.2115970390248532  | 2.085312086885029   |                    |
| 1.1330992026936655  | 1.9829236047139145  | 1.1092085568537389  | 1.883948071948504   | 1.160402797939296   | 1.703061753446202  |
| 1.1911193425906303  | 1.5460660807838267  | 1.215009988430557   | 1.358353863470117   | 1.215009988430557   | 1.2013581908077418 |
| 1.2115970390248532  | 0.9795164794369939  | 1.2559653812990026  | 0.7337841222263195  | 1.3242243694130789  |                    |

|                     |                     |                     |                     |                     |
|---------------------|---------------------|---------------------|---------------------|---------------------|
| 0.4982906132327565  | 1.4709811938583428  | 0.3549467381931964  | 1.66551930998346    | 0.31740429473045445 |
| 1.795211387400205   | 0.3583596875989002  | 1.8873610213542078  | 0.416379827495865   | 1.9795106553082107  |
| 0.4675740685814222  | 2.1501581255934012  | 0.3822503334388269  | 2.3446962417185184  | 0.344707889976085   |
| 2.5494732060607475  | 0.3924891816559383  | 2.6655134858546767  | 0.5017035626384603  | 2.7303595245630494  |
| 0.6621121847065394  | 2.754250170402976   | 0.83275965499173    | 2.774727866837199   | 1.1126215062594427  |
| 2.771314917431495   | 1.2798560271389294  | 2.7474242715915684  | 1.4061351551499703  | 2.7679019680257912  |
| 1.59384737246368    | 2.808857360894237   | 1.7337782980975363  | 2.8463998043569787  | 1.901012818977023   |
| 2.8361609561398673  | 1.9965754023367297  | 2.754250170402976   | 2.081899137479325   | 2.658687587043269   |
| 2.2218300631131815  | 2.515343712003709   | 2.3583480393413336  | 2.4539106227010405  | 2.4675624203238558  |
| 1.4778070926697504  | 2.4573235721067443  | 33                  | 1.823746917353453   | 1.2956672994513885  |
| 1.384321710729429   | 2.4183113914708207  | 1.2924871009267396  | 2.306069090600867   | 1.1700409545231538  |
| 2.1870242260418253  | 1.0884101902540966  | 2.0781832070164157  | 0.9931742986068631  | 1.9795460335246382  |
| 0.9727666075395988  | 1.84689604158742    | 0.9965755804514072  | 1.6632268219820414  | 1.0748050628759203  |
| 1.4217358110194136  | 1.0135819896741274  | 1.0986140357877288  | 1.0271871170523037  | 0.9217473798714381  |
| 1.0475948081195678  | 0.6632499596860901  | 1.108817881321361   | 0.4897845856143436  | 1.2890858190821957  |
| 0.326523057076229   | 1.4795576023766626  | 0.28230639309715627 | 1.6224114398475127  | 0.2959115204753325  |
| 1.775469122851995   | 0.3605358755216695  | 1.9897498790582704  | 0.26189870202989196 | 2.1972280715754575  |
| 0.26189870202989196 | 2.36729216380266    | 0.3401281844544052  | 2.4761331828280695  | 0.4999884311479756  |
| 2.5339549741853187  | 0.7652884150224116  | 2.5815729200089352  | 0.9999768622959512  | 2.567967792630759   |
| 1.2210601821913145  | 2.5747703563198474  | 1.3639140196621649  | 2.6461972750552722  | 1.5475832392675435  |
| 2.690413939034345   | 1.7652652773183628  | 2.6802100935007127  | 1.9217242421673892  | 2.5951780473871113  |
| 2.0577755159491513  | 2.5237511286516865  | 2.163215253130017   | 2.4217126733153647  | 2.2754575539999706  |
| 2.3536870364244837  | 2.3808972911808364  | 1.384321710729429   | 2.4183113914708207  | NA                  |
| NA                  | NA                  | NA                  | NA                  | NA                  |
| 44                  | 1.6225262841462842  | 1.4608884826804063  | 1.0405285185578639  | 2.782651184807838   |
| 0.9557949258414254  | 2.650466780170194   | 0.8337785523297542  | 2.50472500069792    | 0.732098241070028   |
| 2.3691512523516183  | 0.6338072735189595  | 2.2369668477139744  | 0.6338072735189595  | 2.1691799735408237  |
| 0.6575326794795622  | 1.9624300073127139  | 0.6948154602747951  | 1.823466915257755   | 0.7524343033219733  |
| 1.6268849801556178  | 0.776159709282576   | 1.4709751695573712  | 0.7287088973613705  | 1.3048973278331517  |
| 0.7388769284873431  | 1.0981473616050421  | 0.7931064278258637  | 0.9219014887548501  | 0.8134424900778089  |
| 0.7151515225267403  | 0.8541146145816993  | 0.5490736808025211  | 1.0066350814712886  | 0.4168892761648771  |
| 1.1218727675656448  | 0.3931638702042743  | 1.2472784847859737  | 0.4134999324562195  | 1.3828522331322752  |
| 0.46095074437742506 | 1.4845325443920012  | 0.5219589311332608  | 1.5794341682344124  | 0.5863564615977539  |
| 1.7319546351240014  | 0.49484418146400044 | 1.9522619761867415  | 0.4134999324562195  | 2.159011942414851   |
| 0.43044665099950724 | 2.2539135662572622  | 0.4846761503380278  | 2.352204533808331   | 0.593135149015069   |
| 2.409823376855509   | 0.7829383966998911  | 2.4267700953987967  | 0.9354588635894803  | 2.4504955013593994  |
| 2.457274188776714   | 1.2540571722032887  | 2.4403274702334268  | 1.4370817324707958  | 2.409823376855509   |
| 1.5794341682344124  | 2.4030446894381936  | 1.7150079165807137  | 2.443716813942084   | 1.8370242900923852  |
| 2.474220907320002   | 1.918368539100166   | 2.53183975036718    | 2.128507849036933   | 2.5148930318238927  |
| 2.2674709410918923  | 2.4267700953987967  | 2.399655345729536   | 2.342036502682358   | 2.511503688115235   |
| 2.240356191422632   | 2.606405311957646   | 2.172569317249481   | 2.708085623217372   | 2.0912250682417004  |
| 2.7928192159338106  | 1.0405285185578639  | 2.782651184807838   | 40                  | 1.878638181750189   |
| 1.2644658557580883  | 1.3897985686274315  | 2.542314454806277   | 2.386385834911492   | 1.1423466283596204  |
| 2.264354741080791   | 1.0609925658058197  | 2.1253748842180475  | 0.9660794928263853  | 1.9762257695360794  |
| 0.9762487506456103  | 1.8406356652797446  | 1.0203155345289192  | 1.6813172927785511  | 1.0779413288378614  |
| 1.5186091676709494  | 1.0982798444763118  | 1.3559010425633478  | 1.0881105866570866  | 1.1999724226685629  |
| 1.0609925658058197  | 1.064382318412228   | 1.0813310814442698  | 0.8677766672405426  | 1.1355671231468036  |
| 1.183023659636521   | 0.5220219013868889  | 1.2542084643710967  | 0.3898215497369625  | 1.3694600529889813  |
| 0.2915187241511198  | 1.505050157245316   | 0.2881289715447114  | 1.660978777140101   | 0.34575476585365367 |
| 1.7660611079387605  | 0.4203293231946378  | 1.87114343873742    | 0.49151412792921356 | 2.0236823060257967  |
| 0.3966010549497792  | 2.1728314207077646  | 0.3186367450023867  | 2.3694370718794504  | 0.2949084767575281  |
| 2.51519643395501    | 0.36948303409851224 | 2.616889012147261   | 0.4745653648971717  | 2.6711250538497953  |
| 0.62371447957914    | 2.691463569488245   | 0.816930378144417   | 2.7287508481587373  | 1.054213060593003   |
| 2.7185815903395123  | 1.2067519278813794  | 2.68129431166902    | 1.3389522795313058  | 2.708412332502873   |
| 1.55928619894785    | 2.7558688690100044  | 1.8033483866092526  | 2.80671515810613    | 1.983005274748896   |



|                                                    |                     |                     |                     |                     |                     |
|----------------------------------------------------|---------------------|---------------------|---------------------|---------------------|---------------------|
| 2.7592586216164126                                 | 2.091477358153964   | 2.6779045590626116  | 2.227067462410299   | 2.566042723051136   | 2.3321497932089583  |
| 2.5084169287421934                                 | 2.4101141031563507  | 2.440621876614026   | 2.484688660497335   | 1.3897985686274315  | 2.542314454806277   |
| 41                                                 | 1.762498477949425   | 1.264811610523942   | 1.2135314330941962  | 2.688073816881837   | 1.10166959708272    |
| 2.5389247021998687                                 | 0.9762487506456103  | 2.3829960823050835  | 0.8372688937828673  | 2.2474059780487488  |                     |
| 0.752525078622658                                  | 2.105036368579597   | 0.7389660681970245  | 1.9524975012912207  | 0.78981235729315    | 1.7558918501195353  |
| 0.8338791411764589                                 | 1.5558964463414415  | 0.8677766672405426  | 1.41352683687229    | 0.8203201307508254  |                     |
| 1.2643777221903219                                 | 0.8101508729316003  | 1.0948900918699034  | 0.8203201307508254  | 0.9559102350071602  |                     |
| 0.8847254302725844                                 | 0.7423558208034329  | 0.8915049354854011  | 0.5457501696317475  | 0.9152332037302597  |                     |
| 0.40338056016259594                                | 1.0474335553801861  | 0.27118020851266955 | 1.203362175274971   | 0.19321589856527704 |                     |
| 1.4609833733620072                                 | 0.16948763032041847 | 1.633860756288834   | 0.220333919416544   | 1.806738139215661   |                     |
| 0.2982982293639365                                 | 1.9660565117168542  | 0.2101646615973189  | 2.1219851316116394  | 0.1762671355332352  |                     |
| 2.277913751506424                                  | 0.18643639335246032 | 2.4270628661883924  | 0.2576211980870361  | 2.5558734652319104  |                     |
| 0.4237190758010462                                 | 2.579601733476769   | 0.5626989326637893  | 2.623668517360078   | 0.7660840890482915  |                     |
| 2.6846840642754284                                 | 0.9152332037302597  | 2.7016328273074706  | 1.0440438027737777  | 2.6677353012433866  |                     |
| 1.2270904435198298                                 | 2.654176290817753   | 1.3965780738402482  | 2.7016328273074706  | 1.5864042197991168  |                     |
| 2.7660381268292293                                 | 1.789789376183619   | 2.789766395074088   | 1.9863950273553044  | 2.7762073846484547  | 2.105036368579597   |
| 2.6779045590626116                                 | 2.277913751506424   | 2.566042723051136   | 2.4168936083691674  | 2.4609603922524763  | 2.532145196987052   |
| 2.3321497932089583                                 | 2.6677353012433866  | 1.2135314330941962  | 2.688073816881837   |                     |                     |
| 37                                                 | 1.6359557823129252  | 1.311952380952381   | 1.1904761904761905  | 2.6700680272108843  | 1.0578231292517006  |
| 2.5136054421768708                                 | 0.9761904761904762  | 2.4149659863945576  | 0.8401360544217688  | 2.295918367346939   |                     |
| 0.7517006802721088                                 | 2.163265306122449   | 0.6836734693877551  | 2.010204081632653   | 0.7142857142857143  |                     |
| 1.8299319727891157                                 | 0.7551020408163265  | 1.6768707482993197  | 0.7687074829931972  | 1.58843537414966    |                     |
| 0.7789115646258503                                 | 1.3537414965986394  | 0.7414965986394558  | 1.1972789115646258  | 0.7278911564625851  |                     |
| 0.9659863945578231                                 | 0.7551020408163265  | 0.7346938775510204  | 0.7925170068027211  | 0.5                 | 0.9081632653061225  |
| 0.2925170068027211                                 | 1.1462585034013606  | 0.1598639455782313  | 1.336734693877551   | 0.14625850340136054 |                     |
| 1.5238095238095237                                 | 0.17687074829931973 | 1.6938775510204083  | 0.25170068027210885 | 1.870748299319728   |                     |
| 0.16326530612244897                                | 2.0918367346938775  | 0.15306122448979592 | 2.261904761904762   | 0.20408163265306123 |                     |
| 2.4183673469387754                                 | 0.35374149659863946 | 2.489795918367347   | 0.6224489795918368  | 2.554421768707483   |                     |
| 0.7959183673469388                                 | 2.5918367346938775  | 0.9285714285714286  | 2.598639455782313   | 1.0476190476190477  |                     |
| 2.5816326530612246                                 | 1.4081632653061225  | 2.6360544217687076  | 1.6156462585034013  | 2.697278911564626   |                     |
| 1.836734693877551                                  | 2.67687074829932    | 2.068027210884354   | 2.5850340136054424  | 2.248299319727891   | 2.435374149659864   |
| 2.4115646258503403                                 | 2.357142857142857   | 2.510204081632653   | 2.2687074829931975  | 2.608843537414966   | 1.1904761904761905  |
| 2.6700680272108843                                 |                     |                     |                     |                     |                     |
| PRNOTUM monticola rixosus simillimus 25 33 20 (78) |                     |                     |                     |                     |                     |
| 37                                                 | 1.2104727143191123  | 1.4960629758740909  | 0.30636952187370975 | 1.3702461033252733  | 0.40063706706562047 |
| 1.3062788405164767                                 | 0.5521384789811912  | 1.2860786522610674  | 0.6800730045987843  | 1.2355781816225437  |                     |
| 0.8349411145569233                                 | 1.1648775227286108  | 1.0066427147279036  | 1.0605098834089952  | 1.1951778051117248  |                     |
| 0.9763424323447893                                 | 1.4005463857083875  | 0.8921749812805834  | 1.5587811937090947  | 0.8854415851954469  |                     |
| 1.717016001709802                                  | 0.9258419617062658  | 1.8348504331996902  | 0.9898092245150623  | 1.9661516568598516  |                     |
| 1.0874434677495413                                 | 2.080619390307172   | 1.1615108246860424  | 1.9526848646895787  | 1.1480440325157695  |                     |
| 1.8281170371145539                                 | 1.1480440325157695  | 1.7978167547314396  | 1.2423115777076803  | 1.7405828880077796  |                     |
| 1.4173798759212286                                 | 1.760783076263189   | 1.535214307411117   | 1.8079168488591444  | 1.7069159075820972  |                     |
| 1.8651507155828044                                 | 1.8045501508165762  | 1.9964519392429658  | 1.902184394051055   | 1.858417319497668   | 2.016652127498375   |
| 1.6934491154118243                                 | 2.124386464860559   | 1.5217475152408442  | 2.1849870296267873  | 1.3332124248570227  |                     |
| 2.1479533511585367                                 | 1.1177437501326555  | 2.057052504009194   | 0.942675451919107   | 1.9594182607747153  |                     |
| 0.8214743223866503                                 | 1.8920842999233505  | 0.6699729104710795  | 1.8516839234125315  | 0.49827131030009936 |                     |
| 1.8112835469017126                                 | 0.3703367846825063  | 1.7910833586463033  | 0.3164696160014145  | 1.7237493977949385  |                     |
| 0.31310291795884626                                | 1.6328485506455959  | 0.3164696160014145  | 1.5049140250280029  | 0.309736219916278   |                     |
| 1.4173798759212286                                 | 0.30636952187370975 | 1.3702461033252733  |                     |                     |                     |
| 30                                                 | 0.9165402592838505  | 1.5526612326586167  | 0.19528508834396222 | 1.383830539816698   | 0.2996616010795282  |
| 1.3568946655623582                                 | 0.4646438308873584  | 1.3299587913080186  | 0.595956217877264   | 1.2659860899539621  |                     |
| 0.7474705105579244                                 | 1.1683435457819809  | 0.8821498818296225  | 1.1111048129915093  | 1.050499095919245   |                     |
| 1.080801954455377                                  | 1.2053803728816979  | 1.1010038601461318  | 1.346793712716981   | 1.1649765615001884  |                     |

|                    |                     |                     |                     |                     |
|--------------------|---------------------|---------------------|---------------------|---------------------|
| 1.4545372097343394 | 1.2188483100088676  | 1.57911562816066    | 1.2659860899539621  | 1.4478032411707544  |
| 1.3131238698990564 | 1.3703626026895281  | 1.4242343511982072  | 1.340059744153396   | 1.555546738188113   |
| 1.3535276812805657 | 1.696960078023396   | 1.4410692726071694  | 1.8181715121679243  | 1.5690146753152827  |
| 1.892245166367358  | 1.3636286341259432  | 1.9898877105393393  | 1.1952794200363206  | 2.0605943804569806  |
| 1.0909029073007546 | 2.0807962861477356  | 0.8821498818296225  | 2.033658506202641   | 0.7272686048671697  |
| 1.9461169148760373 | 0.6026901864408489  | 1.855208339267641   | 0.5016806579870754  | 1.794602622195377   |
| 0.3670012867153773 | 1.7676667479410373  | 0.20201905690754712 | 1.720528967995943   | 0.18518413549858487 |
| 1.6329873766693392 | 0.20201905690754712 | 1.444436256888962   | 0.19528508834396222 | 1.383830539816698   |
| 31                 | 1.0313319523317113  | 1.7751520318950489  | 0.17229631405324122 | 1.7297198587305787  |
| 1.6385041630553332 | 0.42229488738539517 | 1.5844504174700027  | 0.5912128423395533  | 1.5135048763892562  |
| 0.7364822836001291 | 1.4121541034167615  | 0.9121569567524536  | 1.2432361484626033  | 1.1182368617965264  |
| 1.1689122482827738 | 1.300668253147017   | 1.131750298192859   | 1.5033697990920067  | 1.1283719390937759  |
| 1.672287754046165  |                     |                     |                     |                     |
| 1.1858040437781896 | 1.8412057090003229  | 1.2837764576516013  | 1.6689093949470817  | 1.3243167668405993  |
| 1.5776936992718364 | 1.445937694407593   | 1.5574235446773375  | 1.6587743176498322  | 1.5844504174700027  |
| 1.8513407862975724 | 1.6824228313434144  | 2.0135020230535643  | 1.8682325817929881  | 2.0810692050352273  |
| 1.7837736043159091 | 2.239852082692136   | 1.550666826479171   | 2.395256601249961   | 1.3885055897231793  |
| 2.4189051149435437 |                     |                     |                     |                     |
| 1.172290607381857  | 2.3580946511600467  | 0.9155353158515367  | 2.2736356736829677  | 0.7195904881047134  |
| 2.1891766962058887 | 0.5641859695468879  | 2.1283662324223918  | 0.418916528286312   | 2.1013393596297263  |
| 0.314187396214734  | 2.091204282332477   | 0.2432418551339876  | 2.0743124868370613  | 0.20607990504407284 |
| 1.989853509359982  | 0.18918810954865703 | 1.8243139135049071  | 0.17229631405324122 | 1.7297198587305787  |
| 28                 | 1.2538078787898082  | 1.700713578036241   | 0.3199897604914939  | 1.543950594371458   |
| 0.3959873286082237 |                     |                     |                     |                     |
| 1.471952898260872  | 0.6639787530198499  | 1.423954434187148   | 0.8919714573700392  | 1.311958018015125   |
| 1.0919650576772229 |                     |                     |                     |                     |
| 1.17596236980624   | 1.3639563540949928  | 1.0799654416587918  | 1.5839493144328949  | 1.0839653136649356  |
| 1.7719432987216475 | 1.151963137769378   | 1.935938050973538   | 1.2359604498983952  | 2.0799334431947103  |
| 1.347956866070418  |                     |                     |                     |                     |
| 1.9439377949858254 | 1.411954818168717   | 1.9159386909428198  | 1.5599500823960328  | 1.8919394589059577  |
| 1.7359444506663544 | 1.9159386909428198  | 1.9519375389981128  | 1.9959361310656931  | 2.039934723133274   |
| 2.107932547237716  | 2.0919330592131415  | 1.8199417627953716  | 2.1999296033790205  | 1.5399507223653144  |
| 2.3559246116186237 | 1.2999584019966939  | 2.315925891557187   | 1.0279671055789241  | 2.1919298593667333  |
| 0.8519727373086025 | 2.095932931219285   | 0.6879779850567119  | 2.0279351071148426  | 0.49998400076795924 |
| 1.983936515047262  | 0.355988608546787   | 1.9639371550165439  | 0.3159898884853502  | 1.8439409948322336  |
| 0.3279895045037812 | 1.619948162488188   | 0.3199897604914939  | 1.543950594371458   |                     |
| 31                 | 1.496031746031746   | 1.7783253968253967  | 0.5277777777777778  | 1.5753968253968254  |
| 0.7063492063492064 |                     |                     |                     |                     |
| 1.5119047619047619 | 0.9761904761904762  | 1.4126984126984128  | 1.1388888888888888  | 1.3253968253968254  |
| 1.3293650793650793 | 1.2023809523809523  | 1.507936507936508   | 1.1587301587301588  | 1.7182539682539681  |
| 1.1071428571428572 | 1.8888888888888888  | 1.1150793650793651  | 2.0674603174603177  | 1.2023809523809523  |
| 2.1904761904761907 | 1.2896825396825398  | 2.3333333333333335  | 1.4007936507936507  | 2.1746031746031744  |
| 1.4444444444444444 | 2.1111111111111111  | 1.5753968253968254  | 2.0992063492063493  | 1.7380952380952381  |
| 2.142857142857143  | 2.0198412698412698  | 2.2182539682539684  | 2.1468253968253967  | 2.4047619047619047  |
| 2.1785714285714284 | 2.25                | 2.3253968253968256  | 2.0357142857142856  | 2.4087301587301586  |
| 1.7738095238095237 |                     |                     |                     |                     |
| 2.496031746031746  | 1.496031746031746   | 2.4365079365079363  | 1.2817460317460319  | 2.3611111111111111  |
| 1.0952380952380953 |                     |                     |                     |                     |
| 2.246031746031746  | 0.9484126984126984  | 2.142857142857143   | 0.8055555555555556  | 2.1111111111111111  |
| 0.6150793650793651 |                     |                     |                     |                     |
| 2.0952380952380953 | 0.5238095238095238  | 2.0238095238095237  | 0.5119047619047619  | 1.869047619047619   |
| 0.5119047619047619 | 1.6507936507936507  | 0.5277777777777778  | 1.5753968253968254  |                     |
| 31                 | 1.3471785642146181  | 2.1222004894652113  | 0.4032225284462031  | 1.955629262964085   |
| 0.5362859628334501 |                     |                     |                     |                     |
| 1.9112747848350027 | 0.7137038753497795  | 1.8427269549991483  | 0.9475729418485773  | 1.681437943620667   |
| 1.173377557778451  | 1.5322456080955718  | 1.431439975984021   | 1.423375525415097   | 1.673373493051743   |
| 1.3870854978549387 |                     |                     |                     |                     |
| 1.8709525319903824 | 1.435472201268483   | 2.0644993456445597  | 1.5080522563887997  | 2.201595005316269   |
| 1.6048256632158884 | 2.0040159663776294  | 1.6612768171983567  | 1.9153070101194647  | 1.7903080263011417  |
| 1.8830492078437686 | 2.0322415433688636  | 1.931435911257313   | 2.217723906454117   | 2.052402669791174   |
| 2.358851791410288  |                     |                     |                     |                     |
| 2.294336186858896  | 2.451592972952915   | 2.0886926973513322  | 2.5806241820557     | 1.8749847572748444  |
| 2.713687616442947  |                     |                     |                     |                     |
| 1.7136957458963633 | 2.7741709957098775  | 1.576600086224654   | 2.7580420945720294  | 1.3306343438724704  |
| 2.701590940589561  | 1.1209586290804447  | 2.6249786601847824  | 0.9757985188398115  | 2.5362697039266178  |
| 0.8387028591681025 | 2.471754099375225   | 0.7137038753497795  | 2.451592972952915   | 0.5524148639712982  |

|                     |                     |                     |                     |                     |
|---------------------|---------------------|---------------------|---------------------|---------------------|
| 2.4314318465306046  | 0.41935142958405125 | 2.3991740442549085  | 0.3749969514549689  | 2.2741750604365856  |
| 0.391125852592817   | 2.0322415433688636  | 0.4032225284462031  | 1.955629262964085   |                     |
| 33                  | 1.2275953850984538  | 1.9589276862240506  | 0.3522151745020727  | 1.7772696736368954  |
| 1.7205913696940331  | 0.6113159925265859  | 1.663913065751171   | 0.7692055535102736  | 1.6031863115266756  |
| 0.9878218687184567  | 1.465539001951153   | 1.1173722777307133  | 1.3602792946286943  | 1.3805215460368596  |
| 1.271213388432768   | 1.5546049081470794  | 1.2145350844899057  | 1.7205913696940331  | 1.2307288856164378  |
| 1.906820082649152   | 1.3238432420939972  | 2.084951895041005   | 1.453393651106254   | 1.8865778312409869  |
| 1.5505564578654463  | 1.7894150244817946  | 1.7408336211021982  | 1.7853665742001614  | 1.9634983865920144  |
| 1.8582386792695558  | 2.1416301989838673  | 1.9715952871552804  | 2.2428414560246925  | 2.1213879475757023  |
| 2.315713561094087   | 1.9473045854654822  | 2.4736031220777748  | 1.7610758725103632  | 2.5829112796818663  |
| 1.6396223640613727  | 2.6233957824981964  | 1.485781253359318   | 2.5748143791186     | 1.263116487869502   |
| 2.522184525457371   | 1.076887774914383   | 2.4371670695430776  | 0.9473373659021265  | 2.372391865036949   |
| 0.8137385066082369  | 2.307616660530821   | 0.6760911970327143  | 2.250938356587959   | 0.5586861388653567  |
| 2.2266476548981604  | 0.47366868295106324 | 2.2104538537716283  | 0.3846027767551368  | 2.1821147018001974  |
| 0.34816672422043965 | 2.068758093914473   | 0.32792447281227455 | 1.8541902289879229  | 0.3522151745020727  |
| 1.7772696736368954  | 31                  | 1.344402812878889   | 1.9725624058123894  | 0.48995588817992775 |
| 1.698781481148438   | 0.6787093860853097  | 1.610428780001238   | 0.9919598719708373  | 1.5140440151133834  |
| 1.277098134764074   | 1.365450835911274   | 1.5943646525199289  | 1.2811141666344013  | 1.7791021185549836  |
| 1.2489859116717832  | 1.9517914889790566  | 1.3373386128189833  | 2.10841673192182    | 1.4377394095771652  |
| 2.220865624290984   | 1.5582203656869833  | 2.028096094515275   | 1.5943646525199289  | 1.8835189471834928  |
| 1.7228776723704018  | 1.8473746603505474  | 1.9397433933680748  | 1.8513906922208747  | 2.1726732418470567  |
| 1.9517914889790566  | 2.3453626122711295  | 2.188737369328366   | 2.4176511859370207  | 1.9317113296274202  |
| 2.5180519826952024  | 1.7349257679813836  | 2.61042071571273    | 1.6144448118715653  | 2.614436747583057   |
| 1.4056111546145469  | 2.570260397009457   | 1.1927614654872012  | 2.5019878552138937  | 1.0923606687290193  |
| 2.421667217807348   | 1.0080239994521465  | 2.3333145166601477  | 0.9036071708236373  | 2.2650419748645843  |
| 0.7670620872325099  | 2.2007854649393477  | 0.6024047805490915  | 2.1525930824954203  | 0.4859398563096005  |
| 2.1164487956624747  | 0.4658596969579641  | 2.016047998904293   | 0.46184366508763686 | 1.88753497905382    |
| 0.47790779256894594 | 1.7509898954626928  | 0.48995588817992775 | 1.698781481148438   | 34                  |
| 1.3985729941123979  | 1.9370040793437513  | 0.4759390836956811  | 1.715780394163422   | 0.5639278218579079  |
| 1.6597875607874595  | 0.7079093933960972  | 1.6317911440994781  | 0.8718884054257016  | 1.5837972869200818  |
| 1.0758622984381363  | 1.4598131558733076  | 1.271837215254005   | 1.3158315843351185  | 1.5278044535441193  |
| 1.2198438699763257  | 1.7637742513428183  | 1.1678505246986461  | 1.9237537752741398  | 1.1958469413866273  |
| 2.1437256206797066  | 1.3118320962368355  | 2.3636974660852736  | 1.4358162272836095  | 2.1597235730728386  |
| 1.5038075249544212  | 2.0317399539277816  | 1.611793703608063   | 2.0157420015346497  | 1.843764013308479   |
| 2.0077430253380832  | 2.071734834910612   | 2.071734834910612   | 2.291706680316179   | 2.2477123112350657  |
| 2.3357010493972923  | 2.3516990017904242  | 2.3676969541835566  | 2.175721525465971   | 2.4796826209354816  |
| 1.947750703863838   | 2.5916682876874066  | 1.747762989496861   | 2.6116657281788216  | 1.5358034297406853  |
| 2.5956677757856896  | 1.3038331200402693  | 2.527676478114878   | 1.1838484770917783  | 2.4396877399526513  |
| 1.0838612746347025  | 2.3556984898887077  | 0.9398797030965131  | 2.27970821602133    | 0.7918986434600409  |
| 2.2357138469402162  | 0.6079221909390213  | 2.2157164064488013  | 0.49593652418709633 | 2.18771998976082    |
| 0.46394061940083203 | 2.067735346812329   | 0.4479426670076999  | 1.8877583823895925  | 0.4519421551059829  |
| 1.7837716918342335  | 0.4759390836956811  | 1.715780394163422   | 31                  | 1.7284094680681694  |
| 2.173288377781467   | 0.7148022857352289  | 2.034774604792308   | 0.8507462787278184  | 1.947068802861605   |
| 1.0349284627822946  | 1.9076011919927887  | 1.232266517126376   | 1.8155100999655505  | 1.4734574724358092  |
| 1.648869076297215   | 1.6357132060076096  | 1.5216956634976957  | 1.9251423523789293  | 1.4515310219531334  |
| 2.166333307688362   | 1.4339898615669928  | 2.376827232322049   | 1.4909986328219498  | 2.521541805507709   |
| 1.561163274366512   | 2.6618710885968335  | 1.6400984961041447  | 2.4469918738666117  | 1.6883366871660312  |
| 2.3329743313566977  | 1.8418218405447615  | 2.275965560101741   | 2.131250986916081   | 2.3329743313566977  |
| 2.3636713620324437  | 2.4996153550250333  | 2.521541805507709   | 2.6837975390795092  | 2.6224034777280174  |
| 2.4776889045423576  | 2.7802739212032828  | 2.2978920105844165  | 2.8899061736166614  | 2.1137098265299405  |
| 2.9249884943889426  | 1.8681335811239723  | 2.8635944330374503  | 1.6006308852353284  | 2.7715033410102126  |
| 1.3945222506981765  | 2.666256378693369   | 1.232266517126376   | 2.5741652866661306  | 1.074396073651111   |
| 2.5171565154111737  | 0.9121403400793104  | 2.4864594847354278  | 0.6928758352525531  | 2.4382212936735415  |
| 0.6402523540941314  | 2.3549007818393735  | 0.6534082243837368  | 2.1356362770126163  | 0.7148022857352289  |
| 2.034774604792308   |                     |                     |                     |                     |

|                    |                     |                    |                     |                    |                     |
|--------------------|---------------------|--------------------|---------------------|--------------------|---------------------|
| 30                 | 1.4797990567857895  | 2.2420614172890203 | 0.5695598340534744  | 2.108675721495688  | 0.7130367388150367  |
| 2.0260678066329705 | 0.9521649134176405  | 1.952155461755802  | 1.1565108080780475  | 1.804330772001465  | 1.352161132752905   |
| 1.656506082247128  | 1.6173760173121565  | 1.5608548124060866 | 1.826069696965338   | 1.5043336075000167 | 1.995633311683548   |
| 1.556507027413312  | 2.165196926401758   | 1.6260715872977058 | 2.299978261177771   | 1.7304184271242964 | 2.0608500865751673  |
| 1.8173741269797887 | 1.9217209668063795  | 2.0347633766185194 | 1.939112106777478   | 2.2956304761849964 | 2.0347633766185194  |
| 2.447802950932108  | 2.1695447113945328  | 2.521715295809276  | 2.347803896098292   | 2.5869320707008954 | 2.143458001437885   |
| 2.7478001154335563 | 1.939112106777478   | 2.8695380952312455 | 1.7608529220737188  | 2.860842525245696  | 1.5347681024494388  |
| 2.81736467531795   | 1.3130310678179336  | 2.7478001154335563 | 1.1912930880202444  | 2.6738877705563877 | 1.026077258294809   |
| 2.5956276406864447 | 0.8912959235187959  | 2.5521497907586985 | 0.7391234487716845  | 2.543454220773149  | 0.6130376839812206  |
| 2.526063080802051  | 0.586950974024573   | 2.413020670989911  | 0.5739076190462491  | 2.1999792063439547 | 0.5695598340534744  |
| 2.108675721495688  | 32                  | 1.6217850877192983 | 1.8862587719298245  | 0.6929824561403509 | 1.7280701754385965  |
| 0.8289473684210527 | 1.6578947368421053  | 1.0043859649122806 | 1.5921052631578947  | 1.219298245614035  | 1.4956140350877194  |
| 1.4254385964912282 | 1.337719298245614   | 1.6140350877192982 | 1.2280701754385965  | 1.8640350877192982 | 1.1491228070175439  |
| 2.074561403508772  | 1.162280701754386   | 2.245614035087719  | 1.2412280701754386  | 2.3684210526315788 | 1.3070175438596492  |
| 2.530701754385965  | 1.3859649122807018  | 2.289473684210526  | 1.4473684210526316  | 2.18859649122807   | 1.6359649122807018  |
| 2.162280701754386  | 1.8596491228070176  | 2.241228070175439  | 2.0482456140350878  | 2.3728070175438596 | 2.192982456140351   |
| 2.5789473684210527 | 2.25                | 2.3728070175438596 | 2.4298245614035086  | 2.1096491228070176 | 2.5833333333333335  |
| 1.9429824561403508 | 2.6140350877192984  | 1.7105263157894737 | 2.543859649122807   | 1.4780701754385965 | 2.456140350877193   |
| 1.3333333333333333 | 2.3640350877192984  | 1.1798245614035088 | 2.289473684210526   | 1.0570175438596492 | 2.2280701754385963  |
| 0.9210526315789473 | 2.18859649122807    | 0.8070175438596491 | 2.1798245614035086  | 0.7017543859649122 | 2.1403508771929824  |
| 0.6710526315789473 | 2.008771929824561   | 0.6666666666666666 | 1.8421052631578947  | 0.6929824561403509 | 1.7280701754385965  |
| 32                 | 1.2721479901705748  | 2.311265566198423  | 0.30566519862816854 | 2.1178231619237393 | 0.45413115224756473 |
| 2.039223539419353  | 0.6899300197607233  | 1.964990562609655  | 0.9082623044951295  | 1.7946913805168183 | 1.1571611090923524  |
| 1.6549587182867984 | 1.384226685216135   | 1.5850923871717884 | 1.6200255527292935  | 1.5457925759195954 | 1.8514577745477638  |
| 1.6636920096761747 | 1.9475239798309025  | 1.7466582778752489 | 2.0479568308087295  | 1.8470911288530758 | 1.8121579632955709  |
| 1.855824420242452  | 1.6462254268974221  | 1.9387906884415262 | 1.571992450087724   | 2.1178231619237393 | 1.571992450087724   |
| 2.3143222181847047 | 1.6549587182867984  | 2.5894208969500565 | 1.8077913176008826  | 2.6505539366756903 | 1.9780904996937194  |
| 2.676753810843819  | 2.0523234765034175  | 2.6985870393172595 | 1.921324105662774   | 2.812119827379151  | 1.7684915063486897  |
| 2.925652615441042  | 1.5632591586983478  | 2.99988559225074   | 1.3973266223001992  | 2.964952426693235  | 1.1222279435348474  |
| 2.890719449883537  | 0.9344621786632582  | 2.8033865359897745 | 0.7772629336544857  | 2.6898537479278835 | 0.6855633740660352  |
| 2.6461872909810022 | 0.5108975462785104  | 2.611254125423497  | 0.37553152974317855 | 2.55885437708724   | 0.32313178140692106 |
| 2.4103884234678437 | 0.32313178140692106 | 2.2226226585962543 | 0.30566519862816854 | 2.1178231619237393 | 32                  |
| 1.6864102029935069 | 2.3397896615853875  | 0.6216451269370523 | 2.147501347600726   | 0.7998790444504729 | 2.064905141923775   |
| 1.0476676614813258 | 1.973614598807145   | 1.321539290831216  | 1.8127693561730824  | 1.4563015211462413 | 1.6910486320175757  |
| 1.717131644336613  | 1.5867165827414271  | 2.0040447798460215 | 1.5128147145041553  | 2.221403215837998  | 1.5997580889009457  |
| 2.3996371333514186 | 1.6910486320175757  | 2.616995569343395  | 1.8127693561730824  | 2.4952748451878883 | 1.8605882120913173  |
| 2.3735541210323814 | 1.9866561049666636  | 2.360512614872863  | 2.177931528639603   | 2.3735541210323814 | 2.425720145670456   |
| 2.443108820549814  | 2.6561200878219506  | 2.560482375985481  | 2.7039389437401855  | 2.651772919102111  | 2.7430634622187413  |
| 2.4474559892696535 | 2.8691313550940873  | 2.2300975532776772 | 3.0082407541289524  | 2.0518636357642563 | 3.064753947486866   |
| 1.8431995372119592 | 3.0343237664479896  | 1.5910637514612667 | 2.956074729490878   | 1.3954411590684879 | 2.8691313550940873  |
| 1.256331760033623  | 2.7604521370980994  | 1.0867921799598816 | 2.6648144252616297  | 0.8868224188472634 | 2.6213427380632344  |
| 0.7042413326140032 | 2.6126484006235553  | 0.5520904274196199 | 2.586565388304518   | 0.5260074151005827 | 2.47788617030853    |
| 0.5564375961394594 | 2.221403215837998   | 0.6216451269370523 | 2.147501347600726   | 35                 | 1.5999638995780545  |
| 2.2884590643644316 | 0.6150201657089472  | 2.106112222139992  | 0.7123614869002914  | 2.048592350526925  | 0.8937703127568873  |
| 2.0131955064573455 | 1.0796037441221809  | 1.942401818318186  | 1.2698617809961716  | 1.8140882585659595 | 1.513215083974532   |
| 1.6592270657615482 | 1.800814442039867   | 1.5751595610962965 | 1.9777986623877655  | 1.530913506009322  | 2.1415090662095717  |
| 1.579584166604994  |                     |                    |                     |                    |                     |

|                     |                    |                    |                     |                     |
|---------------------|--------------------|--------------------|---------------------|---------------------|
| 2.3007948645226803  | 1.637104038218061  | 2.3981361857140246 | 1.7255961483920101  | 2.4689298738531837  |
| 1.800814442039867   | 2.376013158170537  | 1.8494851026355392 | 2.2167273598574284  | 1.973374056879068   |
| 2.1238106441747817  | 2.2078781488400336 | 2.35389013062705   | 2.2521242039270084  | 2.5352989564836457  |
| 2.6591879107271748  | 2.5131759289401585 | 2.725569933576367  | 2.3229178920661675  | 2.871568975144653   |
| 2.1459336717182693  | 2.977759507353392  | 1.9556756348442783 | 3.004307140405577   | 1.7388699649181025  |
| 2.9733349018446944  | 1.5397627170267167 | 2.920239635740325  | 1.3539292856614233  | 2.8184737090402834  |
| 1.207917303874407   | 2.721132387848939  | 1.0619053220873909 | 2.6370648831836876  | 0.9424409733525594  |
| 2.6193664611488976  | 0.7964289915655431 | 2.6016680391141076 | 0.6769646428307117  | 2.592818828096713   |
| 0.5973217436741574  | 2.5308743509749485 | 0.584047927148065  | 2.3981361857140246  | 0.5973217436741574  |
| 2.199028937822639   | 0.6150201657089472 | 2.106112222139992  |                     |                     |
| 34                  | 1.6915777581501683 | 2.2727687233472995 | 0.6986832947506343  | 2.135350819581626   |
| 2.0785828018831367  | 0.9475892185055477 | 2.030548325369031  | 1.0960594186400574  | 1.9825138488549248  |
| 1.2183289952214185  | 1.8733445840501382 | 1.4061001306856513 | 1.7336079251000112  | 1.6506392838483734  |
| 1.6069715779264588  | 1.882078125234521  | 1.5371032484513953 | 2.1047834254362856  | 1.5414700190435868  |
| 2.2838210197161355  | 1.6244386602952245 | 2.44539153162722   | 1.6899402191780966  | 2.62442912590707    |
| 2.471592155180369   | 1.8122097957594576 | 2.3493225785990077 | 1.93884614293301    | 2.314388413861476   |
| 2.3274887256380503  | 2.3100216432692844 | 2.3667896609677737 | 2.4934260081413258  | 2.44539153162722    |
| 2.7161313083430905  | 2.6855639141977505 | 2.44539153162722   | 2.8209338025556856  | 2.248886854978604   |
| 2.1309840489894345  | 2.999971396835536  | 1.9170122899720528 | 2.9781375438745785  | 1.6419057426639905  |
| 2.895168902622941   | 1.3798995071325026 | 2.7641657848571968 | 1.2357960775901844  | 2.663730061236793   |
| 1.1135265010088233  | 2.6287958964992613 | 0.969423071466505  | 2.6113288141304953  | 0.8165861007398038  |
| 2.598228502353921   | 0.7074168359350171 | 2.59386173176173   | 0.6943165241584428  | 2.44539153162722    |
| 2.257620396162987   | 0.6986832947506343 | 2.135350819581626  |                     |                     |
| 30                  | 1.2892382149775172 | 1.862816530006903  | 0.3912895545497901  | 1.6651544376952179  |
| 1.6086348353713593  | 0.7608408005134808 | 1.5651582181991603 | 0.9825715480916951  | 1.4260330432481239  |
| 1.2434312511248886  | 1.265169559710988  | 1.4955956307236422 | 1.1956069722354699  | 1.695588069715757   |
| 1.1912593105182498  | 1.891232846990652  | 1.2564742362765482 | 2.056443992245008   | 1.3564704557726057  |
| 2.1607878734582853  | 1.4434236901170034 | 2.021662698507249  | 1.4955956307236422  | 1.9173188172939715  |
| 1.865146876687333   | 1.7912366274945948 | 1.8521038915356731 | 2.008619713355589   | 1.9129711555767517  |
| 2.1999168289132642  | 2.165135535175505  | 2.339042003864301  | 1.9173188172939715  | 2.491210163966997   |
| 2.578163398311395   | 1.543419909613061  | 2.5825110600286147 | 1.2390835894076686  | 2.5086008108358766  |
| 0.9999621949605747  | 2.3607803124504003 | 0.8477940348578785 | 2.2433934460854634  | 0.7217118450585017  |
| 2.1825261820443846  | 0.5869343318246851 | 2.134701903154966  | 0.3869418928325702  | 2.095572947699987   |
| 0.37824656939813045 | 2.0042720516383694 | 0.3869418928325702 | 1.8434085681012333  | 0.38259423111535035 |
| 1.739064686887956   | 0.3912895545497901 | 1.6651544376952179 |                     |                     |
| 29                  | 1.530642866519577  | 2.1217517039515985 | 0.5745392994672338  | 1.8990497455672688  |
| 1.811333821984485   | 0.9999615288437351 | 1.7236178984017014 | 1.254337707233808   | 1.5613434397735513  |
| 1.4692417200116283  | 1.4516985352950715 | 1.7323894907599797 | 1.3815257964288445  | 1.9999230576874703  |
| 1.4034547773245405  | 2.2411418475401255 | 1.508713885623881  | 2.412187898526554   | 1.6183587901023608  |
| 1.6666025480728919  | 2.1402685354199242 | 1.8288770067010418 | 2.1183395545242285  | 2.1139537583450894  |
| 2.1885122933904553  | 2.3595583443768837 | 2.3069287902272135 | 2.4385026756013892  | 2.4692032488553637  |
| 2.521832803005034   | 2.245527643719265  | 2.6577924845583487 | 2.0613242041954187  | 2.7849805737533853  |
| 1.8288770067010418  | 2.8376101279030554 | 1.600815605385804  | 2.754280000499411   | 1.3464394269957312  |
| 1.2017081530841378  | 2.5656907647964258 | 0.9999615288437351 | 2.4911322297510594  | 0.8026007007824716  |
| 2.412187898526554   | 0.6578694268708783 | 2.385873121451719  | 0.5613819109298163  | 2.342015159660327   |
| 2.127111146882507   | 0.5657677071089554 | 1.9779940767917743 | 0.5745392994672338  | 1.8990497455672688  |
| 30                  | 0.9823028488006558 | 1.7552850844029884 | 0.26101095069344443 | 1.5830144671927084  |
| 1.5457271885222164  | 0.5220219013868889 | 1.505050157245316  | 0.6542222530368152  | 1.4372551051171487  |
| 0.8372688937828673  | 1.349121537350531  | 0.9830282558584271 | 1.2711572274031384  | 1.155905638785254   |
| 1.2169211857006046  | 1.2914957430415888 | 1.193192917455746  | 1.41352683687229    | 1.2338699487326465  |
| 1.305054753467222   | 1.7355533344810852 | 1.4101370842658816 | 1.5830144671927084  | 1.505050157245316   |
| 1.5355579307029914  | 1.6474197667144674 | 1.532168178096583  | 1.8677536861310116  | 1.5660657041606667  |
| 2.0508003268770634  | 1.7050455610234099 | 2.1185953790052308 | 1.5355579307029914  | 2.2338469676231156  |

|                     |                     |                    |                     |                     |                     |
|---------------------|---------------------|--------------------|---------------------|---------------------|---------------------|
| 1.386408816021023   | 2.2982522671448744  | 1.220310938307013  | 2.3253702879961415  | 1.0440438027737777  | 2.277913751506424   |
| 0.8338791411764589  | 2.193169936346215   | 0.7050685421329408 | 2.111815873792414   | 0.559309180057381   | 2.0440208216642466  |
| 0.440667838833088   | 2.0033437903873463  | 0.3186367450023867 | 1.9796155221424878  | 0.23728268244858586 |                     |
| 1.9389384908655873  | 0.23728268244858586 | 1.8474151704925612 | 0.2542314454806277  | 1.6541992719272842  |                     |
| 0.26101095069344443 | 1.5830144671927084  |                    |                     |                     |                     |
| 34                  | 1.1815423377475205  | 1.525917474290366  | 0.2508416928742193  | 1.386408816021023   | 0.44744734404590475 |
| 1.2881059904351804  | 0.6711710160688571  | 1.1864134122429293 | 0.844048398995684   | 1.0779413288378614  |                     |
| 1.0033667714968773  | 0.9830282558584271  | 1.2304801961262382 | 0.8881151828789928  | 1.3897985686274315  |                     |
| 0.8576074094213174  | 1.5457271885222164  | 0.8745561724533593 | 1.688096797991368   | 0.9423512245815266  |                     |
| 1.8338561600669279  | 0.9931975136776522  | 1.9287692330463622 | 1.0576028131994113  | 1.8304664074605195  |                     |
| 1.0813310814442698  | 1.7016558084170015  | 1.1762441544237041 | 1.660978777140101   | 1.3931883212338398  |                     |
| 1.698266055810593   | 1.5762349619798917  | 1.7863996235772106 | 1.7728406131515773  | 1.9219897278335454  |                     |
| 1.844025417886153   | 2.0338515638450216  | 1.8880922017694617 | 1.89148195437587    | 1.9897847799617128  | 1.7084353136298183  |
| 2.0779183477283305  | 1.5762349619798917  | 2.1626621628885396 | 1.4101370842658816  | 2.1728314207077646  |                     |
| 1.2270904435198298  | 2.128764636824456   | 0.999977018890469  | 2.0508003268770634  | 0.7932021098995584  | 1.955887253897629   |
| 0.6677812634624488  | 1.8880922017694617  | 0.5457501696317475 | 1.8372459126733363  | 0.440667838833088   |                     |
| 1.8135176444284775  | 0.3254162502152035  | 1.8101278918220693 | 0.2508416928742193  | 1.7084353136298183  |                     |
| 0.2508416928742193  | 1.5219989202773578  | 0.2542314454806277 | 1.4440346103299653  | 0.2508416928742193  |                     |
| 1.386408816021023   |                     |                    |                     |                     |                     |
| 34                  | 1.5901640480453076  | 1.962074169777005  | 0.6212259773108001  | 1.7104989238283674  | 0.79142487520417    |
| 1.6424193646710195  | 1.0254483598075537  | 1.5743398055136717 | 1.2296870372795976  | 1.4722204667776497  |                     |
| 1.425415769856973   | 1.289256651542277   | 1.6211445024343483 | 1.2296870372795976  | 1.8338931248010606  | 1.204157202595592   |
| 2.067916609404444   | 1.1913922852535894  | 2.2296055624031457 | 1.2637268168582716  | 2.370019653165176   |                     |
| 1.3701011280416278  | 2.5529834684005484  | 1.5020052739089893 | 2.3657646807178416  | 1.5403000259349977  |                     |
| 2.2934301491131595  | 1.6722041718023593  | 2.2551353970871513 | 1.9317574910897484  | 2.2934301491131595  |                     |
| 2.144506113456461   | 2.348744790928505   | 2.314705011349831  | 2.5700033581898856  | 2.4338442398751896  | 2.4338442398751896  |
| 2.506178771479872   | 2.1913108103771375  | 2.650847834689236  | 2.03387682982577    | 2.7104174489519157  | 1.8806978217217374  |
| 2.718927393846584   | 1.6253994748816825  | 2.6551028071365703 | 1.4041409076203017  | 2.54447352350588    | 1.27223676175294    |
| 2.438099212322524   | 1.1488425607802468  | 2.3572547358231732 | 1.0084284700182167  | 2.2764102593238222  |                     |
| 0.859504434361518   | 2.238115507297814   | 0.7318552609414906 | 2.2083307001664747  | 0.6297359222054686  | 2.182800865482469   |
| 0.5786762528374577  | 2.0849364991937813  | 0.5871861977321262 | 1.940267435984417   | 0.6042060875214632  |                     |
| 1.787088427880384   | 0.6212259773108001  | 1.7104989238283674 |                     |                     |                     |
| 29                  | 1.6877153401995624  | 1.967353764465619  | 0.7372285730650582  | 1.8134128119071546  | 0.9024694601313643  |
| 1.741384732929534   | 1.0973689679531613  | 1.6651197081297004 | 1.2965054215971712  | 1.55072217092995    | 1.4744571461301164  |
| 1.4066660129747086  | 1.762569462040599   | 1.330400988174875  | 1.9744167531512478  | 1.2965054215971712  | 2.156605423506406   |
| 1.360059608930366   | 2.3472679855059897  | 1.4447985253746256 | 2.482850251816805   | 1.5125896585300331  |                     |
| 2.2625290690617303  | 1.5803807916854409  | 2.2540551774173045 | 1.7837541911516637  | 2.2794768523505824  |                     |
| 1.9828906447956738  | 2.300661581461647   | 2.156605423506406  | 2.4023482811947585  | 2.2582921232395172  |                     |
| 2.4997980351056572  | 2.300661581461647   | 2.338794093861564  | 2.453191631061314   | 2.139657640217554   | 2.5803000057277035  |
| 1.9617059156846088  | 2.6226694639498334  | 1.699015274707404  | 2.5718261140832777  | 1.4829310377745424  |                     |
| 2.465902468527953   | 1.330400988174875   | 2.3769266062614807 | 1.169397046930782   | 2.309135473106073   | 0.9956822682200498  |
| 2.2540551774173045  | 0.775361085464975   | 2.2159226650173873 | 0.7287546814206323  | 2.131183748573128   |                     |
| 0.7160438439539933  | 1.9532320240401828  | 0.7372285730650582 | 1.8134128119071546  |                     |                     |
| 38                  | 1.3205762046627285  | 1.8459557104860693 | 0.43951326440144506 | 1.7177643417023145  | 0.5384037488917702  |
| 1.6554999625787763  | 0.666595117675525   | 1.6188738572119894 | 0.7947864864592799  | 1.5968981939919171  |                     |
| 0.9046648025596411  | 1.534633814868379   | 1.0475066134901108 | 1.4357433303780538  | 1.1976736454939378  | 1.33319023535105    |
| 1.4027798355479455  | 1.2562754140807972  | 1.5456216464784152 | 1.1903484244205804  | 1.6701504047254911  |                     |
| 1.1720353717371867  | 1.8056669945826034  | 1.2159866981773313 | 1.9521714160497519  | 1.2855762983742267  |                     |
| 2.0803627848335067  | 1.358828509107801   | 2.186578490397189  | 1.44673116198809    | 2.040074068930041   | 1.508995541111628   |
| 1.9924601319532176  | 1.6261990782853468  | 1.9741470792698241 | 1.7543904470691016  | 1.9558340265864305  |                     |
| 1.9045574790729285  | 1.9924601319532176  | 2.047399290003398  | 2.065712342686792   | 2.2048915430805827  |                     |
| 2.2085541536172615  | 2.24151764844737    | 2.0217610162466473 | 2.3587211856210883  | 1.875256594779499   | 2.4722621122581283  |
| 1.7214269522389931  | 2.527201270308309   | 1.4796946568181983 | 2.486912554404843   | 1.2892389089109055  |                     |

|                     |                     |                    |                     |                    |                     |
|---------------------|---------------------|--------------------|---------------------|--------------------|---------------------|
| 2.4356360068913414  | 1.120758824223685   | 2.351395964547731  | 0.9962300659766088  | 2.274481143277478  | 0.8643760866561753  |
| 2.2085541536172615  | 0.7654856021658502  | 2.179253269323832  | 0.6519446755288102  | 2.1572776061037593 |                     |
| 0.5310785278184128  | 2.153614995567081   | 0.4724767592315534 | 2.1206515007369724  | 0.4468384854748025 |                     |
| 2.0180984057099685  | 0.4175376011813728  | 1.8422930999493905 | 0.4248628222547302  | 1.761715668142459  |                     |
| 0.43951326440144506 | 1.7177643417023145  |                    |                     |                    |                     |
| 34                  | 1.5084724368943148  | 2.163103562257776  | 0.57543351667798    | 1.9589226099675918 | 0.6774607359471255  |
| 1.8936251896353387  | 0.8366231980069923  | 1.860976479469212  | 1.0365965477745174  | 1.8038412366784908 |                     |
| 1.2284077200005106  | 1.6569220409309213  | 1.4447054248510989 | 1.530408289037181   | 1.6569220409309213 |                     |
| 1.4569486911633964  | 1.8895441008645728  | 1.4079756259142067 | 2.040544385382908   | 1.4324621585388015 |                     |
| 2.2527610014627304  | 1.554894821661776   | 2.4527343512302555 | 1.6936518398678138  | 2.260923179004262  |                     |
| 1.7548681714293008  | 2.134409427110522   | 1.8977062784061045 | 2.105841805715161   | 2.0976796281736294 |                     |
| 2.1180850720274584  | 2.2445988239211987  | 2.1711392260474143 | 2.436409996147192   | 2.313977333024218  |                     |
| 2.5588426592701667  | 2.4976263277086796  | 2.599653546977825  | 2.265004267775028   | 2.7139240325592677 |                     |
| 2.1017607169443955  | 2.8241134293699446  | 1.9221928110306994 | 2.8771675833899004  | 1.6528409521601555 |                     |
| 2.8241134293699446  | 1.4079756259142067  | 2.754734920266926  | 1.3018673178742954  | 2.660869878539312  | 1.15086703335596    |
| 2.5833291918947614  | 1.0243532814622198  | 2.5139506827917426 | 0.8529475530900555  | 2.460896528771787  |                     |
| 0.6611363808640622  | 2.416004552293363   | 0.5631902503656826 | 2.3792747533564707  | 0.555028072824151  |                     |
| 2.2568420902334965  | 0.5591091615949169  | 2.093598539402864  | 0.5591091615949169  | 2.020138941529079  | 0.57543351667798    |
| 1.9589226099675918  |                     |                    |                     |                    |                     |
| 36                  | 1.5447750833453782  | 2.2177029003171893 | 0.580907862249601   | 2.0746709366057177 | 0.6680440415870411  |
| 2.008281466634335   | 0.800822981529807   | 1.9792360735218548 | 0.9750953402046874  | 1.904547919804049  | 1.1286209895135104  |
| 1.7966650311005516  | 1.3443867669205052  | 1.6472887236649398 | 1.5601525443274997  | 1.551853860581077  |                     |
| 1.829859766086243   | 1.5020617581025397  | 2.0124308085075464 | 1.5726005699471342  | 2.1535084321967353 |                     |
| 1.6348406980453056  | 2.2738393465198667  | 1.6638860911577857 | 2.4356636795751125  | 1.7551716123684373 |                     |
| 2.2530926371538094  | 1.771768979861283   | 2.1535084321967353 | 1.8589051591987231  | 2.1576577740699463 |                     |
| 2.0124308085075464  | 2.174255141562792   | 2.2323459277877524 | 2.211599218421695   | 2.4066182864626326 | 2.331930132744827   |
| 2.51450117516613    | 2.4356636795751125  | 2.57259196139109   | 2.323631448998404   | 2.6265334057428387 | 2.1576577740699463  |
| 2.726117610699913   | 2.0248788341271804  | 2.8132537900373533 | 1.8713531848183573  | 2.875493918135525  |                     |
| 1.7095288517631115  | 2.8630458925158906  | 1.514509783722174  | 2.8049551062909304  | 1.3111920319348136 |                     |
| 2.7219682688267017  | 1.1410690151331448  | 2.6182347219964157 | 1.0165887589368017  | 2.57259196139109   |                     |
| 0.8589137677547671  | 2.5103518332929187  | 0.7427321953048469 | 2.4979038076732842  | 0.6182519391085038 |                     |
| 2.48545578205365    | 0.580907862249601   | 2.3900209189697867 | 0.580907862249601   | 2.290436714012712  | 0.5892065459960238  |
| 2.1452097484503123  | 0.580907862249601   | 2.0746709366057177 |                     |                    |                     |
| 38                  | 1.2280766283524904  | 1.7757547892720307 | 0.40229885057471265 | 1.6590038314176245 | 0.46360153256704983 |
| 1.5977011494252873  | 0.6053639846743295  | 1.578544061302682  | 0.7164750957854407  | 1.5555555555555556 |                     |
| 0.8352490421455939  | 1.4980842911877394  | 0.9310344827586207 | 1.4137931034482758  | 1.0804597701149425 |                     |
| 1.3295019157088122  | 1.206896551724138   | 1.2911877394636015 | 1.3409961685823755  | 1.260536398467433  |                     |
| 1.5057471264367817  | 1.2452107279693487  | 1.6513409961685823 | 1.2490421455938698  | 1.7969348659003832 |                     |
| 1.3026819923371646  | 1.9080459770114941  | 1.3639846743295019 | 1.996168582375479   | 1.4521072796934866 |                     |
| 1.9003831417624522  | 1.5057471264367817  | 1.793103448275862  | 1.5632183908045978  | 1.739463601532567  |                     |
| 1.6666666666666667  | 1.7241379310344827  | 1.8314176245210727 | 1.7547892720306513  | 1.9540229885057472 |                     |
| 1.8199233716475096  | 2.0613026819923372  | 1.9080459770114941 | 2.103448275862069   | 1.9770114942528736 |                     |
| 2.1302681992337167  | 1.8620689655172413  | 2.2222222222222223 | 1.7088122605363985  | 2.310344827586207  |                     |
| 1.5172413793103448  | 2.3333333333333335  | 1.3256704980842913 | 2.314176245210728   | 1.160919540229885  |                     |
| 2.2835249042145596  | 0.9846743295019157  | 2.206896551724138  | 0.89272030651341    | 2.1455938697318007 | 0.7854406130268199  |
| 2.057471264367816   | 0.6819923371647509  | 2.0114942528735633 | 0.5517241379310345  | 1.9846743295019158 |                     |
| 0.46360153256704983 | 1.9808429118773947  | 0.4099616858237548 | 1.9195402298850575  | 0.4061302681992337 |                     |
| 1.8314176245210727  | 0.40229885057471265 | 1.7126436781609196 | 0.40229885057471265 | 1.6590038314176245 |                     |
| 37                  | 1.2304155671596406  | 1.6190752899871903 | 0.38619771241093    | 1.5068607171747894 | 0.5275736607042169  |
| 1.462034196984235   | 0.6861905783015632  | 1.4034149013504331 | 0.8206701388732263  | 1.3172100548301362 |                     |
| 0.9241159546975825  | 1.2379015960314632  | 1.0792846784341168 | 1.1654895249544137  | 1.241349789892275  |                     |
| 1.1241111986246712  | 1.3896221259071857  | 1.1068702293206119 | 1.5516872373653436  | 1.0965256477381762 |                     |
| 1.71030415496269    | 1.1516967495111663  | 1.8275427462302938 | 1.2241088205882156  | 1.9206439804722144 | 1.293072697804453   |

|                     |                     |                     |                     |                     |                    |
|---------------------|---------------------|---------------------|---------------------|---------------------|--------------------|
| 1.793060807622175   | 1.293072697804453   | 1.7172005426843138  | 1.348243799577443   | 1.6999595733802544  | 1.458586003123423  |
| 1.6930631856586307  | 1.5896173698342744  | 1.7172005426843138  | 1.6999595733802544  | 1.7447860935708088  |                    |
| 1.8103017769262344  | 1.789612613761363   | 1.8585764909776006  | 1.8585764909776006  | 1.8689210725600363  |                    |
| 1.9137475927505907  | 1.8861620418640956  | 1.8413355216735412  | 1.9551259190803332  | 1.7240969304059375  |                    |
| 2.0551235410438773  | 1.5551354312261556  | 2.1206392243993033  | 1.3861739320463737  | 2.1137428366776794  |                    |
| 1.1965232697017205  | 2.0861572857911845  | 1.024113576661127   | 2.04133076560063    | 0.8758412406462163  | 1.9689186945235806 |
| 0.7758436186826718  | 1.9171957866114024  | 0.66205322127588    | 1.872369266420848   | 0.5448146300082762  | 1.8413355216735412 |
| 0.4068868755758012  | 1.82064635850867    | 0.3620603553852469  | 1.7413378997099969  | 0.3620603553852469  |                    |
| 1.6516848593288882  | 0.3551639676636231  | 1.5792727882518387  | 0.38619771241093    | 1.5068607171747894  |                    |
| 33                  | 1.2731254355400696  | 1.68798606271777    | 0.4738675958188153  | 1.6062717770034842  | 0.5679442508710801 |
| 1.5679442508710801  | 0.6655052264808362  | 1.5261324041811846  | 0.8153310104529616  | 1.4599303135888502  |                    |
| 0.926829268292683   | 1.3379790940766552  | 1.1010452961672474  | 1.2369337979094077  | 1.2752613240418118  |                    |
| 1.1951219512195121  | 1.4634146341463414  | 1.1742160278745644  | 1.6620209059233448  | 1.1846689895470384  |                    |
| 1.7944250871080138  | 1.2473867595818815  | 1.9477351916376306  | 1.3379790940766552  | 1.818815331010453   |                    |
| 1.3205574912891986  | 1.7560975609756098  | 1.4320557491289199  | 1.7560975609756098  | 1.5609756097560976  |                    |
| 1.7700348432055748  | 1.6794425087108014  | 1.8083623693379791  | 1.7735191637630663  | 1.8571428571428572  |                    |
| 1.8397212543554007  | 1.9442508710801394  | 1.8815331010452963  | 1.9094076655052266  | 1.9581881533101044  |                    |
| 1.8222996515679442  | 2.0696864111498257  | 1.6655052264808363  | 2.156794425087108   | 1.5365853658536586  |                    |
| 2.1742160278745644  | 1.32404181184669    | 2.153310104529617   | 1.1533101045296168  | 2.1045296167247387  | 0.9895470383275261 |
| 2.0418118466898956  | 0.9128919860627178  | 2.010452961672474   | 0.759581881533101   | 1.9581881533101044  |                    |
| 0.6167247386759582  | 1.9268292682926829  | 0.4912891986062718  | 1.9128919860627178  | 0.445993031358885   |                    |
| 1.8222996515679442  | 0.4355400696864111  | 1.67595818815331    | 0.4738675958188153  | 1.6062717770034842  |                    |
| 34                  | 0.9713995748913622  | 1.785495907561026   | 0.16148819152548652 | 1.693908051533295   | 0.2542580036784256 |
| 1.6629847808156486  | 0.3916947624235205  | 1.62175375319212    | 0.5669266298235165  | 1.5221121031019262  |                    |
| 0.7387225782548852  | 1.3778035064195766  | 0.9517495543097823  | 1.2850336942666374  | 1.1819561252078163  |                    |
| 1.2506745045803638  | 1.3468802357019303  | 1.2472385856117363  | 1.5083684272274167  | 1.3090851270470292  |                    |
| 1.6148819152548652  | 1.3606239115764396  | 1.7076517274078042  | 1.408726777137223   | 1.583958644537219   | 1.419034534043105  |
| 1.49118883238428    | 1.4946247513529072  | 1.4637014806352608  | 1.6526770239097663  | 1.4877529134156524  | 1.786677863686234  |
| 1.5221121031019262  | 1.9309864603685836  | 1.5873945635058462  | 1.989397082835249   | 1.7007798894705497  |                    |
| 2.0203203535528953  | 1.6354974290666295  | 2.1337056795175986  | 1.5186761841332987  | 2.2333473296077924  |                    |
| 1.3400083977646755  | 2.312373465886222   | 1.1475969355215425  | 2.284886114137203   | 0.9276981215293907  |                    |
| 2.2436550865136744  | 0.7799536058784137  | 2.1886803830156367  | 0.6390809281646913  | 2.1165260846744616  |                    |
| 0.515387845294106   | 2.0684232191136784  | 0.377951086549011   | 2.0306281104587773  | 0.27487351749018984 |                    |
| 2.0203203535528953  | 0.20615513811764238 | 2.0065766776783858  | 0.1649241104941139  | 1.9241146224313288  |                    |
| 0.1511804346196044  | 1.796985620592116   | 0.14430859668234966 | 1.742010917094078   | 0.16148819152548652 |                    |
| 1.693908051533295   |                     |                     |                     |                     |                    |
| 35                  | 1.2833854101757867  | 1.6943807523434378  | 0.4913828230186955  | 1.5944169921725504  | 0.5979063720647064 |
| 1.5566183134788047  | 0.7319198692516233  | 1.5119471477498323  | 0.821262200709568   | 1.481020956091313   |                    |
| 0.9484032108612584  | 1.3744974070453022  | 1.130524117294761   | 1.278282588552131   | 1.3298262413163298  |                    |
| 1.2164302052350924  | 1.5153833912674457  | 1.1889402570941863  | 1.680323080112882   | 1.2095577181998658  |                    |
| 1.7937191161941193  | 1.2679738579992912  | 1.883061447652064   | 1.3332624848339432  | 1.9620950485571689  |                    |
| 1.3813698940805286  | 1.845262768958318   | 1.3882423811157552  | 1.7627929245356     | 1.4363497903623408  | 1.7387392199123073 |
| 1.5737995310668709  | 1.7559204375003734  | 1.6940680541833348  | 1.776537898606053   | 1.7937191161941193  |                    |
| 1.8383902819230915  | 1.8761889606168374  | 1.9517863180043291  | 1.924296369863423   | 1.8933701782049037  |                    |
| 2.0102024578037545  | 1.7937191161941193  | 2.1064172762969253  | 1.6768868365952687  | 2.178578390166804   |                    |
| 1.560054556996418   | 2.2026320947900966  | 1.4054235987038215  | 2.1682696596139643  | 1.2267389357879321  |                    |
| 2.1304709809202182  | 1.0514905163896562  | 2.0686185976031797  | 0.8968595580970596  | 1.9964574837333013  |                    |
| 0.7594098173925294  | 1.9311688568986496  | 0.632268807240839   | 1.91055139579297    | 0.5051277970891486  | 1.8933701782049037 |
| 0.46732911839540275 | 1.8383902819230915  | 0.46389287487778946 | 1.7456117069475336  | 0.46389287487778946 |                    |
| 1.6528331319719758  | 0.4913828230186955  | 1.5944169921725504  |                     |                     |                    |
| 33                  | 1.2150842869776493  | 1.8740342367342149  | 0.4346262618780033  | 1.7879747033355256  | 0.5052971987687355 |
| 1.7385050475120132  | 0.6395719788611267  | 1.72083731328933    | 0.8021151337098109  | 1.6749012043103542  |                    |
| 0.9717253822475683  | 1.565361252129719   | 1.1236678965626425  | 1.4770225810163038  | 1.2968116919449366  |                    |



|                     |                     |                     |                     |                     |
|---------------------|---------------------|---------------------|---------------------|---------------------|
| 1.420485831503718   | 1.5052909557725966  | 1.3816168162138152  | 1.6430992827095245  | 1.4134187378146448  |
| 1.7455721412010863  | 1.4734890341717672  | 1.830377265469965   | 1.5370928773734263  | 1.893981108671624   |
| 1.5865625331969389  | 1.8162430780918186  | 1.6254315484868416  | 1.7385050475120132  | 1.703169579066647   |
| 1.7314379538229399  | 1.8056424375582087  | 1.7314379538229399  | 1.9540514050287463  | 1.766773422268306   |
| 2.102460372499284   | 1.8727798276044043  | 2.1519300283227967  | 1.9469843113396732  | 2.1660642157009433  |
| 1.8162430780918186  | 2.2614699805034317  | 1.646632829554061   | 2.3639428389949932  | 1.4275529251927912  |
| 2.395744760595823   | 1.1236678965626425  | 2.3427415579277735  | 0.929322820113129   | 2.233201605747139   |
| 0.7879809463316645  | 2.1589971220118698  | 0.6572397130838098  | 2.120128106721967   | 0.5512333077477115  |
| 2.102460372499284   | 0.45582754294522293 | 2.084792638276601   | 0.4240256213443934  | 2.0070546076967957  |
| 0.42755916818893    | 1.9010482023606972  | 0.4240256213443934  | 1.8374443591590381  | 0.4346262618780033  |
| 1.7879747033355256  | 36                  | 1.1942088683497374  | 1.7848799955908525  | 0.44063746121599967 |
| 1.7083175419451064  | 0.4982592830673227  | 1.6744223526207986  | 0.5863867753105226  | 1.6473062011613526  |
| 0.6711247486212918  | 1.626969087566768   | 0.813484543783384   | 1.5727367846478757  | 0.9117805928238762  |
| 1.043971831188676   | 1.3829237244317527  | 1.2405639292696606  | 1.3015752700534144  | 1.4337665084182143  |
| 1.2575115239318144  | 1.6235795686343373  | 1.2812381564588298  | 1.742212731269414   | 1.3320809404452914  |
| 1.8371192613774756  | 1.3727551676344605  | 1.9116886778909523  | 1.4337665084182143  | 1.7625498448639987  |
| 1.4710512166749528  | 1.7015385040802449  | 1.5829053414451681  | 1.6947594662153833  | 1.7184860987423987  |
| 1.7218756176748296  | 1.8472878181747678  | 1.772718401661291   | 1.9557524240125523  | 1.8506773371071985  |
| 1.9998161701341524  | 1.9150781968233832  | 2.0404903973233215  | 1.8269507045801832  | 2.1286178895665215  |
| 1.6913699472829526  | 2.2303034575394447  | 1.5862948603775988  | 2.2743672036610443  | 1.454103622012799   |
| 2.2743672036610443  | 1.2846276753912607  | 2.250640571134029   | 1.0948146151751377  | 2.20996634394486    |
| 0.9083910738914455  | 2.125228370634091   | 0.7694207976617841  | 2.0540484730530446  | 0.6168924457023995  |
| 2.0269323215935984  | 0.47453265054030735 | 2.0099847269314446  | 0.4338584233511381  | 1.962531461877414   |
| 0.4270793854862766  | 1.8981306021612294  | 0.4338584233511381  | 1.8133926288504603  | 0.4270793854862766  |
| 1.7489917691342756  | 0.44063746121599967 | 1.7083175419451064  | 34                  | 1.0391669891048794  |
| 1.6555260577381674  | 0.3435195312409962  | 1.5475384823232998  | 0.3775313660173325  | 1.5135266475469635  |
| 1.4318982440837564  | 0.7414579981241305  | 1.3298627397547478  | 0.9659361076479498  | 1.1972165841270364  |
| 1.1666059328283338  | 1.1393964650072648  | 1.336665106710015   | 1.1257917310967303  | 1.482915996248261   |
| 1.1427976484848983  | 1.6087597849207051  | 1.2108213180375709  | 1.7312023901155156  | 1.3060544554113123  |
| 1.5373349318903988  | 1.3298627397547478  | 1.4761136292929937  | 1.4352994275613902  | 1.4591077119048255  |
| 1.5815503170996361  | 1.4897183632035282  | 1.7141964727273475  | 1.527131381457498   | 1.8162319770563562  |
| 1.591753867532537   | 1.863848545743227   | 1.727801206637882   | 1.9046627474748306  | 1.6325680692641404  |
| 1.999895884848572   | 1.5135266475469635  | 2.0815242883117793  | 1.3876828588745194  | 2.118937306565749   |
| 1.2312284189033726  | 2.1121349396104816  | 1.0713727954545922  | 2.0849254717894126  | 0.9149183554834454  |
| 2.037308903102542   | 0.7822721998557339  | 1.9692852335498694  | 0.6802366955267252  | 1.9046627474748306  |
| 0.5782011911977164  | 1.880854463131395   | 0.445555035570005   | 1.863848545743227   | 0.363926632106798   |
| 1.8400402613997917  | 0.3299147973304617  | 1.6563763536075757  | 0.32311243037519444 | 1.5883526840549034  |
| 0.3435195312409962  | 1.5475384823232998  | 36                  | 1.1336397381311234  | 1.4879418486190032  |
| 0.34456313482417306 | 1.4323016584847976  | 0.3884780441645088  | 1.3985209589922318  | 0.48982014264220675 |
| 1.361362189550409   | 0.6215648706632141  | 1.3343376299563563  | 0.756687668633478   | 1.2498858812249414  |
| 0.9120788862992816  | 1.1417876428487304  | 1.0472016842695455  | 1.0674701039650851  | 1.2127271117831189  |
| 1.0134209847769795  | 1.3681183294489223  | 0.9965306350306965  | 1.5268876170639825  | 1.010042914827723   |
| 1.665388484983503   | 1.0640920340158284  | 1.749840233714918   | 1.1113850133054208  | 1.8275358425478196  |
| 1.1755683423412961  | 1.732949883968635   | 1.2059709718846057  | 1.6518762051864766  | 1.2600200910727113  |
| 1.6248516455924238  | 1.3681183294489223  | 1.6113393657953974  | 1.4863507776729032  | 1.665388484983503   |
| 1.6282297155416805  | 1.7261937440701218  | 1.716059534222352   | 1.8646946119896424  | 1.7971332130045103  |
| 1.7464621637656614  | 1.908609521329978   | 1.5572902466072918  | 2.026841969553959   | 1.3681183294489223  |
| 2.0403542493509854  | 1.16205606254427    | 2.009951619807676   | 0.9762622153351569  | 1.942390220822544   |
| 0.8276271375678667  | 1.851182332192616   | 0.7161508292423988  | 1.7937551430552539  | 0.6046745209169311  |
| 1.766730583461201   | 0.49319821259146335 | 1.7464621637656614  | 0.4087464638600484  | 1.7363279539178915  |
| 0.34794120477342966 | 1.699169184476069   | 0.33780699492565985 | 1.614717435744654   | 0.33105085502714665 |
| 1.48972884762216    | 0.34456313482417306 | 1.4323016584847976  |                     |                     |

|                     |                     |                     |                     |                     |                     |
|---------------------|---------------------|---------------------|---------------------|---------------------|---------------------|
| 36                  | 0.9358282828282828  | 1.7650033670033671  | 0.2727272727272727  | 1.7003367003367003  | 0.3400673400673401  |
| 1.6498316498316499  | 0.43097643097643096 | 1.6195286195286196  | 0.5218855218855218  | 1.5622895622895623  |                     |
| 0.6363636363636364  | 1.4612794612794613  | 0.7979797979797978  | 1.3602693602693603  | 0.9797979797979798  |                     |
| 1.3063973063973064  | 1.1582491582491583  | 1.2693602693602695  | 1.3198653198653199  | 1.2727272727272727  |                     |
| 1.4242424242424243  | 1.3232323232323233  | 1.5353535353535352  | 1.4040404040404040  | 1.5824915824915824  |                     |
| 1.4444444444444444  | 1.4848484848484849  | 1.4444444444444444  | 1.3905723905723906  | 1.4545454545454546  |                     |
| 1.2794612794612794  | 1.5791245791245792  | 1.2491582491582491  | 1.7205387205387206  | 1.2727272727272727  |                     |
| 1.7979797979797978  | 1.32996632996633    | 1.936026936026936   | 1.4579124579124578  | 1.9898989898989898  | 1.5622895622895623  |
| 2.0202020202020203  | 1.5084175084175084  | 2.1313131313131315  | 1.3771043771043772  | 2.2222222222222223  |                     |
| 1.2188552188552189  | 2.265993265993266   | 1.0740740740740742  | 2.249158249158249   | 0.8888888888888888  | 2.218855218855219   |
| 0.7441077441077442  | 2.1717171717171717  | 0.622895622895623   | 2.0841750841750843  | 0.5420875420875421  |                     |
| 2.0336700336700337  | 0.4377104377104377  | 1.9966329966329965  | 0.3367003367003367  | 1.9865319865319866  |                     |
| 0.26936026936026936 | 1.9461279461279462  | 0.25925925925925924 | 1.8754208754208754  | 0.25252525252525254 |                     |
| 1.7811447811447811  | 0.25925925925925924 | 1.7306397306397305  | 0.2727272727272727  | 1.7003367003367003  |                     |
| 32                  | 1.1931696710660533  | 1.7835199569780307  | 0.43536407610163863 | 1.6836345130493056  | 0.4999884311479756  |
| 1.636016567225689   | 0.6258358593961055  | 1.6122075943138805  | 0.8027025153123962  | 1.5407806755784554  |                     |
| 0.9319512254050701  | 1.4523473476203101  | 1.0577986536532     | 1.3911242744185173  | 1.2346653095694908  | 1.3435063285949005  |
| 1.4081306836412375  | 1.312894791994004   | 1.5339781118893674  | 1.2958883827712837  | 1.6700293856711295  |                     |
| 1.319697355683092   | 1.7788704046965391  | 1.3639140196621649  | 1.9863485972137263  | 1.499965293443927   |                     |
| 1.8162845049865237  | 1.5271755482002793  | 1.7448575862510987  | 1.6326152853811449  | 1.7176473314947462  |                     |
| 1.7958768139192594  | 1.7516601499401867  | 1.9387306513901095  | 1.8026793776083474  | 2.0543742341046074  |                     |
| 1.962539624301918   | 2.1189985891509444  | 1.8298896323646998  | 2.234642171865442   | 1.642819130914777   | 2.3196742179790433  |
| 1.4081306836412375  | 2.309470372445411   | 1.1972512092795062  | 2.2720562721554267  | 1.0033781441404952  |                     |
| 2.1938267897309136  | 0.8673268703587332  | 2.1189985891509444  | 0.7312755965769712  | 2.0271639793482548  |                     |
| 0.6088294501733853  | 1.9999537245919023  | 0.4727781763916232  | 1.9965524427473584  | 0.43536407610163863 |                     |
| 1.9455332150791975  | 0.4149563850343743  | 1.8366921960537879  | 0.4217589487234624  | 1.7312524588729223  |                     |
| 0.43536407610163863 | 1.6836345130493056  |                     |                     |                     |                     |
| 33                  | 1.0065806458101767  | 1.5923895241417874  | 0.2457280638050171  | 1.4334137055292666  | 0.3208116388565501  |
| 1.3992848077785698  | 0.43002411165877996 | 1.375394579353082   | 0.5426494742360795  | 1.3446785713774547  |                     |
| 0.6689263959136577  | 1.266182106550852   | 0.8361579948920721  | 1.170621192848901   | 1.0272798222959743  |                     |
| 1.1126020666727163  | 1.2252274292500158  | 1.0716473893718803  | 1.3992848077785698  | 1.064821609821741   |                     |
| 1.5119101703558693  | 1.1023633973475073  | 1.6347742022583778  | 1.1945114212743888  | 1.7508124546107469  |                     |
| 1.3037238940766187  | 1.600645304507681   | 1.320788342951967   | 1.4982586112555905  | 1.4026976975536394  | 1.460716823729824   |
| 1.5767550760821931  | 1.4777812726051724  | 1.7439866750606077  | 1.580167965857263   | 1.890740935388604   |                     |
| 1.7303351159603289  | 1.921456943364231   | 1.6620773204589352  | 2.0067791877409733  | 1.5119101703558693  |                     |
| 2.0989272116678546  | 1.3378527918273153  | 2.136468999193621   | 1.191098531499319   | 2.115991660543203   | 1.040931381396253   |
| 2.0852756525675757  | 0.8634611130926296  | 2.0340823059415305  | 0.6791650652388668  | 1.921456943364231   |                     |
| 0.5528881435612886  | 1.836134698987489   | 0.42661122188371026 | 1.7883542421365135  | 0.3071600797562714  |                     |
| 1.771289793261165   | 0.24231517402994743 | 1.7405737852855379  | 0.21842494560445966 | 1.6484257613586566  |                     |
| 0.22866361492966872 | 1.4846070521553119  | 0.2457280638050171  | 1.4334137055292666  |                     |                     |
| 32                  | 1.0888253352215325  | 1.7785924379711933  | 0.24065584420258443 | 1.7320441744721218  | 0.30844622285119977 |
| 1.6778118715532295  | 0.41352130975655355 | 1.6506957200937833  | 0.5253754345267688  | 1.6066319739721835  |                     |
| 0.6779037864861533  | 1.5015568870668297  | 0.8406006952428301  | 1.365976129769599   | 1.0982041341075683  |                     |
| 1.2541220049993838  | 1.2710695996615375  | 1.233784891404799   | 1.454103622012799   | 1.233784891404799   | 1.643916682228922   |
| 1.2744591185939682  | 1.7489917691342756  | 1.3151333457831376  | 1.8676249317693525  | 1.379534205499322   |                     |
| 1.7388232123369833  | 1.3998713190939067  | 1.6032424550397526  | 1.5117254438641219  | 1.5659577467830141  |                     |
| 1.6812013904856602  | 1.6303586064991988  | 1.8405087803099063  | 1.711707060877537   | 1.9930371322692908  |                     |
| 1.860845893904491   | 2.050658954120614   | 1.8066135909855987  | 2.16590259782326    | 1.6540852390262142  | 2.2777567225934754  |
| 1.494777849201968   | 2.348936620174521   | 1.308354307918276   | 2.34215758230966    | 1.0575299069183992  | 2.2845357604583367  |
| 0.8439902141752609  | 2.1964082682151367  | 0.6745142675537226  | 2.125228370634091   | 0.5287649534591996  |                     |
| 2.0709960677151984  | 0.34912045004036896 | 2.07777510558006    | 0.27116151459446136 | 2.0404903973233215  |                     |
| 0.2440453631350152  | 1.9150781968233832  | 0.23048728740529215 | 1.8100031099180294  | 0.24065584420258443 |                     |
| 1.7320441744721218  |                     |                     |                     |                     |                     |

|                     |                     |                     |                     |                     |                     |
|---------------------|---------------------|---------------------|---------------------|---------------------|---------------------|
| 35                  | 0.974895400973587   | 1.6340809866772334  | 0.1811917315822805  | 1.5770391452531822  | 0.2583659876265852  |
| 1.5300635111392575  | 0.39593748753165    | 1.483087877025333   | 0.563707609367095   | 1.4025582185443195  | 0.7079899141455775  |
| 1.2884745356962168  | 0.8623384262341869  | 1.2113002796519123  | 1.0468855602531764  | 1.1643246455379876  |                     |
| 1.224721889398748   | 1.1307706211708988  | 1.3958474136709016  | 1.1676800479746967  | 1.513286498955713   | 1.21801108452533    |
| 1.5938161574367267  | 1.2683421210759636  | 1.6508579988607779  | 1.3086069503164703  | 1.5703283403797643  |                     |
| 1.3253839625000148  | 1.4763770721519152  | 1.3455163771202683  | 1.415979828291155   | 1.4965094867721687  |                     |
| 1.385781206360775   | 1.6307255842405246  | 1.4226906331645728  | 1.7246768524683738  | 1.4629554624050796  |                     |
| 1.8320497304430585  | 1.5636175355063466  | 1.8689591572468562  | 1.6709904134810314  | 1.915934791360781   |                     |
| 1.5736837428164734  | 1.9998198522785033  | 1.382425803924066   | 2.113903535126606   | 1.2213664869620389  | 2.147457559493695   |
| 1.0334639505063408  | 2.1239697424367328  | 0.8388506091772245  | 2.076994108322808   | 0.6744358897784886  |                     |
| 1.9863982425316677  | 0.5804846215506394  | 1.909223986487363   | 0.47311174357595465 | 1.8924469743038186  |                     |
| 0.3154078290506364  | 1.8689591572468562  | 0.21139035351266058 | 1.8555375475000206  | 0.164414719398736   |                     |
| 1.7716524865822982  | 0.1711255242721538  | 1.677701218354449   | 0.1677701218354449  | 1.610593169620271   |                     |
| 0.1811917315822805  | 1.5770391452531822  |                     |                     |                     |                     |
| 29                  | 1.1668740768166075  | 1.677314771968097   | 0.41210337238923267 | 1.5909892491420377  | 0.537085542704      |
| 1.5470765947071194  | 0.6823350919887295  | 1.4896523542922264  | 0.8444741237484277  | 1.378181769957434   |                     |
| 1.0437700169530566  | 1.2565774961376603  | 1.2396880136626918  | 1.2059090487127546  | 1.4052049419173835  |                     |
| 1.1991532557227673  | 1.563966077182088   | 1.2126648417027421  | 1.715971419456805   | 1.259955392632654   | 1.8443314862665658  |
| 1.3714259769674464  | 1.7463724879117484  | 1.378181769957434   | 1.6484134895569307  | 1.4727628718172578  |                     |
| 1.6484134895569307  | 1.6078787316170062  | 1.6619250755369055  | 1.7497503844067421  | 1.7092156264668175  |                     |
| 1.878110451216503   | 1.878110451216503   | 1.9355346916313962  | 1.7328609019317736  | 2.0706505514311444  |                     |
| 1.5335650087271446  | 2.171987446280956   | 1.3545364944924778  | 2.171987446280956   | 1.1484848082978616  |                     |
| 2.1517200673109937  | 0.9627005010732075  | 2.087540033906113   | 0.8174509517884779  | 2.006470518026264   |                     |
| 0.6620677130187672  | 1.9355346916313962  | 0.5303297497140126  | 1.915267312661434   | 0.40534757939924526 |                     |
| 1.8814883477114968  | 0.3817023039342893  | 1.7227272124467923  | 0.39521388991426415 | 1.6382798000719496  |                     |
| 0.41210337238923267 | 1.5909892491420377  |                     |                     |                     |                     |
| 32                  | 1.0143744883439063  | 1.8335188000928284  | 0.3435294662989492  | 1.7346537407174665  | 0.46597561270253507 |
| 1.6938383585829377  | 0.5986256046397531  | 1.5815960577129842  | 0.785696106089676   | 1.4319396565530458  |                     |
| 0.9829704530732309  | 1.3537101741285327  | 1.1598371089895216  | 1.3230986375276361  | 1.3367037649058124  |                     |
| 1.306092228304916   | 1.4897614479102947  | 1.3537101741285327  | 1.6156088761584246  | 1.4625511931539423  |                     |
| 1.646220412759321   | 1.5033665752884708  | 1.4591499113093982  | 1.510169138977559   | 1.3435063285949005  |                     |
| 1.6054050306247925  | 1.2720794098594754  | 1.772067841007451   | 1.3264999193721803  | 1.9013165511001249  |                     |
| 1.4047294017966934  | 2.0067562882809904  | 1.5169717026666472  | 2.047571670415519   | 1.6768319493602175  |                     |
| 2.0577755159491513  | 1.6224114398475127  | 2.166616534974561   | 1.4829588842212065  | 2.2890626813781467  |                     |
| 1.2618755643258432  | 2.3332793453572194  | 1.0850089084095524  | 2.3026678087563233  | 0.8979384069596297  |                     |
| 2.2618524266217945  | 0.7414794421106032  | 2.2074319171090897  | 0.653046114152458   | 2.1428075620627527  |                     |
| 0.5510076588161363  | 2.0679793614827835  | 0.41155510318983024 | 2.044170388570975   | 0.3367269026098611  |                     |
| 2.0271639793482548  | 0.31291792969805277 | 1.9217242421673892  | 0.3163192115425968  | 1.8230870686756118  |                     |
| 0.3333256207653171  | 1.772067841007451   | 0.3435294662989492  | 1.7346537407174665  |                     |                     |
| 35                  | 1.1079085571674259  | 1.700568394167502   | 0.32312738253477746 | 1.5986302083299517  | 0.3605421320914359  |
| 1.5374060726917833  | 0.45237833554868845 | 1.5101953457414863  | 0.5578199024810895  | 1.4863859596599762  |                     |
| 0.6938735372325747  | 1.425161824021808   | 0.8469338763279957  | 1.323121597958194   | 1.0544156693240108  |                     |
| 1.2516934397136643  | 1.2244827127633673  | 1.2074760084194316  | 1.3707403701212137  | 1.1972719858130703  |                     |
| 1.5135966866102732  | 1.2346867353697286  | 1.6224395944114616  | 1.3027135527454712  | 1.68366373004963    | 1.374141710990001   |
| 1.7482892065565854  | 1.425161824021808   | 1.65985434396812    | 1.4387671874969565  | 1.5680181405108675  | 1.4829846187911893  |
| 1.5203993683478476  | 1.5850248448548032  | 1.4999913231351247  | 1.7210784796062883  | 1.530603390954209   |                     |
| 1.8299213874074765  | 1.581623503986016   | 1.9285602726023034  | 1.6700583665744815  | 1.9863830673716847  |                     |
| 1.765295910900521   | 2.020396476059556   | 1.6190382535426744  | 2.1156340203855954  | 1.452372550972105   | 2.1972662012364865  |
| 1.3027135527454712  | 2.221075587317997   | 1.1632585771251989  | 2.1870621786301254  | 1.010198238029778   | 2.153048769942254   |
| 0.8605392398031442  | 2.09862731604166    | 0.7482949911331689  | 2.0340018395347044  | 0.6292480607256192  |                     |
| 1.9557709995526005  | 0.5238064937932182  | 1.918356249995942   | 0.3673448138290102  | 1.894546863914432   |                     |
| 0.3163247007972032  | 1.789105296982031   | 0.31972604166599033 | 1.687065070918417   | 0.32312738253477746 |                     |
| 1.5986302083299517  |                     |                     |                     |                     |                     |

|                     |                     |                     |                     |                     |                     |
|---------------------|---------------------|---------------------|---------------------|---------------------|---------------------|
| 31                  | 1.0785566767504524  | 1.6416456886784092  | 0.31291792969805277 | 1.6088063124693366  | 0.3673384392107576  |
| 1.5645896484902637  | 0.47617945823616725 | 1.5271755482002793  | 0.6054281683288412  | 1.455748629464854   |                     |
| 0.7516832876442354  | 1.3503088922839885  | 0.9217473798714381  | 1.2414678732585789  | 1.0646012173422883  |                     |
| 1.1904486455904182  | 1.2380665914140347  | 1.1598371089895216  | 1.3945255562630612  | 1.1496332634558895  |                     |
| 1.5407806755784554  | 1.18364608190133    | 1.707443485961114   | 1.2618755643258432  | 1.8060806594528915  | 1.312894791994004   |
| 1.584997339557528   | 1.3673153015067088  | 1.5271755482002793  | 1.4863601660657506  | 1.5271755482002793  |                     |
| 1.6054050306247925  | 1.5611883666457198  | 1.7312524588729223  | 1.6224114398475127  | 1.8230870686756118  |                     |
| 1.768666559162907   | 1.8877114237219488  | 1.6904370767383938  | 2.023762697503711   | 1.5169717026666472  |                     |
| 2.1258011528400322  | 1.3537101741285327  | 2.156412689440929   | 1.1768435182122419  | 2.1428075620627527  |                     |
| 0.9217473798714381  | 2.0781832070164157  | 0.7618871331778676  | 1.9965524427473584  | 0.6190332957070174  |                     |
| 1.9319280877010214  | 0.49658714930343156 | 1.8945139874110368  | 0.3401281844544052  | 1.8843101418774046  |                     |
| 0.3095166478535087  | 1.7958768139192594  | 0.31291792969805277 | 1.6700293856711295  | 0.31291792969805277 |                     |
| 1.6088063124693366  |                     |                     |                     |                     |                     |
| 36                  | 1.0712307898356184  | 1.5673821500649718  | 0.23467215870241281 | 1.510064325563352   | 0.29589098271173786 |
| 1.4624496846672101  | 0.39792235606061305 | 1.4352413184408435  | 0.523761049857559   | 1.3978298148795893  |                     |
| 0.6700060183242801  | 1.3094026246438975  | 0.7856415747863386  | 1.2073712512950223  | 0.9658970010360179  |                     |
| 1.1189440610593306  | 1.1461524272856973  | 1.0781315117197805  | 1.319605761978785   | 1.0509231454934138  |                     |
| 1.4964601424501687  | 1.0577252370500057  | 1.612095698912227   | 1.1189440610593306  | 1.7277312553742856  |                     |
| 1.197168113960135   | 1.7889500793836106  | 1.2447827548562767  | 1.6801166144781439  | 1.261787983747756   |                     |
| 1.5610800122377895  | 1.3060015788656016  | 1.5270695544548312  | 1.4012308606578852  | 1.486257005115281   |                     |
| 1.5202674628982396  | 1.489658050893577   | 1.595090470020748   | 1.530470600233127   | 1.7073249807045106  | 1.5814862869075645  |
| 1.7787469420487232  | 1.6869187060347355  | 1.8399657660580482  | 1.782147987827019   | 1.8535699491712316  |                     |
| 1.6597103398083688  | 1.989611780303065   | 1.4726528220020978  | 2.0882421078736444  | 1.2855953041958268  |                     |
| 2.0916431536519404  | 1.091735694832964   | 2.071236878982165   | 0.9182823601398762  | 2.030424329642615   | 0.7516311170033801  |
| 1.9590023682984026  | 0.5917819654234757  | 1.8807783153975983  | 0.4353338596218672  | 1.843366811836344   |                     |
| 0.2788857538202587  | 1.843366811836344   | 0.22106797558922944 | 1.7753458962704274  | 0.20406274669775026 |                     |
| 1.676715568699848   | 0.22106797558922944 | 1.5882883784641562  | 0.23467215870241281 | 1.510064325563352   |                     |
| 31                  | 1.1120713569479561  | 1.5918695077707765  | 0.2754958616883237  | 1.4761136292929937  | 0.3945372834055006  |
| 1.4489041614719247  | 0.5441893564213801  | 1.4046887762626876  | 0.7210508972583287  | 1.2890485380231442  |                     |
| 0.8741041537518419  | 1.1836118502165018  | 1.0679716119769584  | 1.108785813708562   | 1.2754438041126097  |                     |
| 1.064570428499325   | 1.4489041614719247  | 1.0611692450216912  | 1.5815503170996361  | 1.1053846302309285  |                     |
| 1.7312023901155156  | 1.1972165841270364  | 1.8332378944445245  | 1.2516355197691744  | 1.6971905553391793  |                     |
| 1.2754438041126097  | 1.5883526840549034  | 1.3672757580087176  | 1.544137298845666   | 1.5067242805916963  |                     |
| 1.5645443997114679  | 1.6155621518759724  | 1.6053586014430714  | 1.7380047570707828  | 1.6801846379510113  |                     |
| 1.8298367109668907  | 1.8298367109668907  | 1.8944591970419296  | 1.6869870049062785  | 2.0475124535354428  |                     |
| 1.4795148127706272  | 2.152949141342085   | 1.3230603727994805  | 2.156350324819719   | 1.081576345887493   | 2.098530205699947   |
| 0.89111007114001    | 2.0407100865801757  | 0.7244520807359623  | 1.9488781326840676  | 0.5782011911977164  |                     |
| 1.8876568300866623  | 0.3979384668831342  | 1.8536449953103262  | 0.32311243037519444 | 1.836639077922158   |                     |
| 0.25168757734488834 | 1.755010674458951   | 0.25508876082252196 | 1.5679455831891016  | 0.2754958616883237  |                     |
| 1.4761136292929937  |                     |                     |                     |                     |                     |
| 35                  | 1.0690161413027652  | 1.4448610158341848  | 0.30134159059344656 | 1.3663101664407407  | 0.3732526519850645  |
| 1.301247775626101   | 0.4931044209710944  | 1.280701760022148   | 0.5958345086734057  | 1.2635800787384295  |                     |
| 0.7362322951998979  | 1.1574256547793744  | 0.87663008172639    | 1.0375738857933445  | 1.0273008770231133  |                     |
| 0.9827845056854451  | 1.1950933536035553  | 0.9553898156314954  | 1.3491884851570222  | 0.9314194618342895  |                     |
| 1.4998592804537454  | 0.9519654793747517  | 1.612862376926288   | 1.0101791957393949  | 1.7087437921151118  |                     |
| 1.0820902571310127  | 1.7840791897634736  | 1.160849991036118   | 1.6573787482639561  | 1.1711229998063493  |                     |
| 1.5443756517914138  | 1.222488043657505   | 1.4553429091160772  | 1.3457641489002785  | 1.4484942366025897  |                     |
| 1.4621915816295648  | 1.482737599170027   | 1.5991650318993131  | 1.564921669331876   | 1.7155924646285994  |                     |
| 1.6676517570341873  | 1.7635331722230112  | 1.7601088359662675  | 1.7977765347904484  | 1.636832730723494   |                     |
| 1.9279013125467093  | 1.4279482190621275  | 2.003236710195071   | 1.2293367161709923  | 1.9963880376815837  |                     |
| 1.0273008770231133  | 1.9621446751141465  | 0.8321137103887218  | 1.8799606049522974  | 0.6677455700650237  |                     |
| 1.7601088359662675  | 0.6129561899571243  | 1.7053194558583682  | 0.4965287572278381  | 1.6916221108313934  |                     |
| 0.3698283157283208  | 1.6779247658044185  | 0.2773712367962406  | 1.612862376926288   | 0.284219909309728   |                     |

|                     |                     |                     |                     |                     |
|---------------------|---------------------|---------------------|---------------------|---------------------|
| 1.4964349441970017  | 0.2807955730529843  | 1.4074022015216652  | 0.30134159059344656 | 1.3663101664407407  |
| 30                  | 1.0560481698067448  | 1.5134285927937654  | 0.25423582743408746 | 1.420330822598435   |
| 1.3694836571116176  | 0.46101430041381186 | 1.3389753578195271  | 0.6406742851339003  | 1.271179137170437   |
| 0.8033852146917163  | 1.1660949951643478  | 0.9796553883793503  | 1.0779599083205307  | 1.1762644282617112  |
| 1.0406719869635312  | 1.3762632791765266  | 1.0305025538661676  | 1.5389742087343425  | 1.0949089634828033  |
| 1.6813462720974315  | 1.1762644282617112  | 1.752532303778976   | 1.2237217827160742  | 1.644058350740432   |
| 1.2508402709757103  | 1.5796519411237966  | 1.3254161136897091  | 1.5559232638966152  | 1.45422893292298    |
| 1.5559232638966152  | 1.5864315631887056  | 1.5932111852536146  | 1.7288036265517945  | 1.7491424927465216  |
| 1.806769280298248   | 1.596600996286069   | 1.901683989206974   | 1.4372798777607076  | 1.9864292650183364  |
| 1.2372810268458923  | 2.010157942245518   | 1.0610108531582583  | 1.989819076050791   | 0.9084693566978057  |
| 1.9321922884990645  | 0.7627074823022623  | 1.8711756899148835  | 0.6271150410040823  | 1.772871169973703   |
| 0.49491241073835684 | 1.7254138155193401  | 0.29491355982354145 | 1.6982953272597041  | 0.25423582743408746 |
| 1.6203296735132506  | 0.25084601640163295 | 1.5050760984097975  | 0.25423582743408746 | 1.420330822598435   |
| 34                  | 1.1125790921383587  | 1.7487054988015371  | 0.2534231714297454  | 1.6609491641003584  |
| 0.2979434583025385  | 1.613004239775812   | 0.44520286872793113 | 1.5753332278065255  | 0.5856130042498171  |
| 1.5239636660302258  | 0.7842419764515094  | 1.3801288930565865  | 0.9554738490391752  | 1.2910883193110003  |
| 1.126705721626841   | 1.232869482631194   | 1.33218396873204    | 1.2054723830171674  | 1.506840478771459   |
| 1.2088970204689207  | 1.2842390444074936  | 1.7945100247187378  | 1.3493071559908065  | 1.8698520486573107  |
| 1.4041013552188597  | 1.787660749815231   | 1.4349230922846394  | 1.7123187258766581  | 1.4862926540609394  |
| 1.688346263714385   | 1.6198535146793185  | 1.6951955386178916  | 1.7739622000082178  | 1.7088940884249049  |
| 1.9109476980783504  | 1.7602636502012046  | 1.9760158096616636  | 1.9212216104336104  | 2.0547824710519897  |
| 1.7499897378459446  | 2.157521594604589   | 1.5513607656442523  | 2.2671099930606955  | 1.3938274428635997  |
| 2.3013563675782285  | 1.212321657920674   | 2.284233180319462   | 1.0273912355259949  | 2.2362882559949155  |
| 0.8424608131313158  | 2.1506723197010826  | 0.736297052126963   | 2.092453483021276   | 0.595886916605077   |
| 2.02396073398621    | 1.9897143594686768  | 0.34931302007883824 | 1.9691665347581568  | 0.2739709961402653  |
| 1.938344797692377   | 0.2499985339779921  | 1.828756399236271   | 0.24657389652623876 | 1.732866550587178   |
| 0.2534231714297454  | 1.6609491641003584  | 31                  | 1.121342750340161   | 1.5443851928790728  |
| 0.309736219916278   | 1.3702461033252733  | 0.5184714985555088  | 1.3500459150698638  | 0.6969064948116255  |
| 1.296178746388772   | 0.8955416793231517  | 1.1648775227286108  | 1.1042769579623823  | 1.0672432794941318  |
| 1.2928120483462038  | 1.0436763931961541  | 1.49144723285773    | 1.0504097892812907  | 1.6530487389010053  |
| 1.1177437501326555  | 1.7641497743057573  | 1.1918111070691566  | 1.8920842999233505  | 1.2759785581333627  |
| 1.7405828880077796  | 1.3062788405164767  | 1.6900824173692561  | 1.3837128954955462  | 1.6968158134543925  |
| 1.5150141191557076  | 1.7001825114969606  | 1.646315342815869   | 1.733849491922643   | 1.7708831703908938  |
| 1.8685174136253726  | 1.8550506214550997  | 1.7001825114969606  | 1.9526848646895787  | 1.5453144015388218  |
| 2.043585711838921   | 1.3534126131124322  | 2.073885994222035   | 1.097543561877246   | 2.023385523583512   |
| 0.9224752636636975  | 0.8181076243440821  | 1.8685174136253726  | 0.7002731928541938  | 1.7944500566888715  |
| 0.5757053652791689  | 1.7405828880077796  | 0.43093734944873463 | 1.717016001709802   | 0.32993640817168746 |
| 1.6833490212841196  | 0.309736219916278   | 1.6025482682624819  | 0.3164696160014145  | 1.508280723070571   |
| 0.309736219916278   | 33                  | 1.1213289849020498  | 1.6676615077055346  | 0.34144476126386447 |
| 1.5504379465553029  | 1.5086283839515644  | 0.5156512721127748  | 1.4772712119987605  | 0.6201751786221211  |
| 1.4389457796120002  | 0.7874134290370751  | 1.3622949148384795  | 1.0138818931406588  | 1.2159614457253949  |
| 1.1915725342065473  | 1.1636994924707218  | 1.3762314357063925  | 1.1427947111688526  | 1.5852792487250849  |
| 1.1532471018197872  | 1.756001629357017   | 1.2264138363763295  | 1.9232398797719712  | 1.3065488313668283  |
| 1.7455492387060825  | 1.3448742637535887  | 1.6793507645834966  | 1.421525128527109   | 1.6305729415458017  |
| 1.567858597640194   | 1.6479935926306928  | 1.7246444574042132  | 1.703739676102344   | 1.8674937963003198  |
| 1.7978111919607558  | 1.919755749554993   | 1.9232398797719712  | 1.9476287912908186  | 1.7803905408758647  |
| 2.0626050884510994  | 1.5817951185081067  | 2.1601607345264893  | 1.4006203472252399  | 2.1636448647434676  |
| 1.1776360133386345  | 2.1253194323567075  | 0.9894929816218113  | 2.0800257395359907  | 0.8536119031596612  |
| 2.0103431351964263  | 0.752572126867293   | 1.9406605308568623  | 0.6585006110088815  | 1.902335098470102   |
| 0.5365560534146442  | 0.4215797562543632  | 1.8640096660833416  | 0.34841302169782085 | 1.8256842336965813  |
| 0.31008758931106056 | 1.7350968480551479  | 0.317055849745017   | 1.616636420677889   | 0.34144476126386447 |
| 1.5504379465553029  | 33                  | 1.1551704214731677  | 1.5955318093096014  | 0.5033016754404919  |
| 1.5443777438173996  | 0.57224711043234    |                     |                     |                     |

|                     |                     |                     |                     |                     |
|---------------------|---------------------|---------------------|---------------------|---------------------|
| 1.4926686675735135  | 0.67221799117052    | 1.4581959500775894  | 0.7618470566599226  | 1.4237232325816653  |
| 0.8376870351509557  | 1.385803243336149   | 0.9479997311379127  | 1.2720432755995992  | 1.110021503368756   |
| 1.1927560253589737  | 1.2720432755995992  | 1.151388764363865   | 1.437512319580035   | 1.1238105903671256  |
| 1.589192276562101   | 1.589192276562101   | 1.151388764363865   | 1.7167413312970201  | 1.2306760146044904  |
| 1.151388764363865   | 1.7167413312970201  | 1.2306760146044904  | 1.7891340380384608  | 1.3065159930955235  |
| 1.6719267985523187  | 1.3168578083443006  | 1.5443777438173996  | 1.3651196128385943  | 1.4754323088255514  |
| 1.489221395823921   | 1.471985037075959   | 1.63055953755721    | 1.5374832003182148  | 1.7546613205425368  |
| 1.6374540810563947  | 1.8373958425327546  | 1.8029231250368305  | 1.858079473030309   | 1.7581085922921291  |
| 1.9546030820188964  | 1.589192276562101   | 2.058021234506669   | 1.4168286890824804  | 2.0890466802530003  |
| 1.1893087536093814  | 2.033890332259522   | 1.010050622630576   | 1.9787339842660434  | 0.8859488396452494  |
| 1.9028940057750103  | 0.7997670459054391  | 1.8477376577815317  | 0.7032434369168516  | 1.8098176685360152  |
| 0.5998252844290793  | 1.7787922227896835  | 0.5205380341884539  | 1.7546613205425368  | 0.4860653166925298  |
| 1.6857158855506884  | 0.49985440369089945 | 1.5822977330629162  | 0.5033016754404919  | 1.5443777438173996  |
| 37                  | 1.0112390553325967  | 1.680655712071299   | 0.24738616574117084 | 1.6011382393803557  |
| 0.29892495027058147 | 1.5702149686627094  | 0.3951306813921479  | 1.5530353738195726  | 0.4947723314823417  |
| 1.511804346196044   | 0.6493886850705735  | 1.4293422909489872  | 0.8040050386588052  | 1.3090851270470292  |
| 0.9448777163725276  | 1.2300589907685995  | 1.113237745835269   | 1.188827963145071   | 1.271290018392128   |
| 1.1682124493333068  | 1.3778035064195766  | 1.171648368301934   | 1.5461635358823178  | 1.2472385856117363  |
| 1.6732925377215306  | 1.3090851270470292  | 1.7248313222509413  | 1.3434443167333028  | 1.649241104941139   |
| 1.3709316684823218  | 1.5324198600078083  | 1.3881112633254586  | 1.501496589290162   | 1.4740092375411429  |
| 1.4705733185725156  | 1.62175375319212    | 1.75231867399996    | 1.5530353738195726  | 1.8725758379019182  |
| 1.6286255911293748  | 1.9241146224313288  | 1.7488827550313328  | 1.9756534069607394  | 1.632061510098002   |
| 2.089038732925443   | 1.4671373996038883  | 2.1989881399215188  | 1.298777370141147   | 2.2230395727019103  |
| 1.0823144751176226  | 2.1818085450783817  | 0.9036466887489991  | 2.1440134364234806  | 0.7662099300039041  |
| 2.0684232191136784  | 0.6596964419764556  | 2.0065766776783858  | 0.5634907108548891  | 1.9653456500548574  |
| 0.4672849797333227  | 1.9516019741803479  | 0.37451516758038367 | 1.934422379337211   | 0.28174535542744455 |
| 1.8863195137764277  | 0.26112984161568037 | 1.8072933774979982  | 0.26112984161568037 | 1.7110876463764317  |
| 0.257693922647053   | 1.6423692670038843  | 0.24738616574117084 | 1.6011382393803557  | 32                  |
| 1.2049810267911485  | 1.7754810636373917  | 0.38110956269491075 | 1.6433164629964043  | 0.447541504816042   |
| 1.6048558649262756  | 0.5734125530455538  | 1.587373774894399   | 0.7167656913069422  | 1.5419203408115199  |
| 0.9335436077022127  | 1.4090564565692574  | 1.1153573440337297  | 1.321646006409874   | 1.321646006409874   |
| 1.2726961543206194  | 1.513948996760517   | 1.2482212282759921  | 1.6677913890410316  | 1.3041639163779974  |
| 1.821633781321546   | 1.3985672025501312  | 1.9335191575255566  | 1.4754883986903886  | 1.769187511225916   |
| 1.4859776527095145  | 1.7307269131557874  | 1.5489131768242703  | 1.7167412411302863  | 1.660798553028281   |
| 1.7132448231239108  | 1.7936624372705434  | 1.7272304951494122  | 1.9440084115446825  | 1.7656910932195407  |
| 2.0174331896785644  | 1.9125406494873045  | 2.0523973697423177  | 1.7761803472386668  | 2.143304237908076   |
| 1.650309299009155   | 2.2307146880674593  | 1.4894740707158898  | 2.2971466301885908  | 1.3461209324545014  |
| 2.2761681221503385  | 1.1188537620401051  | 2.223721852054709   | 0.9440328617213386  | 2.1537934919272024  |
| 0.7936868874471995  | 2.066383041767819   | 0.6573265851985617  | 2.0104403536658135  | 0.5384483729818006  |
| 1.9824690096148112  | 0.39159881671403673 | 1.9614905015765591  | 0.3321597106056562  | 1.8775764694235513  |
| 0.3496418006375328  | 1.7307269131557874  | 0.38110956269491075 | 1.6433164629964043  | 33                  |
| 1.1510997118077568  | 1.492122534597603   | 0.35958060667129127 | 1.393802923002053   | 0.4143738419735833  |
| 1.3561325737317271  | 0.5239603125781673  | 1.325311378874188   | 0.6540942464211108  | 1.3047639156358284  |
| 0.7465578309937286  | 1.260244411952716   | 0.8972392280750316  | 1.1403842097289525  | 1.1164121692841997  |
| 1.0376468935371548  | 1.3184622244614015  | 0.9897028126476494  | 1.4931156619874573  | 0.9725799266156832  |
| 1.6472216362751535  | 1.0170994302987955  | 1.7739309929117038  | 1.0890155516330535  | 1.900640349548254   |
| 1.1712054045864917  | 1.777355570118097   | 1.174629981792885   | 1.695165717164659   | 1.2054511766504241  |
| 1.6609199451007264  | 1.3698308825573002  | 1.65407079068794    | 1.4862665075746706  | 1.695165717164659   |
| 1.6232495958304007  | 1.739685220847771   | 1.7294114892285914  | 1.886942040722681   | 1.7979030333564565  |
| 1.7636572612925239  | 1.9109140811674337  | 1.558182628908929   | 2.034198860597591   | 1.38010461417648    |
| 2.034198860597591   | 1.1780545589992781  | 0.9897028126476494  | 1.9177632355802203  | 0.8698426104238856  |
| 1.8526962686587485  | 0.7499824082001219  | 1.79105387894367    | 0.630122205976358   | 1.7705064157053105  |
| 0.4931391177206281  | 1.7533835296733442  | 1.7054394487838387  | 0.36300518387768455 | 1.5924284009728615  |
| 0.3732789154968643  | 1.4554453127171314  | 0.35958060667129127 | 1.393802923002053   |                     |

|                     |                     |                     |                     |                     |                     |
|---------------------|---------------------|---------------------|---------------------|---------------------|---------------------|
| 31                  | 1.1381435001812776  | 1.876251326999135   | 0.33565612861203153 | 1.779676765245042   | 0.40558448873953806 |
| 1.7097484051175356  | 0.5629232990264278  | 1.692266315085659   | 0.7307513633324436  | 1.629330790970903   |                     |
| 0.9195579356767113  | 1.4999633247350157  | 1.1433286880847324  | 1.4300349646075092  | 1.3286388424226248  |                     |
| 1.405560038562882   | 1.4859776527095145  | 1.405560038562882   | 1.6538057170155303  | 1.4859776527095145  | 1.853101543378924   |
| 1.5803809388816483  | 1.7272304951494122  | 1.5943666109071497  | 1.6852734790729083  | 1.6433164629964043  |                     |
| 1.6852734790729083  | 1.7517054211940395  | 1.6957627330920342  | 1.8775764694235513  | 1.7097484051175356  |                     |
| 2.0104403536658135  | 1.7517054211940395  | 2.0733758777805695  | 1.8391158713534226  | 2.1258221478761996  |                     |
| 1.7202376591366615  | 2.213232598035583   | 1.5698916848625224  | 2.3286143922459686  | 1.3880779485310053  |                     |
| 2.3600821543033463  | 1.1747964501421102  | 2.314628720220467   | 0.9824934597914672  | 2.258686032118462   |                     |
| 0.8496295755492047  | 2.1817648359782047  | 0.7272549453260683  | 2.122325729869824   | 0.5804053890583045  |                     |
| 2.087361549806071   | 0.4440450868096667  | 2.0698794597741945  | 0.35313821864390815 | 2.024426025691315   |                     |
| 0.35313821864390815 | 1.91603706749368    | 0.3496418006375328  | 1.8391158713534226  | 0.33565612861203153 |                     |
| 1.779676765245042   |                     |                     |                     |                     |                     |
| 37                  | 1.1949733647487641  | 1.713202194242449   | 0.4096999951778452  | 1.621439811424184   | 0.4826127061840719  |
| 1.5763033712774723  | 0.5763576203349348  | 1.5554711681328361  | 0.6978788053453127  | 1.5346389649882     | 0.8332881257854479  |
| 1.440894050837337   | 0.9548093107958258  | 1.347149136686474   | 1.1110508343805972  | 1.288124561110005   | 1.2638203241079293  |
| 1.232572019390975   | 1.4061737122629434  | 1.215211850103778   | 1.5311669311307605  | 1.2186838839612175  | 1.687408454715532   |
| 1.2777084595376869  | 1.7880974365812736  | 1.336733035114156   | 1.867954215302379   | 1.4096457461203826  |                     |
| 1.7672652334366374  | 1.4235338815501402  | 1.6631042177134565  | 1.4721423555542912  | 1.6144957437093053  |                     |
| 1.545055066560518   | 1.5901915067072296  | 1.6735203192857746  | 1.5971355744221085  | 1.7776813350089555  |                     |
| 1.6457440484262595  | 1.8922584523044546  | 1.7394889625771224  | 1.97211523102556    | 1.8228177751556673  | 2.003363535742514   |
| 1.944338960166045   | 2.0346118404594686  | 1.829761842870546   | 2.097108449893377   | 1.6735203192857746  | 2.215157601046316   |
| 1.4756143894117306  | 2.2637660750504667  | 1.2360440532484143  | 2.215157601046316   | 1.0485542249466886  |                     |
| 2.1596050593272857  | 0.8923127013619171  | 2.076276246748741   | 0.7812076179238574  | 2.0068355695999536  |                     |
| 0.6596864329134796  | 1.944338960166045   | 0.5728855864774954  | 1.933922858593727   | 0.4409482998947995  |                     |
| 1.9235067570214088  | 0.4096999951778452  | 1.8575381137300608  | 0.39928389360552713 | 1.7464330302920013  |                     |
| 0.4096999951778452  | 1.6735203192857746  | 0.4096999951778452  | 1.621439811424184   |                     |                     |
| 36                  | 0.9841642062039455  | 1.6650212130100155  | 0.22916528522500418 | 1.5694349836621497  | 0.26735949942917153 |
| 1.5173519642928308  | 0.37499773945909776 | 1.496518756545103   | 0.5069413885280395  | 1.4687411462147995  |                     |
| 0.6458294401795572  | 1.3923527178064647  | 0.8055506995788025  | 1.267353471320099   | 1.0312437835125188  |                     |
| 1.1840206403291882  | 1.1597152312901726  | 1.1631874325814606  | 1.3645751074761612  | 1.1492986274163088  |                     |
| 1.493046555253815   | 1.1874928416204762  | 1.5867959901185895  | 1.2430480622810833  | 1.6909620288572278  |                     |
| 1.312492088106842   | 1.7708226585568505  | 1.3576307048935854  | 1.6458234120704847  | 1.3749917113500252  |                     |
| 1.5208241655841186  | 1.43401913330192    | 1.4861021526712392  | 1.5486017759144222  | 1.4826299513799512  |                     |
| 1.6909620288572278  | 1.5069353604189668  | 1.8229056779261696  | 1.559018379788286   | 1.9062385089170801  |                     |
| 1.743045048226547   | 1.9930435411992788  | 1.6249902043227569  | 2.1215149889769327  | 1.4027693216803285  |                     |
| 2.225681027715571   | 1.1874928416204762  | 2.215264423841707   | 1.0104105757647912  | 2.17707020963754    | 0.8437449137829699  |
| 2.1145705863943567  | 0.718745667296604   | 2.045126560568598   | 0.6319406350144054  | 1.9652659308689753  |                     |
| 0.5381912001496311  | 1.9166551127909441  | 0.4270807588284169  | 1.8888775024606406  | 0.3229147200897786  |                     |
| 1.8784608985867768  | 0.23958188909886802 | 1.864572093421625   | 0.21180427876856447 | 1.8055446714697299  |                     |
| 0.22222088264242829 | 1.7152674378962434  | 0.20833207747727653 | 1.5972125939924533  | 0.22916528522500418 |                     |
| 1.5694349836621497  |                     |                     |                     |                     |                     |
| 34                  | 1.214859739859431   | 1.6295012646829097  | 0.4475278275242026  | 1.527887973656848   | 0.5419282286425892  |
| 1.4789396175213883  | 0.6503138743711069  | 1.4614580617587243  | 0.8006552539300188  | 1.405517083318199   |                     |
| 0.9335150777262664  | 1.2936351264371482  | 1.1852494807086305  | 1.1782568584035646  | 1.3775465940979361  |                     |
| 1.1363011245731707  | 1.5453695294195122  | 1.1258121911155723  | 1.6992072201309567  | 1.1572789914883677  |                     |
| 1.8670301554525328  | 1.2307015256915572  | 2.010378912706379   | 1.2831461929795498  | 1.8915043335202626  |                     |
| 1.2936351264371482  | 1.8145854881645402  | 1.3216056156574107  | 1.7691334431816135  | 1.4509691283011257  |                     |
| 1.7621408208765479  | 1.5978141967075046  | 1.797103932401876   | 1.734170331656285   | 1.8390596662322702  | 1.821578110469606   |
| 1.9963936680962475  | 1.8775190889101312  | 1.842555977384803   | 2.013875223858912   | 1.6467625528429644  |                     |
| 2.1292534918924955  | 1.4964211732840524  | 2.1432387365026266  | 1.3251019268099438  | 2.111771936129831   |                     |
| 1.1188195688105065  | 2.045342024231707   | 0.9614855669465291  | 1.9719194900285177  | 0.8391146766078799  |                     |
| 1.9089858892829268  | 0.7552032089470919  | 1.8705264666050656  | 0.6573064966761726  | 1.8495485996898686  |                     |

|                     |                     |                     |                     |                    |
|---------------------|---------------------|---------------------|---------------------|--------------------|
| 0.5559134732527204  | 1.8460522885373358  | 0.4685056944393996  | 1.8355633550797372  | 0.4230536494564728 |
| 1.776126065486679   | 0.41606102715140714 | 1.6992072201309567  | 0.44053520521913697 | 1.5663473963347092 |
| 0.4475278275242026  | 1.527887973656848   |                     |                     |                    |
| 30                  | 1.3535605536332178  | 1.8283494809688583  | 0.7439446366782007  | 1.6228373702422145 |
| 0.8615916955017301  |                     |                     |                     |                    |
| 1.5986159169550174  | 1.0346020761245676  | 1.4705882352941178  | 1.2491349480968859  | 1.3598615916955017 |
| 1.4567474048442905  | 1.273356401384083   | 1.6193771626297577  | 1.259515570934256   | 1.782006920415225  |
| 1.301038062283737   |                     |                     |                     |                    |
| 1.9169550173010381  | 1.3806228373702423  | 2.0484429065743943  | 1.4429065743944636  | 1.9134948096885813 |
| 1.505190311418685   | 1.8131487889273357  | 1.6228373702422145  | 1.7889273356401385  | 1.806228373702422  |
| 1.8269896193771626  | 1.9930795847750864  | 1.9273356401384083  | 2.1176470588235294  | 2.0726643598615917 |
| 2.1660899653979238  | 1.972318339100346   | 2.262975778546713   | 1.7577854671280277  | 2.370242214532872  |
| 1.508650519031142   |                     |                     |                     |                    |
| 2.359861591695502   | 1.2698961937716262  | 2.273356401384083   | 1.1245674740484428  | 2.204152249134948  |
| 1.0173010380622838  |                     |                     |                     |                    |
| 2.131487889273356   | 0.9446366782006921  | 2.093425605536332   | 0.8373702422145328  | 2.055363321799308  |
| 0.7474048442906575  |                     |                     |                     |                    |
| 2.0588235294117645  | 0.657439446366782   | 2.0311418685121105  | 0.6470588235294118  | 1.9515570934256055 |
| 0.6678200692041523  | 1.8166089965397925  | 0.6920415224913494  | 1.6643598615916955  | 0.7439446366782007 |
| 1.6228373702422145  |                     |                     |                     |                    |
| 31                  | 1.2628782768157543  | 1.4542287569783139  | 0.620679574114976   | 1.3084596427288682 |
| 0.6810700191640007  |                     |                     |                     |                    |
| 1.2715543707544643  | 0.8152710081618333  | 1.2614892965796267  | 0.9360518982598827  | 1.2346490987800602 |
| 1.0836729861574985  | 1.1440634312065232  | 1.2245840246052229  | 1.0534777636329862  | 1.3990453103024052 |
| 0.9796672196841782  | 1.5701515712746419  | 0.9461169724347201  | 1.7043525602724745  | 0.9595370713345034 |
| 1.858683697619982   | 1.0232825411084738  | 1.9895296618928688  | 1.1407084064815773  | 1.8922339448694403 |
| 1.201098851530602   | 1.751322906421716   | 1.2983945685540308  | 1.7110626097223662  | 1.4325955575518634 |
| 1.7244827086221495  | 1.6137668926989375  | 1.7848731536711742  | 1.731192758072041   | 1.952624389918465  |
| 1.8351985245453613  | 1.7848731536711742  | 1.9492693651935191  | 1.5902817196243169  | 1.9995947360677064 |
| 1.3587850136030555  | 1.9626894640933024  | 1.1641935795561982  | 1.862038722344928   | 1.0668978625327694 |
| 1.7748080794963366  | 0.9427619477097743  | 1.7077075849974204  | 0.8521762801362373  | 1.680867387197854  |
| 0.7313953900381879  | 1.6640922635731248  | 0.6408097224646508  | 1.6506721646733415  | 0.600549425765301  |
| 1.6037018185241     |                     |                     |                     |                    |
| 0.5904843515904636  | 1.492986002600888   | 0.600549425765301   | 1.3889802361275678  | 0.620679574114976  |
| 1.3084596427288682  |                     |                     |                     |                    |
| 31                  | 1.2997239872602369  | 1.8216606334514185  | 0.6962295141142152  | 1.7371608955104683 |
| 0.7508357505153301  |                     |                     |                     |                    |
| 1.6927933284345624  | 0.8566353335424902  | 1.665490210234005   | 0.9692606961197897  | 1.6279484227082384 |
| 1.0887118382472287  | 1.4982586112555905  | 1.2184016496998766  | 1.3890461384533606  | 1.3719816895780121 |
| 1.3276141225021063  | 1.5733421863071235  | 1.2968981145264793  | 1.7371608955104683  | 1.3378527918273153 |
| 1.890740935388604   | 1.4231750362040574  | 1.802005801236792   | 1.4538910441796846  | 1.6347742022583778 |
| 1.546039068106566   |                     |                     |                     |                    |
| 1.61088397383289    | 1.685967548884423   | 1.6142968636079598  | 1.8088315807869315  | 1.7200964466351198 |
| 1.9692374002152067  |                     |                     |                     |                    |
| 1.815657360337071   | 2.0238436366163217  | 1.9248698331393008  | 2.095514321892785   | 1.8327218092124193 |
| 2.2081396844700842  | 1.665490210234005   | 2.2832232595216175  | 1.5016715010306603  | 2.2832232595216175 |
| 1.3276141225021063  | 2.2456814719958507  | 1.2081629803746674  | 2.1979010151448755  | 1.0989505075724377 |
| 2.122817440093342   | 1.0033895938704867  | 2.0784498730174366  | 0.8975900108433265  | 2.061385424142088  |
| 0.7713130891657481  | 2.0647983139171577  | 0.7269455220898423  | 2.010192077516043   | 0.6928166243391455 |
| 1.9043924944888826  | 0.6894037345640758  | 1.7883542421365135  | 0.6962295141142152  | 1.7371608955104683 |
| 28                  | 0.979126053562758   | 1.6691966494064923  | 0.3978763359191266  | 1.5132903374701823 |
| 0.48969395190046344 |                     |                     |                     |                    |
| 1.492886422807663   | 0.6359220069818519  | 1.4384759837076115  | 0.7855507145069934  | 1.3330557579512616 |
| 0.9453813793633947  | 1.2174335748636522  | 1.152821178432341   | 1.1596224833198476  | 1.3262544530637552 |
| 1.1766257455386135  | 1.4656812032576372  | 1.231036184638665   | 1.632313173001545   | 1.305850538401236  |
| 1.523492294801442   |                     |                     |                     |                    |
| 1.3500590201700278  | 1.4248733739325985  | 1.475883160588897   | 1.4078701117138326  | 1.6595183925515706 |
| 1.4894857703639097  | 1.8227497098517251  | 1.649316435220311   | 1.962176460045607   | 1.5030883801389225 |
| 2.0777986431332165  | 1.367062282388794   | 2.132209082233268   | 1.1630231357636007  | 2.1526129968957872 |
| 0.9759872513571737  | 2.105003862683242   | 0.8569644158258111  | 2.0471927711394375  | 0.7447428851819549 |
| 1.9791797222643732  | 0.6427233118693583  | 1.914567325833062   | 0.5100978665629827  | 1.8941634111705428 |
| 0.40807829325038625 | 1.8703588440642702  | 0.32306198215655574 | 1.8125477525204654  | 0.3128600248252961 |
| 1.7037268743203624  | 0.32306198215655574 | 1.5711014290139869  | 0.3978763359191266  | 1.5132903374701823 |
| 29                  | 1.1533062537431278  | 1.6648917297947936  | 0.4183649268608171  | 1.4999913231351247 |
| 0.5238064937932182  |                     |                     |                     |                    |
| 1.479583277922402   | 0.7550976728707431  | 1.4217604831530208  | 0.9625794658667581  | 1.2755028257951742 |
| 1.1530545545188375  | 1.170061258862773   | 1.350332324908491   | 1.1122384640933918  | 1.5340047318229961 |



|                     |                    |                    |                     |                    |
|---------------------|--------------------|--------------------|---------------------|--------------------|
| 1.1360478501749018  | 1.7040717752623527 | 1.2244827127633673 | 1.8197173648011151  | 1.2823055075327485 |
| 1.710874456999927   | 1.3299242796957682 | 1.5884261857235902 | 1.3775430518587881  | 1.5169980274790604 |
| 1.5442087544293575  | 1.506794004872699  | 1.7176771387375012 | 1.5850248448548032  | 1.9115535682583678 |
| 1.7074731161311398  | 1.9795803856341103 | 1.8537307734889865 | 2.0408045212722787  | 1.6530516622305458 |
| 2.125838042991957   | 1.4659779144472536 | 2.1870621786301254 | 1.2346867353697286  | 2.1836608377613382 |
| 1.0340076241112879  | 2.0918246343040856 | 0.9251647163100997 | 2.0135937943219817  | 0.7959137632961887 |
| 1.9353629543398776  | 0.6836695146262134 | 1.8911455230456449 | 0.5033984485804954  | 1.8639347960953478 |
| 0.38775285904173296 | 1.8469280917514121 | 0.3707461546977973 | 1.7448878656877982  | 0.3945555407793072 |
| 1.5646167996420803  | 0.4183649268608171 | 1.4999913231351247 |                     |                    |
| 30                  | 1.4717717224640001 | 1.7599375624151214 | 0.7824370488739053  | 1.549607033795393  |
| 1.5190729046429967  | 1.0534274414107214 | 1.4961723080905898 | 1.2480825121061807  | 1.396936389696826  |
| 1.419836986249233   | 1.2518992781982485 | 1.648842951773303  | 1.1870142546330955  | 1.874032151205305  |
| 1.2022813190013668  |                    |                    |                     |                    |
| 2.0496033914404252  | 1.286250173026859  | 2.2099075673072743 | 1.3740357931444191  | 2.061053689716629  |
| 1.4045699218809617  | 1.9121998121259833 | 1.4580046471699115 | 1.8358644902846266  | 1.67174354832571   |
| 1.8511315546528981  | 1.8663986190211694 | 1.9236501104021868 | 2.0152524966118146  | 2.0686872219007646 |
| 2.0763207540849002  | 2.1870069707548674 | 2.1373890115579854 | 1.9999854322435435  | 2.2442584621358845 |
| 1.7900632971798127  | 2.3167770178851734 | 1.6297591213129639 | 2.301509953516902   | 1.4503711149857759 |
| 2.2442584621358845  | 1.2709831086585877 | 2.1144884150055785 | 1.1831974885410277  | 2.061053689716629  |
| 1.0457939092265858  | 1.98853513396734   | 0.8740394350835333 | 1.9732680695990685  | 0.7709867505977018 |
| 1.942733940862526   |                    |                    |                     |                    |
| 0.7251855574928879  | 1.874032151205305  | 0.7137352592166843 | 1.7289950397067275  | 0.7366358557690914 |
| 1.5954082264843534  | 0.7824370488739053 | 1.549607033795393  |                     |                    |
| 30                  | 1.350369100348251  | 1.7562108858142051 | 0.6287833679040944  | 1.6287761939684373 |
| 0.7196918066372165  |                    |                    |                     |                    |
| 1.5757462713741162  | 0.8863572776479404 | 1.5378677552353153 | 1.0605984518864244  | 1.431807910046673  |
| 1.1969611099861075  | 1.2992331035608697 | 1.3674144326107114 | 1.2234760712832682  | 1.5984733810573968 |
| 1.178021851916707   | 1.784078110137521  | 1.2083246648277477 | 1.8863501037122834  | 1.2613545874220689 |
| 2.003773503742566   |                    |                    |                     |                    |
| 1.3257480648580304  | 1.8560472908012426 | 1.393929393907872  | 1.7613510004542405  | 1.5113527939381548 |
| 1.73862389077096    |                    |                    |                     |                    |
| 1.6818061165627587  | 1.7499874456126001 | 1.8484715875734825 | 1.8105930714346816  | 1.9961978005148058 |
| 1.9507435811482448  | 2.064379129564647  | 2.106045497317328  | 2.098469794089568   | 1.9355921746927245 |
| 2.212105342505971   |                    |                    |                     |                    |
| 1.7348360391570798  | 2.3333165941501335 | 1.4848378326409941 | 2.318165187694613   | 1.2348396261249084 |
| 2.231044600575371   | 1.1022648196391054 | 2.1439240134561293 | 0.9659021615394222  | 2.0681669811785275 |
| 0.8068123937564585  | 2.0227127618119662 | 0.6893889937261758 | 2.0227127618119662  | 0.609844109834694  |
| 1.9886220972870456  | 0.5568141872403728 | 1.871198697256763  | 0.5833291485375334  | 1.696957523018279  |
| 0.6287833679040944  | 1.6287761939684373 |                    |                     |                    |
| 31                  | 1.2788201836390511 | 1.7706703269458628 | 0.5735685707254292  | 1.5961809566898457 |
| 0.6867728938949218  |                    |                    |                     |                    |
| 1.5584461823000149  | 0.8112976493813637 | 1.513164453032218  | 0.9773306566966196  | 1.3773192652288269 |
| 1.1622310512067908  | 1.252794509742385  | 1.3961866524237423 | 1.1848719158406893  | 1.5697666146169642 |
| 1.1924188707186556  | 1.7093852798593385 | 1.249021032303402  | 1.8263630804678141  | 1.3093966713271312 |
| 1.9282469713203574  | 1.3584518780339114 | 1.7886283060779833 | 1.4112805621796745  | 1.6641035505915414 |
| 1.5320318402271333  | 1.6339157310796766 | 1.6603300731525583 | 1.649009640835609   | 1.7961752609559494 |
| 1.7207057121762876  | 1.9584347908322222 | 1.8150426481508648 | 2.04145129448985    | 1.9433408810762898 |
| 2.1056004109525626  | 1.8112691707118818 | 2.1886169146101904 | 1.6603300731525583  | 2.2980477603407    |
| 1.4641092463254377  |                    |                    |                     |                    |
| 2.328235579852565   | 1.2943027615711988 | 2.2980477603407    | 1.12449627681696    | 2.2527660310729027 |
| 0.9848776115745858  |                    |                    |                     |                    |
| 2.169749527415275   | 0.8829937207220424 | 2.109373888391546  | 0.7735628749915329  | 2.075412591440698  |
| 0.6528115969440741  |                    |                    |                     |                    |
| 2.033904339611884   | 0.5320603188966153 | 1.9773021780271376 | 0.5131929317016999  | 1.8490039451017126 |
| 0.5358337963355984  | 1.6716505054695074 | 0.5735685707254292 | 1.5961809566898457  |                    |
| 29                  | 1.0529115646258502 | 1.360921768707483  | 0.47619047619047616 | 1.1870748299319729 |
| 0.6020408163265306  |                    |                    |                     |                    |
| 1.1734693877551021  | 0.7346938775510204 | 1.153061224489796  | 0.8537414965986394  | 1.0850340136054422 |
| 0.9795918367346939  | 0.9829931972789115 | 1.1496598639455782 | 0.9285714285714286  | 1.3061224489795917 |
| 0.9183673469387755  | 1.4421768707482994 | 0.9455782312925171 | 1.5442176870748299  | 1.0034013605442176 |
| 1.6394557823129252  | 1.0816326530612246 | 1.534013605442177  | 1.1360544217687074  | 1.401360544217687  |
| 1.2074829931972788  | 1.336734693877551  | 1.3673469387755102 | 1.3911564625850341  | 1.5374149659863945 |
| 1.4965986394557824  | 1.6360544217687074 | 1.598639455782313  | 1.6972789115646258  | 1.4863945578231292 |
| 1.7857142857142858  | 1.3095238095238095 | 1.846938775510204  | 1.1156462585034013  | 1.816326530612245  |

|                     |                        |                     |                     |                    |
|---------------------|------------------------|---------------------|---------------------|--------------------|
| 0.9319727891156463  | 1.7414965986394557     | 0.8401360544217688  | 1.6428571428571428  | 0.7653061224489796 |
| 1.5952380952380953  | 0.6836734693877551     | 1.5578231292517006  | 0.5510204081632653  | 1.5442176870748299 |
| 0.43537414965986393 | 1.5 0.3945578231292517 | 1.41156462585034    | 0.42857142857142855 | 1.2619047619047619 |
| 0.47619047619047616 | 1.1870748299319729     |                     |                     |                    |
| 30                  | 1.2004375956202644     | 1.6423279154472177  | 0.45889334565669554 | 1.530786011257783  |
| 0.5924518567060323  |                        |                     |                     |                    |
| 1.4862665075746706  | 0.7328595221681556     | 1.4520207355107382  | 0.8869654964558519  | 1.366406305350907  |
| 1.054769779569121   | 1.2088757538568173     | 1.2362723715079633  | 1.1164121692841997  | 1.4348978494787719 |
| 1.0684680883946942  | 1.599277555385648      | 1.082166397220267   | 1.7362606436413779  | 1.147233364141739  |
| 1.9314615444057932  |                        |                     |                     |                    |
| 1.2054511766504241  | 1.7876293017372766     | 1.2842164523974688  | 1.667769099513513   | 1.3869537685892663 |
| 1.6472216362751535  | 1.5342105884641761     | 1.6711936767199063  | 1.7362606436413779  | 1.7807801473244902 |
| 1.8561208458651417  | 1.955433584850546      | 1.9485844304377595  | 1.79105387894367    | 2.0787183642807032 |
| 1.6164004414176143  |                        |                     |                     |                    |
| 2.1814556804725007  | 1.4143503862404123     | 2.1951539892980736  | 1.2533952575399296  | 2.1540590628213545 |
| 1.0376468935371548  | 2.0615954782487367     | 0.9075129596942113  | 1.9896793569144784  | 0.8013510662960206 |
| 1.9314615444057932  | 0.6986137501042231     | 1.9143386583738269  | 0.5239603125781673  | 1.8972157723418608 |
| 0.4794408088950551  | 1.8424225370395688     | 0.45889334565669554 | 1.7362606436413779  | 0.4554687684503023 |
| 1.5924284009728615  | 0.45889334565669554    | 1.530786011257783   |                     |                    |
| 30                  | 1.2143798735705695     | 1.6636222130768177  | 0.5589098866657459  | 1.5353187248167477 |
| 0.6733854056213806  |                        |                     |                     |                    |
| 1.4915486734513579  | 0.8282640489142982     | 1.457879403170289   | 0.936005713813719   | 1.4006416436924716 |
| 1.0605820138536743  | 1.319835395017906      | 1.2053598760622712  | 1.2356622193152333  | 1.3703393004395095 |
| 1.1952590949779505  | 1.5050163815637856     | 1.212093730118485   | 1.6363265356599548  | 1.255863781483875  |
| 1.7508020546155896  | 1.3097346139335853     | 1.8787452816836518  | 1.3939077896362577  | 1.6868304410815584 |
| 1.4174762788330062  | 1.6161249734913135     | 1.5386856518448546  | 1.592556484294565   | 1.6901973681096654 |
| 1.6161249734913135  | 1.8316083032901551     | 1.693564295137772   | 1.94608382224579    | 1.8147736681496207 |
| 1.9831200195549659  |                        |                     |                     |                    |
| 1.6497942437723825  | 2.0706601222857453     | 1.4982825275075717  | 2.1245309547354556  | 1.3400369571865474 |
| 2.1379986628478833  | 1.1716906057812022     | 2.1043293925668145  | 1.0134450354601778  | 2.016789289836035  |
| 0.898969516504543   | 1.939349968189576      | 0.7743932164645877  | 1.8888460627679726  | 0.659917697508953  |
| 1.872011427627438   |                        |                     |                     |                    |
| 0.5454421785533182  | 1.8450760114025828     | 0.5084059812441424  | 1.7541689816436965  | 0.518506762328463  |
| 1.6127580464632065  | 0.5589098866657459     | 1.5353187248167477  |                     |                    |
| 32                  | 1.020854638971688      | 1.6468170044180588  | 0.3537394503538616  | 1.5408074135605705 |
| 0.48979308510534686 |                        |                     |                     |                    |
| 1.506794004872699   | 0.6088400155128965     | 1.4693792553160407  | 0.7244856050516589  | 1.3877470744651494 |
| 0.8061177859025501  | 1.2823055075327485     | 0.9489741023916096  | 1.190469304075496   | 1.1190411458309661 |
| 1.139449191043689   | 1.2482920988448771     | 1.1224424866997533  | 1.397951097071511   | 1.139449191043689  |
| 1.5238007092166348  |                        |                     |                     |                    |
| 1.1972719858130703  | 1.6496503213617586     | 1.272101484926387   | 1.4897873005287634  | 1.3129175753518325 |
| 1.350332324908491   | 1.397951097071511      | 1.323121597958194   | 1.4965899822663378  | 1.3061148936142584 |
| 1.6224395944114616  |                        |                     |                     |                    |
| 1.3571350066460652  | 1.7482892065565854     | 1.4659779144472536  | 1.8843428413080707  | 1.656453003099333  |
| 1.969376363027749   | 1.5510114361669318     | 2.0646139073537886  | 1.4183591422842337  | 2.1632527925486156 |
| 1.2618974623200256  | 2.176858156023764      | 1.0782250554055206  | 2.149647429073467   | 0.9217633754413125 |
| 2.102028656910447   |                        |                     |                     |                    |
| 0.7925124224274016  | 2.0101924534531945     | 0.6904721963637876  | 1.948968317815026   | 0.5816292885625994 |
| 1.918356249995942   | 0.44217431294232706    | 1.9115535682583678  | 0.3843515181729458  | 1.8979482047832192 |
| 0.3401340868787131  | 1.7550918882941597     | 0.34353542774750023 | 1.6258409352802488  | 0.3537394503538616 |
| 1.5408074135605705  |                        |                     |                     |                    |
| 28                  | 1.3916238151716331     | 1.5215622628405696  | 0.7702658745909607  | 1.3885055897231793 |
| 0.8817517248607051  |                        |                     |                     |                    |
| 1.361478716930514   | 1.0101293706258652     | 1.3276951259396823  | 1.1486420936882749  | 1.2432361484626033 |
| 1.2905331758497676  | 1.1216152208956096     | 1.4898563626956742  | 1.023642807022198   | 1.7026929859379134 |
| 1.0135077297249484  | 1.8986378136847366     | 1.0574263980130294  | 2.0202587412517303  | 1.1283719390937759 |
| 1.8918810954865704  | 1.216209275669938      | 1.8209355544058239  | 1.3682354351286803  | 1.8243139135049071 |
| 1.4932347217947572  | 1.885124377288404      | 1.6452608812534997  | 2.047285614044396   | 1.7668818088204934 |
| 1.9324214046755683  | 1.8817460181893209     | 1.8074221180094914  | 1.9662049956663998  | 1.6452608812534997 |
| 1.9864751502608988  | 1.4898563626956742     | 1.9560699183691503  | 1.297289894047934   | 1.885124377288404  |
| 1.2026958392736053  | 1.8344489908021566     | 1.0776965526075284  | 1.7702601679195766  | 0.9459405477432852 |
| 1.736476576928745   | 0.8243196201762913     | 1.7297198587305787  | 0.7635091563927945  | 1.6824228313434144 |
| 0.7466173608973786  | 1.550666826479171      | 0.7668875154918776  | 1.425667539813094   | 0.7702658745909607 |
| 1.3885055897231793  |                        |                     |                     |                    |

|                     |                     |                     |                     |                     |                     |
|---------------------|---------------------|---------------------|---------------------|---------------------|---------------------|
| 30                  | 1.057234593697837   | 1.559582782132805   | 0.31520896490515093 | 1.4743645132660286  | 0.46095074437742506 |
| 1.413356326510193   | 0.6202498986843293  | 1.3726842020063026  | 0.7388769284873431  | 1.2710038907465764  |                     |
| 0.9117334576288775  | 1.1015367053136995  | 1.0981473616050421  | 1.0066350814712886  | 1.2947292967071793  |                     |
| 0.9625736132587406  | 1.4608071384313985  | 0.9964670503453159  | 1.6336636675729328  | 1.0574752371011515  |                     |
| 1.7624587285019193  | 1.1218727675656448  | 1.5218153251872342  | 1.2167743914080558  | 1.4947005755179739  |                     |
| 1.369294858297645   | 1.5184259814785765  | 1.5590981059824671  | 1.603159574195015   | 1.6946718543287687  |                     |
| 1.7116185728720563  | 1.7692374159192343  | 1.81668822784044    | 1.8132988841317823  | 1.6709464483681657  |                     |
| 1.9658193510213715  | 1.4845325443920012  | 2.0641103185724403  | 1.274393234455234   | 2.0912250682417004  |                     |
| 1.0879793304790695  | 2.0471636000291524  | 0.9185121450461926  | 1.9827660695646592  | 0.7626023344479459  |                     |
| 1.8912537894309056  | 0.6744793980228498  | 1.8505816649270153  | 0.5050122125899731  | 1.8438029775097002  |                     |
| 0.35927043311769896 | 1.823466915257755   | 0.30504093377917835 | 1.7455120099586316  | 0.2948729026532057  |                     |
| 1.6370530112815904  | 0.3016515900705208  | 1.5252046688958918  | 0.31520896490515093 | 1.4743645132660286  |                     |
| 28                  | 1.3180577510338796  | 1.6952586002727361  | 0.773630989267721   | 1.5742883886408647  | 0.9053847385316561  |
| 1.5371270747459087  | 1.0371384877955911  | 1.4425346393769296  | 1.2026752496913042  | 1.2871327812707498  |                     |
| 1.4796959532718856  | 1.2026752496913042  | 1.6350978113780654  | 1.229701659796727   | 1.7837430669578895  |                     |
| 1.2702412749548608  | 1.908740213695469   | 1.3107808901129947  | 1.7668515606420006  | 1.3378073002184172  |                     |
| 1.6722591252730215  | 1.432399735587396   | 1.6486110164307768  | 1.604693100009465   | 1.6891506315889107  |                     |
| 1.7769864644315339  | 1.756716656852467   | 1.871578899800513   | 1.908740213695469   | 1.9323883225377136  | 1.797256272010601   |
| 2.0540071680121152  | 1.6182063050621764  | 2.1317080970652054  | 1.4019950242187957  | 2.1317080970652054  |                     |
| 1.2567280699021495  | 2.07765527685436    | 1.1452441282172814  | 2.016845854117159   | 1.0675431991641915  | 1.9729279376958475  |
| 0.9695724625320347  | 1.9357666238008915  | 0.8682234246367     | 1.9154968162218247  | 0.7972790981099658  | 1.8918487073795798  |
| 0.7297130728464094  | 1.8209043808528456  | 0.7229564703200537  | 1.7060421379047996  | 0.7263347715832316  |                     |
| 1.6114497025358208  | 0.773630989267721   | 1.5742883886408647  |                     |                     |                     |
| 30                  | 1.135664198920347   | 1.7499595090179145  | 0.49658714930343156 | 1.6632268219820414  | 0.5714153498834007  |
| 1.6122075943138805  | 0.6870589325978984  | 1.5986024669357044  | 0.8299127700687486  | 1.5509845211120876  |                     |
| 0.9285499435605261  | 1.4523473476203101  | 1.0680024991868322  | 1.3401050467503564  | 1.248270436947667   |                     |
| 1.2686781280149313  | 1.4217358110194136  | 1.2584742824812991  | 1.5952011850911603  | 1.306092228304916   |                     |
| 1.7312524588729223  | 1.3605127378176207  | 1.8366921960537879  | 1.3945255562630612  | 1.649621694603865   |                     |
| 1.4591499113093982  | 1.57819477586844    | 1.642819130914777   | 1.6020037487802483  | 1.7550614317847306  | 1.6734306675156734  |
| 1.911520396633757   | 1.826488350520156   | 1.9999537245919023  | 1.6326152853811449  | 2.1394062802182088  |                     |
| 1.4727550386875745  | 2.2142344807981775  | 1.30949351014946    | 2.2142344807981775  | 1.115620445010449   | 2.1598139712854727  |
| 1.0033781441404952  | 2.0951896162391357  | 0.9217473798714381  | 2.037367824881887   | 0.8299127700687486  |                     |
| 1.9999537245919023  | 0.717670469198795   | 1.9931511609028143  | 0.6054281683288412  | 1.9931511609028143  |                     |
| 0.4931858674588875  | 1.97274346983555    | 0.4795807400807113  | 1.8639024508101403  | 0.4727781763916232  |                     |
| 1.7414563044065545  | 0.49658714930343156 | 1.6632268219820414  |                     |                     |                     |
| 32                  | 1.0592792707744654  | 1.7570370871124006  | 0.43623915455426293 | 1.6006621286337186  | 0.5402654144864333  |
| 1.5603938989825559  | 0.68791558987403    | 1.5234813551356567  | 0.8456328226744174  | 1.399320980377905   | 0.9899273122577505  |
| 1.2852276630329438  | 1.1879127747093006  | 1.2181139469476727  | 1.3624084365310059  | 1.201335517926355   |                     |
| 1.5234813551356567  | 1.244959433381781   | 1.704688388565889   | 1.32885157848837    | 1.5603938989825559  | 1.37583117974806    |
| 1.436233524224804   | 1.4731460680717032  | 1.4026766661821686  | 1.6308633008720907  | 1.4026766661821686  |                     |
| 1.7248225033914704  | 1.4395892100290677  | 1.872472678779067   | 1.5167699835271296  | 1.979854624515501   |                     |
| 1.5872393854166644  | 2.010055796753873   | 1.7483123040213153  | 2.046968340600772   | 1.5603938989825559  | 2.177840086967051   |
| 1.4093880377906955  | 2.244953803052322   | 1.261737862403099   | 2.2516651746608494  | 1.100664943798448   | 2.2113969450096866  |
| 0.9597261400193785  | 2.147638914728679   | 0.825498707848836   | 2.0704581412306173  | 0.7214724479166656  | 2.003344425145346   |
| 0.6241575595930223  | 1.9697875671027103  | 0.4999971848352706  | 1.9697875671027103  | 0.42617209714147225 |                     |
| 1.949653452277129   | 0.3322128946220925  | 1.8691169929748035  | 0.32214583720930184 | 1.7449566182170517  |                     |
| 0.36241406686046457 | 1.6241519292635636  | 0.43623915455426293 | 1.6006621286337186  |                     |                     |
| 32                  | 0.9757520448634527  | 1.5373650230664337  | 0.3434323967428301  | 1.3871975240984904  | 0.40403811381509425 |
| 1.340059744153396   | 0.5252495479596225  | 1.340059744153396   | 0.6195251078498112  | 1.2996559327718866  |                     |
| 0.7407365419943395  | 1.2020133885999054  | 0.9360216303383017  | 1.05723306448283    | 1.154875608654811   | 1.0168292531013206  |
| 1.346793712716981   | 1.0269302059466978  | 1.4410692726071694  | 1.080801954455377   | 1.5993175338514147  |                     |
| 1.1515086243730186  | 1.4309683197617922  | 1.2255822785724526  | 1.3299587913080186  | 1.3265918070262261  |                     |
| 1.2895549799265091  | 1.4680051468615092  | 1.3097568856172639  | 1.6296203923875467  | 1.3905645083802827  |                     |

|                     |                     |                    |                     |                     |
|---------------------|---------------------|--------------------|---------------------|---------------------|
| 1.6935930937416035  | 1.4646381625797167  | 1.750831826532075  | 1.5387118167791507  | 1.7845016693499995  |
| 1.6296203923875467  | 1.8518413549858488  | 1.4949410211158487 | 1.9326489777488676  | 1.3265918070262261  |
| 2.020190569075471   | 1.1515086243730186  | 2.020190569075471  | 0.9595905203108489  | 1.9696858048485846  |
| 0.8047092433483961  | 1.8888781820855656  | 0.6733968563584904 | 1.801336590758962   | 0.5622863750593395  |
| 1.7541988108138675  | 0.47474478373273576 | 1.7407308736866978 | 0.3804692238425471  | 1.7373638894049053  |
| 0.32659747533386785 | 1.6565562666418865  | 0.3097625539249056 | 1.5218768953701884  | 0.31312953820669803 |
| 1.444436256888962   | 0.3434323967428301  | 1.3871975240984904 |                     |                     |
| 33                  | 1.054989932885906   | 1.7249395973154364 | 0.2785234899328859  | 1.6140939597315436  |
| 1.5671140939597314  | 0.4597315436241611  | 1.5369127516778522 | 0.6644295302013423  | 1.4496644295302012  |
| 0.8053691275167785  | 1.332214765100671   | 1.016778523489933  | 1.1979865771812082  | 1.1879194630872483  |
| 1.1375838926174497  | 1.3590604026845639  | 1.1375838926174497 | 1.5134228187919463  | 1.1946308724832215  |
| 1.651006711409396   | 1.2483221476510067  | 1.8120805369127517 | 1.3053691275167785  | 1.6476510067114094  |
| 1.3523489932885906  | 1.5604026845637584  | 1.4597315436241611 | 1.5335570469798658  | 1.6275167785234899  |
| 1.5503355704697988  | 1.7684563758389262  | 1.6174496644295302 | 1.9228187919463087  | 1.7046979865771812  |
| 1.9865771812080537  | 1.8221476510067114  | 2.030201342281879  | 1.6140939597315436  | 2.161073825503356   |
| 1.4731543624161074  | 2.238255033557047   | 1.25503355704698   | 2.2583892617449663  | 1.0771812080536913  |
| 0.9429530201342282  | 2.1577181208053693  | 0.8221476510067114 | 2.0805369127516777  | 0.7315436241610739  |
| 2.033557046979866   | 0.6174496644295302  | 2.0                | 0.48322147651006714 | 1.983221476510067   |
| 1.9798657718120805  | 0.27181208053691275 | 1.9463087248322148 | 0.2550335570469799  | 1.8355704697986577  |
| 0.2651006711409396  | 1.7080536912751678  | 0.2785234899328859 | 1.6140939597315436  |                     |
| 35                  | 1.368456544368784   | 1.5131913060214937 | 0.6135557968742643  | 1.3559244129817996  |
| 1.305077247494982   | 0.8440629470811702  | 1.2813485702678007 | 1.0338923648986222  | 1.2169421606511652  |
| 1.1627051841318932  | 1.1186376407099847  | 1.277958759235346  | 1.0203331207688042  | 1.45422893292298    |
| 1.603380618350978   | 0.9491470890872598  | 1.8033794692657936 | 0.9898248214767137  | 1.9593107767587006  |
| 1.0711802862556217  | 2.0474458636025177  | 1.1355866958722571 | 1.955920965726246   | 1.1491459400020752  |
| 1.820328524428066   | 1.2033829165213472  | 1.799989658233339  | 1.305077247494982   | 1.759311925843885   |
| 1.7762609810061576  | 1.5932111852536146  | 1.820328524428066  | 1.7321934375842492  | 1.8847349340447015  |
| 1.7830406030710666  | 2.0542254856674265  | 1.8372775795903384 | 1.935582099531519   | 1.9254126664341555  |
| 1.806769280298248   | 2.016937564310427   | 1.6610074059027045 | 2.071174540829699   | 1.5186353425396155  |
| 1.3627040350467086  | 2.010157942245518   | 1.2203319716836196 | 1.949141343661337   | 1.1186376407099847  |
| 1.0135534987038952  | 1.7965998472008846  | 0.9084693566978057 | 1.7491424927465216  | 0.7999954036592618  |
| 1.7355832486167035  | 0.6508437182312639  | 1.7220240044868855 | 0.6067761748093553  | 1.6542277838377957  |
| 0.5864373086146284  | 1.5220251535720701  | 0.5999965527444463 | 1.4033817674361626  | 0.6135557968742643  |
| 1.3559244129817996  |                     |                    |                     |                     |
